# Supplementary material for: Genome-wide identification and functional analysis of class III peroxidases in Gossypium hirsutum
Source: PeerJ. 2022 Jul 1;10:e13635. doi: 10.7717/peerj.13635 (PMC9252181; doi:10.7717/peerj.13635)
Supplement: Supplemental Information 1 [file peerj-10-13635-s001.xlsx]

## Sheet: GO_background file
Ghir_A11G036010	GO:0000002
Ghir_D11G034090	GO:0000002
Ghir_A05G019900	GO:0000003
Ghir_D13G009590	GO:0000003
Ghir_A13G009360	GO:0000003
Ghir_A08G014150	GO:0000003
Ghir_D13G022440	GO:0000003
Ghir_D08G015060	GO:0000003
Ghir_A07G005520	GO:0000003
Ghir_D05G005980	GO:0000003
Ghir_D02G003650	GO:0000003
Ghir_D01G010110	GO:0000003
Ghir_A02G004430	GO:0000003
Ghir_A13G021620	GO:0000003
Ghir_D07G005530	GO:0000003
Ghir_A02G019400	GO:0000003
Ghir_A02G003290	GO:0000003
Ghir_A08G014840	GO:0000009
Ghir_D08G015640	GO:0000009
Ghir_A06G010010	GO:0000010
Ghir_D13G016600	GO:0000010
Ghir_D07G011360	GO:0000010
Ghir_A10G004210	GO:0000010
Ghir_A07G011300	GO:0000010
Ghir_A08G016490	GO:0000010
Ghir_A13G015870	GO:0000010
Ghir_A06G005360	GO:0000010
Ghir_A08G021010	GO:0000012
Ghir_A03G003620	GO:0000012
Ghir_D08G017960	GO:0000014
Ghir_D10G002430	GO:0000014
Ghir_A10G001630	GO:0000014
Ghir_A10G001620	GO:0000014
Ghir_A04G016370	GO:0000015
Ghir_A01G020200	GO:0000015
Ghir_D13G024550	GO:0000015
Ghir_A09G014570	GO:0000015
Ghir_D01G021730	GO:0000015
Ghir_D07G004480	GO:0000015
Ghir_D03G011050	GO:0000015
Ghir_D04G011430	GO:0000015
Ghir_A03G008550	GO:0000015
Ghir_A07G004450	GO:0000015
Ghir_A13G023810	GO:0000015
Ghir_D09G014570	GO:0000015
Ghir_A12G013360	GO:0000023
Ghir_D04G004310	GO:0000023
Ghir_D07G017970	GO:0000023
Ghir_D01G019870	GO:0000023
Ghir_D08G010670	GO:0000023
Ghir_D10G027420	GO:0000023
Ghir_A09G018050	GO:0000023
Ghir_D05G027960	GO:0000023
Ghir_D11G020420	GO:0000023
Ghir_D01G007850	GO:0000023
Ghir_D07G023830	GO:0000023
Ghir_A13G014830	GO:0000023
Ghir_D04G003510	GO:0000023
Ghir_D10G021860	GO:0000023
Ghir_A05G042230	GO:0000023
Ghir_D09G017510	GO:0000023
Ghir_A05G041650	GO:0000023
Ghir_D11G000150	GO:0000023
Ghir_D05G031420	GO:0000023
Ghir_D12G013590	GO:0000023
Ghir_A11G017150	GO:0000023
Ghir_D12G027600	GO:0000023
Ghir_D08G027470	GO:0000023
Ghir_D11G000680	GO:0000023
Ghir_A06G004980	GO:0000023
Ghir_A07G023420	GO:0000023
Ghir_A09G015010	GO:0000023
Ghir_A08G010790	GO:0000023
Ghir_D06G006330	GO:0000023
Ghir_A12G008460	GO:0000023
Ghir_A08G010700	GO:0000023
Ghir_D03G001330	GO:0000023
Ghir_A06G014620	GO:0000023
Ghir_A07G023750	GO:0000023
Ghir_D13G021820	GO:0000023
Ghir_A05G040600	GO:0000023
Ghir_A12G022600	GO:0000023
Ghir_A12G028220	GO:0000023
Ghir_D05G007290	GO:0000023
Ghir_A08G016340	GO:0000023
Ghir_A06G006230	GO:0000023
Ghir_D08G017190	GO:0000023
Ghir_D13G000760	GO:0000023
Ghir_A09G020980	GO:0000023
Ghir_A05G024010	GO:0000023
Ghir_D07G023500	GO:0000023
Ghir_A13G001530	GO:0000023
Ghir_A13G020260	GO:0000023
Ghir_A01G007500	GO:0000023
Ghir_A02G013280	GO:0000023
Ghir_A03G011540	GO:0000023
Ghir_A02G007000	GO:0000023
Ghir_D11G024360	GO:0000023
Ghir_D06G015320	GO:0000023
Ghir_D07G001630	GO:0000023
Ghir_D07G013910	GO:0000023
Ghir_D04G005550	GO:0000023
Ghir_D10G017740	GO:0000023
Ghir_A05G029490	GO:0000023
Ghir_D08G005570	GO:0000023
Ghir_A11G000090	GO:0000023
Ghir_D11G011660	GO:0000023
Ghir_A05G002240	GO:0000023
Ghir_A11G003170	GO:0000023
Ghir_A12G027570	GO:0000023
Ghir_D06G005030	GO:0000023
Ghir_A01G018180	GO:0000023
Ghir_A11G002040	GO:0000023
Ghir_D07G001390	GO:0000023
Ghir_D11G002050	GO:0000023
Ghir_A12G005950	GO:0000023
Ghir_D09G014070	GO:0000023
Ghir_A11G000220	GO:0000023
Ghir_A06G003230	GO:0000023
Ghir_A02G018260	GO:0000023
Ghir_A13G021000	GO:0000023
Ghir_D03G005030	GO:0000023
Ghir_D04G006280	GO:0000023
Ghir_D09G015540	GO:0000023
Ghir_D06G003250	GO:0000023
Ghir_D13G006000	GO:0000023
Ghir_D09G002580	GO:0000023
Ghir_D10G000680	GO:0000023
Ghir_A05G007220	GO:0000023
Ghir_A11G016570	GO:0000023
Ghir_A11G013090	GO:0000023
Ghir_A07G001610	GO:0000023
Ghir_D05G006300	GO:0000023
Ghir_A07G013680	GO:0000023
Ghir_D05G014770	GO:0000023
Ghir_A01G008820	GO:0000023
Ghir_A11G028680	GO:0000023
Ghir_D02G007450	GO:0000023
Ghir_D03G006110	GO:0000023
Ghir_D11G003160	GO:0000023
Ghir_A13G006320	GO:0000023
Ghir_D05G022440	GO:0000023
Ghir_A01G019110	GO:0000023
Ghir_A05G037470	GO:0000023
Ghir_A05G027900	GO:0000023
Ghir_A05G022540	GO:0000023
Ghir_D04G000670	GO:0000023
Ghir_D04G002310	GO:0000023
Ghir_A05G038770	GO:0000023
Ghir_D05G028510	GO:0000023
Ghir_D11G016650	GO:0000023
Ghir_D11G015640	GO:0000023
Ghir_A05G006220	GO:0000023
Ghir_D11G036300	GO:0000023
Ghir_A01G018230	GO:0000023
Ghir_A01G002330	GO:0000023
Ghir_A08G005450	GO:0000023
Ghir_A05G031530	GO:0000023
Ghir_A10G023390	GO:0000023
Ghir_D05G002390	GO:0000023
Ghir_A11G011700	GO:0000023
Ghir_D01G020580	GO:0000023
Ghir_D09G020380	GO:0000023
Ghir_D08G028050	GO:0000023
Ghir_D05G023860	GO:0000023
Ghir_D11G007350	GO:0000023
Ghir_D01G023450	GO:0000023
Ghir_A11G000640	GO:0000023
Ghir_D11G017260	GO:0000023
Ghir_D13G001840	GO:0000023
Ghir_D13G005930	GO:0000023
Ghir_D09G017770	GO:0000023
Ghir_A02G015410	GO:0000023
Ghir_D04G001270	GO:0000023
Ghir_A09G018270	GO:0000023
Ghir_D10G000360	GO:0000023
Ghir_A05G039610	GO:0000023
Ghir_A11G020410	GO:0000023
Ghir_D11G028870	GO:0000023
Ghir_D01G019920	GO:0000023
Ghir_D13G010550	GO:0000023
Ghir_D12G005950	GO:0000023
Ghir_D02G013050	GO:0000023
Ghir_D02G021220	GO:0000023
Ghir_A01G014480	GO:0000023
Ghir_D12G007700	GO:0000023
Ghir_A11G007370	GO:0000023
Ghir_A13G010110	GO:0000023
Ghir_D01G015690	GO:0000023
Ghir_D12G001220	GO:0000023
Ghir_A07G017550	GO:0000023
Ghir_D13G017030	GO:0000023
Ghir_D11G013040	GO:0000023
Ghir_A11G009560	GO:0000023
Ghir_A09G002630	GO:0000023
Ghir_A05G014930	GO:0000023
Ghir_D12G022580	GO:0000023
Ghir_A09G001740	GO:0000023
Ghir_D05G029570	GO:0000023
Ghir_D05G014760	GO:0000023
Ghir_A11G035450	GO:0000023
Ghir_A05G036800	GO:0000023
Ghir_A13G016310	GO:0000023
Ghir_A11G023930	GO:0000023
Ghir_A03G019820	GO:0000023
Ghir_D09G001630	GO:0000023
Ghir_A13G006360	GO:0000023
Ghir_D11G009530	GO:0000023
Ghir_A12G001210	GO:0000023
Ghir_A12G022530	GO:0000024
Ghir_D12G022510	GO:0000024
Ghir_D11G002960	GO:0000024
Ghir_A11G002950	GO:0000024
Ghir_A02G014960	GO:0000025
Ghir_D03G004640	GO:0000025
Ghir_D06G016240	GO:0000028
Ghir_A10G004910	GO:0000028
Ghir_A06G015450	GO:0000028
Ghir_D10G005710	GO:0000028
Ghir_D06G008660	GO:0000030
Ghir_A02G007480	GO:0000033
Ghir_D12G001090	GO:0000033
Ghir_A12G001080	GO:0000033
Ghir_A05G001390	GO:0000035
Ghir_A08G009110	GO:0000035
Ghir_D08G009940	GO:0000035
Ghir_D05G001550	GO:0000035
Ghir_A06G005400	GO:0000035
Ghir_D06G005410	GO:0000035
Ghir_D08G006240	GO:0000036
Ghir_A08G006080	GO:0000036
Ghir_A01G006420	GO:0000036
Ghir_D13G010660	GO:0000036
Ghir_D13G020960	GO:0000038
Ghir_A07G014230	GO:0000038
Ghir_D11G016170	GO:0000038
Ghir_A08G025940	GO:0000038
Ghir_D02G022820	GO:0000038
Ghir_A09G008310	GO:0000038
Ghir_D07G014480	GO:0000038
Ghir_D10G000350	GO:0000038
Ghir_D08G026810	GO:0000038
Ghir_D10G000670	GO:0000038
Ghir_A03G021340	GO:0000038
Ghir_D13G021070	GO:0000038
Ghir_A13G020120	GO:0000038
Ghir_A08G026490	GO:0000038
Ghir_D06G008590	GO:0000038
Ghir_A09G008600	GO:0000038
Ghir_A11G016120	GO:0000038
Ghir_D01G000510	GO:0000038
Ghir_D06G015490	GO:0000038
Ghir_D09G008320	GO:0000038
Ghir_A06G008600	GO:0000038
Ghir_A01G000510	GO:0000038
Ghir_D01G019360	GO:0000038
Ghir_D12G012680	GO:0000038
Ghir_A01G017870	GO:0000038
Ghir_A13G020230	GO:0000038
Ghir_D06G008840	GO:0000038
Ghir_A08G024790	GO:0000038
Ghir_D08G013910	GO:0000038
Ghir_A06G008390	GO:0000038
Ghir_A12G012450	GO:0000038
Ghir_A07G016270	GO:0000038
Ghir_A01G006420	GO:0000038
Ghir_D02G017570	GO:0000038
Ghir_A13G021960	GO:0000038
Ghir_D08G025680	GO:0000038
Ghir_D01G000500	GO:0000038
Ghir_A05G016240	GO:0000038
Ghir_D07G016580	GO:0000038
Ghir_D13G010660	GO:0000038
Ghir_A01G000530	GO:0000038
Ghir_A03G016310	GO:0000038
Ghir_A05G008910	GO:0000041
Ghir_D05G008900	GO:0000041
Ghir_D09G023860	GO:0000041
Ghir_A07G016510	GO:0000041
Ghir_D07G011090	GO:0000041
Ghir_D10G017480	GO:0000041
Ghir_A07G011710	GO:0000041
Ghir_D05G001910	GO:0000041
Ghir_D02G004490	GO:0000041
Ghir_D01G017670	GO:0000041
Ghir_D07G011770	GO:0000041
Ghir_D02G004200	GO:0000041
Ghir_D09G008230	GO:0000041
Ghir_A07G011080	GO:0000041
Ghir_D13G019090	GO:0000041
Ghir_A12G022350	GO:0000041
Ghir_D03G012980	GO:0000041
Ghir_D05G039330	GO:0000041
Ghir_A09G009670	GO:0000041
Ghir_D09G009400	GO:0000041
Ghir_A05G001710	GO:0000041
Ghir_D11G027370	GO:0000041
Ghir_A03G005900	GO:0000041
Ghir_A09G024710	GO:0000041
Ghir_A13G018460	GO:0000041
Ghir_D07G016840	GO:0000041
Ghir_A01G021780	GO:0000041
Ghir_A01G018410	GO:0000041
Ghir_A01G021750	GO:0000041
Ghir_A13G005990	GO:0000041
Ghir_D11G028410	GO:0000041
Ghir_A09G008520	GO:0000041
Ghir_D09G023090	GO:0000041
Ghir_A11G035440	GO:0000041
Ghir_A01G016130	GO:0000041
Ghir_D01G019690	GO:0000041
Ghir_A09G023910	GO:0000041
Ghir_D13G009830	GO:0000041
Ghir_A01G018470	GO:0000041
Ghir_A01G008470	GO:0000041
Ghir_D05G009150	GO:0000041
Ghir_D01G023290	GO:0000041
Ghir_D01G023260	GO:0000041
Ghir_D12G022330	GO:0000041
Ghir_A02G003840	GO:0000041
Ghir_A13G009130	GO:0000041
Ghir_A05G009150	GO:0000041
Ghir_A01G018460	GO:0000041
Ghir_A09G013700	GO:0000041
Ghir_A10G012320	GO:0000041
Ghir_D01G019680	GO:0000041
Ghir_D01G008930	GO:0000041
Ghir_A11G028230	GO:0000041
Ghir_D10G015470	GO:0000041
Ghir_D09G013180	GO:0000041
Ghir_A10G009750	GO:0000042
Ghir_A04G009630	GO:0000042
Ghir_D10G009450	GO:0000042
Ghir_A08G013370	GO:0000045
Ghir_D08G014150	GO:0000045
Ghir_A05G041840	GO:0000045
Ghir_D04G001090	GO:0000045
Ghir_D09G006840	GO:0000049
Ghir_D01G001390	GO:0000049
Ghir_A04G013600	GO:0000049
Ghir_A10G012880	GO:0000049
Ghir_A10G018470	GO:0000049
Ghir_D10G021360	GO:0000049
Ghir_A10G005170	GO:0000049
Ghir_A10G019650	GO:0000049
Ghir_D10G019980	GO:0000049
Ghir_A10G013930	GO:0000049
Ghir_A09G007130	GO:0000049
Ghir_D09G020850	GO:0000049
Ghir_D10G013630	GO:0000049
Ghir_A01G001390	GO:0000049
Ghir_D04G018000	GO:0000049
Ghir_A09G021500	GO:0000049
Ghir_D02G024010	GO:0000049
Ghir_A03G022560	GO:0000049
Ghir_D10G005980	GO:0000049
Ghir_A12G028090	GO:0000055
Ghir_D12G028240	GO:0000055
Ghir_A05G031830	GO:0000059
Ghir_A12G016810	GO:0000059
Ghir_D01G017830	GO:0000059
Ghir_D07G018980	GO:0000059
Ghir_A07G014500	GO:0000059
Ghir_A01G022040	GO:0000059
Ghir_A12G026160	GO:0000059
Ghir_D12G026150	GO:0000059
Ghir_D05G031750	GO:0000059
Ghir_A09G019300	GO:0000059
Ghir_D12G026160	GO:0000059
Ghir_D11G027000	GO:0000059
Ghir_D01G023580	GO:0000059
Ghir_D07G014770	GO:0000059
Ghir_D12G017070	GO:0000059
Ghir_D09G018820	GO:0000059
Ghir_D09G018810	GO:0000059
Ghir_A10G019680	GO:0000059
Ghir_D10G021410	GO:0000059
Ghir_A04G010110	GO:0000059
Ghir_D04G014330	GO:0000059
Ghir_A09G019310	GO:0000059
Ghir_A12G026150	GO:0000059
Ghir_A01G000200	GO:0000059
Ghir_D01G000210	GO:0000059
Ghir_A01G016320	GO:0000059
Ghir_A01G011750	GO:0000060
Ghir_D11G029020	GO:0000062
Ghir_A07G001520	GO:0000062
Ghir_A11G033230	GO:0000062
Ghir_D13G011980	GO:0000062
Ghir_A11G028840	GO:0000062
Ghir_D11G033840	GO:0000062
Ghir_A11G023080	GO:0000062
Ghir_D11G033830	GO:0000062
Ghir_D04G009520	GO:0000062
Ghir_D13G019260	GO:0000062
Ghir_D09G018830	GO:0000062
Ghir_D11G032680	GO:0000062
Ghir_A11G033220	GO:0000062
Ghir_A13G011410	GO:0000062
Ghir_A11G032190	GO:0000062
Ghir_D07G001540	GO:0000062
Ghir_A12G007920	GO:0000062
Ghir_A13G018620	GO:0000062
Ghir_D09G008720	GO:0000064
Ghir_A10G007770	GO:0000064
Ghir_A09G009050	GO:0000064
Ghir_D10G007510	GO:0000064
Ghir_D05G016300	GO:0000064
Ghir_A05G016480	GO:0000064
Ghir_D11G029130	GO:0000077
Ghir_D12G018370	GO:0000077
Ghir_A11G028950	GO:0000077
Ghir_A12G018090	GO:0000077
Ghir_D06G012990	GO:0000077
Ghir_A06G011620	GO:0000077
Ghir_D08G007290	GO:0000079
Ghir_A08G007240	GO:0000079
Ghir_A10G008050	GO:0000079
Ghir_A11G014910	GO:0000079
Ghir_D12G010430	GO:0000079
Ghir_A05G025830	GO:0000079
Ghir_D08G015650	GO:0000079
Ghir_A01G012260	GO:0000079
Ghir_A11G013080	GO:0000079
Ghir_D11G008460	GO:0000079
Ghir_A06G002160	GO:0000079
Ghir_D05G024100	GO:0000079
Ghir_D09G008950	GO:0000079
Ghir_D12G010720	GO:0000079
Ghir_D12G002120	GO:0000079
Ghir_D08G022730	GO:0000079
Ghir_A11G008140	GO:0000079
Ghir_A08G014520	GO:0000079
Ghir_A02G011860	GO:0000079
Ghir_A05G024240	GO:0000079
Ghir_D01G002260	GO:0000079
Ghir_A11G008470	GO:0000079
Ghir_D11G028990	GO:0000079
Ghir_A08G006230	GO:0000079
Ghir_A02G019280	GO:0000079
Ghir_D05G021200	GO:0000079
Ghir_A12G020820	GO:0000079
Ghir_A03G012510	GO:0000079
Ghir_D11G008140	GO:0000079
Ghir_A08G014850	GO:0000079
Ghir_D12G029520	GO:0000079
Ghir_D03G000280	GO:0000079
Ghir_A03G018070	GO:0000079
Ghir_A05G021250	GO:0000079
Ghir_A08G021980	GO:0000079
Ghir_D05G025840	GO:0000079
Ghir_D03G006870	GO:0000079
Ghir_D11G013030	GO:0000079
Ghir_D08G015360	GO:0000079
Ghir_D01G010120	GO:0000079
Ghir_D07G010080	GO:0000079
Ghir_A12G010520	GO:0000079
Ghir_D10G005280	GO:0000079
Ghir_D11G014990	GO:0000079
Ghir_D02G019380	GO:0000079
Ghir_D01G012840	GO:0000079
Ghir_A01G022570	GO:0000079
Ghir_A11G028800	GO:0000079
Ghir_A07G010040	GO:0000079
Ghir_A01G016710	GO:0000079
Ghir_A02G008840	GO:0000082
Ghir_D04G001800	GO:0000082
Ghir_D04G001790	GO:0000082
Ghir_D05G028960	GO:0000082
Ghir_A05G028930	GO:0000082
Ghir_A05G041160	GO:0000082
Ghir_D02G009190	GO:0000082
Ghir_D04G001460	GO:0000085
Ghir_D08G002360	GO:0000085
Ghir_A08G002250	GO:0000085
Ghir_A05G026380	GO:0000085
Ghir_D08G022320	GO:0000085
Ghir_D09G021150	GO:0000085
Ghir_D03G018150	GO:0000085
Ghir_D05G014910	GO:0000085
Ghir_A10G016490	GO:0000085
Ghir_A01G022060	GO:0000085
Ghir_D11G008320	GO:0000085
Ghir_D06G010100	GO:0000085
Ghir_D07G001580	GO:0000085
Ghir_D05G006240	GO:0000085
Ghir_A11G001150	GO:0000085
Ghir_A09G008070	GO:0000085
Ghir_D06G001590	GO:0000085
Ghir_A03G009470	GO:0000085
Ghir_D11G009190	GO:0000085
Ghir_A05G041490	GO:0000085
Ghir_D10G012750	GO:0000085
Ghir_D11G025280	GO:0000085
Ghir_A06G001720	GO:0000085
Ghir_A09G021870	GO:0000085
Ghir_D08G014490	GO:0000085
Ghir_D03G011440	GO:0000085
Ghir_D08G011020	GO:0000085
Ghir_A05G035240	GO:0000085
Ghir_A13G013450	GO:0000085
Ghir_D01G011420	GO:0000085
Ghir_D12G019710	GO:0000085
Ghir_A11G008350	GO:0000085
Ghir_A09G003840	GO:0000085
Ghir_A13G011320	GO:0000085
Ghir_D06G011750	GO:0000085
Ghir_D07G004070	GO:0000085
Ghir_D10G009130	GO:0000085
Ghir_A06G009750	GO:0000085
Ghir_A03G001050	GO:0000085
Ghir_D05G008270	GO:0000085
Ghir_D02G009640	GO:0000085
Ghir_A10G008000	GO:0000085
Ghir_A11G009220	GO:0000085
Ghir_A06G012620	GO:0000085
Ghir_D07G000730	GO:0000085
Ghir_A09G004240	GO:0000085
Ghir_D07G003700	GO:0000085
Ghir_A05G001770	GO:0000085
Ghir_A03G005090	GO:0000085
Ghir_D13G019810	GO:0000085
Ghir_D08G003660	GO:0000085
Ghir_D11G032840	GO:0000085
Ghir_A13G019090	GO:0000085
Ghir_D12G011470	GO:0000085
Ghir_A12G011260	GO:0000085
Ghir_A05G006690	GO:0000085
Ghir_D12G010630	GO:0000085
Ghir_D05G033710	GO:0000085
Ghir_D10G011340	GO:0000085
Ghir_D09G003760	GO:0000085
Ghir_A10G018470	GO:0000085
Ghir_A05G017560	GO:0000085
Ghir_D02G014170	GO:0000085
Ghir_A05G008260	GO:0000085
Ghir_D03G004990	GO:0000085
Ghir_D11G001170	GO:0000085
Ghir_D05G006760	GO:0000085
Ghir_A11G032360	GO:0000085
Ghir_A08G021560	GO:0000085
Ghir_A08G014620	GO:0000085
Ghir_D07G012600	GO:0000085
Ghir_A03G008910	GO:0000085
Ghir_D01G002330	GO:0000085
Ghir_D10G019980	GO:0000085
Ghir_D10G017960	GO:0000085
Ghir_A01G010410	GO:0000085
Ghir_D04G008400	GO:0000085
Ghir_D12G020850	GO:0000085
Ghir_A07G001560	GO:0000085
Ghir_A08G013630	GO:0000085
Ghir_D11G028170	GO:0000085
Ghir_D02G009400	GO:0000085
Ghir_A06G011050	GO:0000085
Ghir_A07G004030	GO:0000085
Ghir_D08G015450	GO:0000085
Ghir_D06G012050	GO:0000085
Ghir_D05G026410	GO:0000085
Ghir_A12G019450	GO:0000085
Ghir_A09G026010	GO:0000085
Ghir_A11G027990	GO:0000085
Ghir_A10G016280	GO:0000085
Ghir_A01G002420	GO:0000085
Ghir_A07G003690	GO:0000085
Ghir_A10G014810	GO:0000085
Ghir_A03G007300	GO:0000085
Ghir_D09G004610	GO:0000085
Ghir_D09G025150	GO:0000085
Ghir_D10G008970	GO:0000085
Ghir_D13G014160	GO:0000085
Ghir_A08G011060	GO:0000085
Ghir_A02G015340	GO:0000085
Ghir_A10G010140	GO:0000085
Ghir_D05G025030	GO:0000095
Ghir_A05G008570	GO:0000096
Ghir_A09G018050	GO:0000096
Ghir_A08G025940	GO:0000096
Ghir_D09G017510	GO:0000096
Ghir_D11G000150	GO:0000096
Ghir_A09G008310	GO:0000096
Ghir_D06G001120	GO:0000096
Ghir_D08G026810	GO:0000096
Ghir_A08G020690	GO:0000096
Ghir_D11G026310	GO:0000096
Ghir_D13G021070	GO:0000096
Ghir_A11G026180	GO:0000096
Ghir_A11G000090	GO:0000096
Ghir_D13G023140	GO:0000096
Ghir_D06G008590	GO:0000096
Ghir_D05G022760	GO:0000096
Ghir_A06G001250	GO:0000096
Ghir_D13G023390	GO:0000096
Ghir_A01G017210	GO:0000096
Ghir_A13G020230	GO:0000096
Ghir_A13G005370	GO:0000096
Ghir_D06G001110	GO:0000096
Ghir_D13G007020	GO:0000096
Ghir_D06G012660	GO:0000096
Ghir_A06G011860	GO:0000096
Ghir_A06G008390	GO:0000096
Ghir_A13G022400	GO:0000096
Ghir_D06G001100	GO:0000096
Ghir_D08G021480	GO:0000096
Ghir_A05G022840	GO:0000096
Ghir_A05G003420	GO:0000097
Ghir_A05G033550	GO:0000103
Ghir_D13G019050	GO:0000103
Ghir_D04G005340	GO:0000103
Ghir_D12G008890	GO:0000103
Ghir_A05G031220	GO:0000103
Ghir_A12G008650	GO:0000103
Ghir_A11G032320	GO:0000103
Ghir_D09G022690	GO:0000103
Ghir_A09G023450	GO:0000103
Ghir_D11G032800	GO:0000103
Ghir_D05G019140	GO:0000103
Ghir_A13G018410	GO:0000103
Ghir_A05G037710	GO:0000103
Ghir_A09G002250	GO:0000103
Ghir_A13G010040	GO:0000103
Ghir_D02G004000	GO:0000103
Ghir_A02G003600	GO:0000103
Ghir_D05G033300	GO:0000103
Ghir_D05G031090	GO:0000103
Ghir_D09G002160	GO:0000103
Ghir_A05G019120	GO:0000103
Ghir_D10G015000	GO:0000104
Ghir_A10G012740	GO:0000104
Ghir_D09G022260	GO:0000105
Ghir_D10G019940	GO:0000105
Ghir_A10G018440	GO:0000105
Ghir_A09G023040	GO:0000105
Ghir_A11G007390	GO:0000105
Ghir_D02G023020	GO:0000105
Ghir_A09G012610	GO:0000105
Ghir_D13G013830	GO:0000105
Ghir_A13G013110	GO:0000105
Ghir_A04G006890	GO:0000105
Ghir_A10G018430	GO:0000105
Ghir_D12G008440	GO:0000105
Ghir_D12G004360	GO:0000105
Ghir_D04G019080	GO:0000105
Ghir_A03G021530	GO:0000105
Ghir_D09G012110	GO:0000105
Ghir_D11G007380	GO:0000105
Ghir_D11G022780	GO:0000105
Ghir_D07G016730	GO:0000105
Ghir_D04G010890	GO:0000105
Ghir_A12G004410	GO:0000105
Ghir_A09G005880	GO:0000105
Ghir_D09G005460	GO:0000105
Ghir_A13G013120	GO:0000105
Ghir_A04G014400	GO:0000105
Ghir_D10G019940	GO:0000107
Ghir_A10G018440	GO:0000107
Ghir_A11G007390	GO:0000107
Ghir_A10G018430	GO:0000107
Ghir_D11G007380	GO:0000107
Ghir_A11G020940	GO:0000123
Ghir_A11G013440	GO:0000123
Ghir_D11G013430	GO:0000123
Ghir_A02G015040	GO:0000123
Ghir_D03G004730	GO:0000123
Ghir_D05G014110	GO:0000124
Ghir_A08G023920	GO:0000139
Ghir_D13G007140	GO:0000139
Ghir_A02G015120	GO:0000139
Ghir_A11G022550	GO:0000139
Ghir_A11G025110	GO:0000139
Ghir_D12G029540	GO:0000139
Ghir_A13G006440	GO:0000139
Ghir_A12G014090	GO:0000139
Ghir_D07G024200	GO:0000139
Ghir_D13G005770	GO:0000139
Ghir_D03G004800	GO:0000139
Ghir_A08G008130	GO:0000139
Ghir_D08G024830	GO:0000139
Ghir_A07G007980	GO:0000139
Ghir_A05G027660	GO:0000139
Ghir_A05G024960	GO:0000139
Ghir_D08G003510	GO:0000139
Ghir_A08G003430	GO:0000139
Ghir_D11G010170	GO:0000139
Ghir_D13G010690	GO:0000139
Ghir_D11G005810	GO:0000139
Ghir_D12G001370	GO:0000139
Ghir_A11G035600	GO:0000139
Ghir_D05G027680	GO:0000139
Ghir_A05G036890	GO:0000139
Ghir_D05G025000	GO:0000139
Ghir_A12G001340	GO:0000139
Ghir_D11G006020	GO:0000139
Ghir_D11G023080	GO:0000139
Ghir_D07G008070	GO:0000139
Ghir_D06G020860	GO:0000139
Ghir_D05G038460	GO:0000139
Ghir_D11G021840	GO:0000139
Ghir_A01G007650	GO:0000139
Ghir_A07G015630	GO:0000139
Ghir_A11G021420	GO:0000139
Ghir_D08G027850	GO:0000139
Ghir_A11G006060	GO:0000139
Ghir_D11G008600	GO:0000139
Ghir_D12G012140	GO:0000139
Ghir_D11G036470	GO:0000139
Ghir_A12G011940	GO:0000139
Ghir_D11G025260	GO:0000139
Ghir_A11G008620	GO:0000139
Ghir_D12G014200	GO:0000139
Ghir_D01G008000	GO:0000139
Ghir_D07G015900	GO:0000139
Ghir_D03G019170	GO:0000139
Ghir_A13G007100	GO:0000139
Ghir_A11G005860	GO:0000139
Ghir_D04G006170	GO:0000139
Ghir_A06G019740	GO:0000139
Ghir_A05G025410	GO:0000145
Ghir_D05G025570	GO:0000145
Ghir_D10G006150	GO:0000145
Ghir_A13G019220	GO:0000145
Ghir_A07G025180	GO:0000145
Ghir_D13G019950	GO:0000145
Ghir_D05G009770	GO:0000145
Ghir_A09G000960	GO:0000145
Ghir_D11G023810	GO:0000145
Ghir_D10G022440	GO:0000145
Ghir_D05G026490	GO:0000145
Ghir_D05G014170	GO:0000145
Ghir_D07G010360	GO:0000145
Ghir_A03G003290	GO:0000145
Ghir_A10G006540	GO:0000145
Ghir_A10G005310	GO:0000145
Ghir_A09G014360	GO:0000145
Ghir_D12G020310	GO:0000145
Ghir_D09G000940	GO:0000145
Ghir_D11G012140	GO:0000145
Ghir_D01G012710	GO:0000145
Ghir_A10G020130	GO:0000145
Ghir_A03G006210	GO:0000145
Ghir_D13G013290	GO:0000145
Ghir_D03G014390	GO:0000145
Ghir_A13G025010	GO:0000145
Ghir_D12G014110	GO:0000145
Ghir_D10G021830	GO:0000145
Ghir_D03G015760	GO:0000145
Ghir_D04G012740	GO:0000145
Ghir_A05G038410	GO:0000145
Ghir_D12G029040	GO:0000145
Ghir_D03G012650	GO:0000145
Ghir_A05G014380	GO:0000145
Ghir_D05G021500	GO:0000145
Ghir_D10G011420	GO:0000145
Ghir_A12G028890	GO:0000145
Ghir_A11G023510	GO:0000145
Ghir_A03G004500	GO:0000145
Ghir_A09G005410	GO:0000145
Ghir_A04G008660	GO:0000145
Ghir_D04G004660	GO:0000145
Ghir_D09G013830	GO:0000145
Ghir_A13G019210	GO:0000145
Ghir_A05G021560	GO:0000145
Ghir_D09G004890	GO:0000145
Ghir_A12G014000	GO:0000145
Ghir_D01G022700	GO:0000145
Ghir_A12G020060	GO:0000145
Ghir_A01G021130	GO:0000145
Ghir_A11G035160	GO:0000145
Ghir_A08G008350	GO:0000148
Ghir_D02G003660	GO:0000148
Ghir_A02G003340	GO:0000148
Ghir_D13G006880	GO:0000148
Ghir_D08G001760	GO:0000148
Ghir_A04G011150	GO:0000148
Ghir_A02G003280	GO:0000148
Ghir_D10G011570	GO:0000148
Ghir_A05G039230	GO:0000148
Ghir_D11G032130	GO:0000148
Ghir_D05G016530	GO:0000148
Ghir_D08G008440	GO:0000148
Ghir_A03G017410	GO:0000148
Ghir_D03G011400	GO:0000148
Ghir_D02G018670	GO:0000148
Ghir_A13G005500	GO:0000148
Ghir_A08G008370	GO:0000148
Ghir_A10G015950	GO:0000148
Ghir_D02G003640	GO:0000148
Ghir_D04G015490	GO:0000148
Ghir_A10G016000	GO:0000148
Ghir_A03G007330	GO:0000148
Ghir_D10G011600	GO:0000148
Ghir_D08G008430	GO:0000148
Ghir_A11G031780	GO:0000148
Ghir_D04G003850	GO:0000148
Ghir_A08G001700	GO:0000148
Ghir_D04G015480	GO:0000148
Ghir_A12G017410	GO:0000149
Ghir_A07G015630	GO:0000149
Ghir_D12G017620	GO:0000149
Ghir_D11G008600	GO:0000149
Ghir_A11G008620	GO:0000149
Ghir_D07G015900	GO:0000149
Ghir_A08G014340	GO:0000150
Ghir_A07G010160	GO:0000150
Ghir_D08G015220	GO:0000150
Ghir_D07G010180	GO:0000150
Ghir_A12G008670	GO:0000151
Ghir_A05G008970	GO:0000151
Ghir_A09G025590	GO:0000151
Ghir_A11G015040	GO:0000151
Ghir_D10G002210	GO:0000151
Ghir_A07G014390	GO:0000151
Ghir_D12G008780	GO:0000151
Ghir_A09G009790	GO:0000151
Ghir_D09G013740	GO:0000151
Ghir_A09G010810	GO:0000151
Ghir_A06G014350	GO:0000151
Ghir_D09G010560	GO:0000151
Ghir_D06G002240	GO:0000151
Ghir_D01G021910	GO:0000151
Ghir_D09G001170	GO:0000151
Ghir_A01G019460	GO:0000151
Ghir_A05G008090	GO:0000151
Ghir_D01G016390	GO:0000151
Ghir_A01G009480	GO:0000151
Ghir_A13G002560	GO:0000151
Ghir_D05G009560	GO:0000151
Ghir_A03G012540	GO:0000151
Ghir_A01G021300	GO:0000151
Ghir_A07G021330	GO:0000151
Ghir_A07G004860	GO:0000151
Ghir_A03G014270	GO:0000151
Ghir_A02G004350	GO:0000151
Ghir_A01G014670	GO:0000151
Ghir_A07G022950	GO:0000151
Ghir_D01G015920	GO:0000151
Ghir_A13G003920	GO:0000151
Ghir_A01G002640	GO:0000151
Ghir_A07G004230	GO:0000151
Ghir_D11G015100	GO:0000151
Ghir_A01G020400	GO:0000151
Ghir_A01G023100	GO:0000151
Ghir_A09G024210	GO:0000151
Ghir_D01G002570	GO:0000151
Ghir_A05G009840	GO:0000151
Ghir_D01G020940	GO:0000151
Ghir_A10G017960	GO:0000151
Ghir_D09G009500	GO:0000151
Ghir_D02G022070	GO:0000151
Ghir_D01G009910	GO:0000151
Ghir_D12G008870	GO:0000151
Ghir_D13G004120	GO:0000151
Ghir_D07G021510	GO:0000151
Ghir_A05G002570	GO:0000151
Ghir_D07G010580	GO:0000151
Ghir_D09G022840	GO:0000151
Ghir_A10G003110	GO:0000151
Ghir_D10G012400	GO:0000151
Ghir_A03G004920	GO:0000151
Ghir_D13G002850	GO:0000151
Ghir_D09G024740	GO:0000151
Ghir_A03G017070	GO:0000151
Ghir_A08G012510	GO:0000151
Ghir_A03G013810	GO:0000151
Ghir_D10G010860	GO:0000151
Ghir_D12G028790	GO:0000151
Ghir_D02G004680	GO:0000151
Ghir_D02G018330	GO:0000151
Ghir_D09G008020	GO:0000151
Ghir_A10G015160	GO:0000151
Ghir_D07G014650	GO:0000151
Ghir_D06G015110	GO:0000151
Ghir_D08G013170	GO:0000151
Ghir_D02G014080	GO:0000151
Ghir_D02G000500	GO:0000151
Ghir_D08G022890	GO:0000151
Ghir_A10G001390	GO:0000151
Ghir_A11G015030	GO:0000151
Ghir_A09G014280	GO:0000151
Ghir_A09G001210	GO:0000151
Ghir_D04G009960	GO:0000151
Ghir_A01G022560	GO:0000151
Ghir_D05G032050	GO:0000151
Ghir_A12G028640	GO:0000151
Ghir_A09G008280	GO:0000151
Ghir_D07G012140	GO:0000151
Ghir_A09G014270	GO:0000151
Ghir_D05G002710	GO:0000151
Ghir_D02G015630	GO:0000151
Ghir_A12G008740	GO:0000151
Ghir_D11G015110	GO:0000151
Ghir_A07G017020	GO:0000151
Ghir_D03G013860	GO:0000151
Ghir_A10G003100	GO:0000151
Ghir_A05G026770	GO:0000151
Ghir_D10G003910	GO:0000151
Ghir_A03G020660	GO:0000151
Ghir_D09G010550	GO:0000151
Ghir_A09G010820	GO:0000151
Ghir_A06G014140	GO:0000151
Ghir_D09G023360	GO:0000151
Ghir_D10G026760	GO:0000151
Ghir_A07G010540	GO:0000151
Ghir_A01G016720	GO:0000151
Ghir_A07G012070	GO:0000151
Ghir_A10G008420	GO:0000151
Ghir_D10G022550	GO:0000151
Ghir_A02G009760	GO:0000151
Ghir_D07G004890	GO:0000151
Ghir_A03G022690	GO:0000151
Ghir_D07G017490	GO:0000151
Ghir_D07G004240	GO:0000151
Ghir_A07G017000	GO:0000151
Ghir_D06G022990	GO:0000151
Ghir_A06G002380	GO:0000151
Ghir_A10G020720	GO:0000151
Ghir_D01G018310	GO:0000151
Ghir_A10G024320	GO:0000151
Ghir_D05G008140	GO:0000151
Ghir_D10G019490	GO:0000151
Ghir_A09G023610	GO:0000151
Ghir_D02G010270	GO:0000151
Ghir_D13G024800	GO:0000151
Ghir_D01G012540	GO:0000151
Ghir_A05G032140	GO:0000151
Ghir_A02G000500	GO:0000151
Ghir_A08G022130	GO:0000151
Ghir_D07G017510	GO:0000151
Ghir_D11G007660	GO:0000152
Ghir_A10G000590	GO:0000152
Ghir_A11G016200	GO:0000152
Ghir_D10G001350	GO:0000152
Ghir_D11G016270	GO:0000152
Ghir_A11G001120	GO:0000152
Ghir_D07G009420	GO:0000152
Ghir_A02G018450	GO:0000154
Ghir_A11G004800	GO:0000155
Ghir_A07G018060	GO:0000155
Ghir_D10G004340	GO:0000155
Ghir_A01G014800	GO:0000155
Ghir_D02G011820	GO:0000155
Ghir_A12G016520	GO:0000155
Ghir_D11G028510	GO:0000155
Ghir_A03G012530	GO:0000155
Ghir_D07G018100	GO:0000155
Ghir_A13G002650	GO:0000155
Ghir_A11G027200	GO:0000155
Ghir_A11G015850	GO:0000155
Ghir_A03G014940	GO:0000155
Ghir_A03G004320	GO:0000155
Ghir_A03G023740	GO:0000155
Ghir_A10G003550	GO:0000155
Ghir_D11G012040	GO:0000155
Ghir_D02G016380	GO:0000155
Ghir_A05G010200	GO:0000155
Ghir_A01G017450	GO:0000155
Ghir_A01G003600	GO:0000155
Ghir_D11G015880	GO:0000155
Ghir_D05G034270	GO:0000155
Ghir_D01G016100	GO:0000155
Ghir_A04G004940	GO:0000155
Ghir_D13G019120	GO:0000155
Ghir_A10G017640	GO:0000155
Ghir_D12G016740	GO:0000155
Ghir_D04G005860	GO:0000155
Ghir_A03G012790	GO:0000155
Ghir_D09G023080	GO:0000155
Ghir_D11G027350	GO:0000155
Ghir_A11G015910	GO:0000155
Ghir_D02G014100	GO:0000155
Ghir_D13G002940	GO:0000155
Ghir_D02G015340	GO:0000155
Ghir_A05G006470	GO:0000155
Ghir_D01G003630	GO:0000155
Ghir_D03G000830	GO:0000155
Ghir_A05G006500	GO:0000155
Ghir_A11G012090	GO:0000155
Ghir_D12G016310	GO:0000155
Ghir_D02G014090	GO:0000155
Ghir_A12G016090	GO:0000155
Ghir_D13G005930	GO:0000155
Ghir_D02G004190	GO:0000155
Ghir_D02G014040	GO:0000155
Ghir_A12G013850	GO:0000155
Ghir_A11G028330	GO:0000155
Ghir_A02G018780	GO:0000155
Ghir_D01G019010	GO:0000155
Ghir_A02G003830	GO:0000155
Ghir_D12G001220	GO:0000155
Ghir_D11G004710	GO:0000155
Ghir_D05G009930	GO:0000155
Ghir_A09G023900	GO:0000155
Ghir_D12G014000	GO:0000155
Ghir_D05G006580	GO:0000155
Ghir_D10G019100	GO:0000155
Ghir_D11G015950	GO:0000155
Ghir_A13G006360	GO:0000155
Ghir_A12G001210	GO:0000155
Ghir_A11G004800	GO:0000156
Ghir_D04G001660	GO:0000156
Ghir_A07G018060	GO:0000156
Ghir_A13G000270	GO:0000156
Ghir_A01G014800	GO:0000156
Ghir_D10G014310	GO:0000156
Ghir_D01G002860	GO:0000156
Ghir_D03G010390	GO:0000156
Ghir_A12G016520	GO:0000156
Ghir_A01G002910	GO:0000156
Ghir_D07G018100	GO:0000156
Ghir_A13G002650	GO:0000156
Ghir_A11G027200	GO:0000156
Ghir_A03G023740	GO:0000156
Ghir_D10G020440	GO:0000156
Ghir_D05G028460	GO:0000156
Ghir_D10G019860	GO:0000156
Ghir_D08G021010	GO:0000156
Ghir_A10G018360	GO:0000156
Ghir_A09G024980	GO:0000156
Ghir_A01G003600	GO:0000156
Ghir_D09G017330	GO:0000156
Ghir_D05G034270	GO:0000156
Ghir_D01G016100	GO:0000156
Ghir_D10G018760	GO:0000156
Ghir_A04G004940	GO:0000156
Ghir_D12G016740	GO:0000156
Ghir_D13G000440	GO:0000156
Ghir_D04G005860	GO:0000156
Ghir_A10G018350	GO:0000156
Ghir_A03G012790	GO:0000156
Ghir_D09G023080	GO:0000156
Ghir_A05G041300	GO:0000156
Ghir_D01G002850	GO:0000156
Ghir_A05G028450	GO:0000156
Ghir_A09G017860	GO:0000156
Ghir_D11G027350	GO:0000156
Ghir_A11G015910	GO:0000156
Ghir_D02G014100	GO:0000156
Ghir_D13G002940	GO:0000156
Ghir_D07G021900	GO:0000156
Ghir_A03G013230	GO:0000156
Ghir_A08G020170	GO:0000156
Ghir_D02G015340	GO:0000156
Ghir_A05G006470	GO:0000156
Ghir_D01G003630	GO:0000156
Ghir_D03G000830	GO:0000156
Ghir_A05G006500	GO:0000156
Ghir_D12G016310	GO:0000156
Ghir_D10G019850	GO:0000156
Ghir_D02G014090	GO:0000156
Ghir_A12G016090	GO:0000156
Ghir_D02G004190	GO:0000156
Ghir_A01G002900	GO:0000156
Ghir_D07G008670	GO:0000156
Ghir_A10G018480	GO:0000156
Ghir_A01G002890	GO:0000156
Ghir_D10G019990	GO:0000156
Ghir_A02G018780	GO:0000156
Ghir_A02G003830	GO:0000156
Ghir_D11G004710	GO:0000156
Ghir_D09G024180	GO:0000156
Ghir_A09G023900	GO:0000156
Ghir_D05G006580	GO:0000156
Ghir_A03G007900	GO:0000156
Ghir_A10G018930	GO:0000156
Ghir_D11G015950	GO:0000156
Ghir_D02G014470	GO:0000156
Ghir_D04G019710	GO:0000159
Ghir_A05G002180	GO:0000159
Ghir_A11G016290	GO:0000159
Ghir_D05G002340	GO:0000159
Ghir_D04G011960	GO:0000159
Ghir_A02G012960	GO:0000159
Ghir_D05G025500	GO:0000159
Ghir_A11G007170	GO:0000159
Ghir_A08G024930	GO:0000159
Ghir_D07G020230	GO:0000159
Ghir_D09G014820	GO:0000159
Ghir_D06G006390	GO:0000159
Ghir_A03G014500	GO:0000159
Ghir_A04G015040	GO:0000159
Ghir_D06G009690	GO:0000159
Ghir_D09G003580	GO:0000159
Ghir_D11G015830	GO:0000159
Ghir_A09G008850	GO:0000159
Ghir_D07G002370	GO:0000159
Ghir_A07G004370	GO:0000159
Ghir_A04G007870	GO:0000159
Ghir_A07G024320	GO:0000159
Ghir_D04G010250	GO:0000159
Ghir_D01G014160	GO:0000159
Ghir_A13G010850	GO:0000159
Ghir_D05G004640	GO:0000159
Ghir_D03G005830	GO:0000159
Ghir_A01G013440	GO:0000159
Ghir_D13G021810	GO:0000159
Ghir_D08G025820	GO:0000159
Ghir_D07G024370	GO:0000159
Ghir_A05G025480	GO:0000159
Ghir_A01G020520	GO:0000159
Ghir_D07G004420	GO:0000159
Ghir_A01G019210	GO:0000159
Ghir_A13G018180	GO:0000159
Ghir_A13G020990	GO:0000159
Ghir_A05G013830	GO:0000159
Ghir_A07G019940	GO:0000159
Ghir_D10G006680	GO:0000159
Ghir_D06G010360	GO:0000159
Ghir_D11G007120	GO:0000159
Ghir_D11G035810	GO:0000159
Ghir_A10G005850	GO:0000159
Ghir_A06G009340	GO:0000159
Ghir_A05G004530	GO:0000159
Ghir_A12G028620	GO:0000159
Ghir_A07G002360	GO:0000159
Ghir_D01G022040	GO:0000159
Ghir_D11G016360	GO:0000159
Ghir_D01G020670	GO:0000159
Ghir_A09G003650	GO:0000159
Ghir_D05G013570	GO:0000159
Ghir_D12G028770	GO:0000159
Ghir_D09G008510	GO:0000159
Ghir_A11G034950	GO:0000159
Ghir_D02G015900	GO:0000159
Ghir_A06G006300	GO:0000159
Ghir_A11G004800	GO:0000160
Ghir_D04G001660	GO:0000160
Ghir_A07G018060	GO:0000160
Ghir_A13G000270	GO:0000160
Ghir_D09G009040	GO:0000160
Ghir_D09G023860	GO:0000160
Ghir_D10G004340	GO:0000160
Ghir_A01G014800	GO:0000160
Ghir_D12G029540	GO:0000160
Ghir_A06G009640	GO:0000160
Ghir_D10G014310	GO:0000160
Ghir_D10G017480	GO:0000160
Ghir_D01G002860	GO:0000160
Ghir_D03G010390	GO:0000160
Ghir_D02G011820	GO:0000160
Ghir_A12G016520	GO:0000160
Ghir_D11G028510	GO:0000160
Ghir_A03G012530	GO:0000160
Ghir_D10G007100	GO:0000160
Ghir_A01G002910	GO:0000160
Ghir_D07G018100	GO:0000160
Ghir_A13G002650	GO:0000160
Ghir_A11G015850	GO:0000160
Ghir_A03G014940	GO:0000160
Ghir_D12G007160	GO:0000160
Ghir_A03G004320	GO:0000160
Ghir_A06G019960	GO:0000160
Ghir_A03G023740	GO:0000160
Ghir_A10G003550	GO:0000160
Ghir_D10G020440	GO:0000160
Ghir_A11G012730	GO:0000160
Ghir_D05G028460	GO:0000160
Ghir_D10G019860	GO:0000160
Ghir_D08G021010	GO:0000160
Ghir_A10G018360	GO:0000160
Ghir_A13G005320	GO:0000160
Ghir_D06G012900	GO:0000160
Ghir_A09G009330	GO:0000160
Ghir_A09G024980	GO:0000160
Ghir_D13G019090	GO:0000160
Ghir_D13G007380	GO:0000160
Ghir_D02G016380	GO:0000160
Ghir_A05G010200	GO:0000160
Ghir_A01G017450	GO:0000160
Ghir_D09G017330	GO:0000160
Ghir_A02G015000	GO:0000160
Ghir_A09G024710	GO:0000160
Ghir_D11G015880	GO:0000160
Ghir_A13G018460	GO:0000160
Ghir_D01G016100	GO:0000160
Ghir_D10G018760	GO:0000160
Ghir_D12G000670	GO:0000160
Ghir_D13G019120	GO:0000160
Ghir_D11G028410	GO:0000160
Ghir_A10G017640	GO:0000160
Ghir_D12G016740	GO:0000160
Ghir_D13G000440	GO:0000160
Ghir_D04G005860	GO:0000160
Ghir_D11G012670	GO:0000160
Ghir_A10G018350	GO:0000160
Ghir_A09G014720	GO:0000160
Ghir_A03G012790	GO:0000160
Ghir_A05G041300	GO:0000160
Ghir_D01G002850	GO:0000160
Ghir_A05G028450	GO:0000160
Ghir_A09G017860	GO:0000160
Ghir_A11G015910	GO:0000160
Ghir_D02G014100	GO:0000160
Ghir_D13G002940	GO:0000160
Ghir_A05G013610	GO:0000160
Ghir_A12G000690	GO:0000160
Ghir_D07G021900	GO:0000160
Ghir_A03G013230	GO:0000160
Ghir_A08G020170	GO:0000160
Ghir_D02G015340	GO:0000160
Ghir_A05G006470	GO:0000160
Ghir_D03G000830	GO:0000160
Ghir_A05G004780	GO:0000160
Ghir_A05G006500	GO:0000160
Ghir_D12G016310	GO:0000160
Ghir_D10G019850	GO:0000160
Ghir_D05G013350	GO:0000160
Ghir_D02G014090	GO:0000160
Ghir_A12G016090	GO:0000160
Ghir_D13G005930	GO:0000160
Ghir_D02G014040	GO:0000160
Ghir_A01G002900	GO:0000160
Ghir_D07G008670	GO:0000160
Ghir_A10G018480	GO:0000160
Ghir_D05G004890	GO:0000160
Ghir_D10G019990	GO:0000160
Ghir_A11G028330	GO:0000160
Ghir_A02G018780	GO:0000160
Ghir_D01G019010	GO:0000160
Ghir_A10G006260	GO:0000160
Ghir_D12G001220	GO:0000160
Ghir_D06G021100	GO:0000160
Ghir_D11G004710	GO:0000160
Ghir_D06G009970	GO:0000160
Ghir_D05G009930	GO:0000160
Ghir_D09G024180	GO:0000160
Ghir_D09G014400	GO:0000160
Ghir_A11G028230	GO:0000160
Ghir_D05G006580	GO:0000160
Ghir_A03G007900	GO:0000160
Ghir_A10G018930	GO:0000160
Ghir_D10G019100	GO:0000160
Ghir_D11G015950	GO:0000160
Ghir_A13G006360	GO:0000160
Ghir_A12G001210	GO:0000160
Ghir_D02G014470	GO:0000160
Ghir_A03G015190	GO:0000162
Ghir_D13G015250	GO:0000162
Ghir_A08G019710	GO:0000162
Ghir_D12G016720	GO:0000162
Ghir_A12G016500	GO:0000162
Ghir_A13G002700	GO:0000162
Ghir_A05G031220	GO:0000162
Ghir_A04G014860	GO:0000162
Ghir_A07G011120	GO:0000162
Ghir_D07G011130	GO:0000162
Ghir_D08G020600	GO:0000162
Ghir_A12G028830	GO:0000162
Ghir_D13G015260	GO:0000162
Ghir_D12G028980	GO:0000162
Ghir_D02G016590	GO:0000162
Ghir_A03G012570	GO:0000162
Ghir_A03G007860	GO:0000162
Ghir_D13G008270	GO:0000162
Ghir_A06G015830	GO:0000162
Ghir_D04G019540	GO:0000162
Ghir_D05G031090	GO:0000162
Ghir_A13G014560	GO:0000162
Ghir_A05G042350	GO:0000164
Ghir_A05G042310	GO:0000164
Ghir_A05G029970	GO:0000164
Ghir_D04G000590	GO:0000164
Ghir_D10G025380	GO:0000164
Ghir_A05G042300	GO:0000164
Ghir_A05G042330	GO:0000164
Ghir_A08G013280	GO:0000165
Ghir_A10G017660	GO:0000165
Ghir_D01G004070	GO:0000165
Ghir_A05G018610	GO:0000165
Ghir_D08G014900	GO:0000165
Ghir_D02G000440	GO:0000165
Ghir_D12G028300	GO:0000165
Ghir_D10G019480	GO:0000165
Ghir_A11G019680	GO:0000165
Ghir_A12G011610	GO:0000165
Ghir_D06G020770	GO:0000165
Ghir_A08G019610	GO:0000165
Ghir_A05G019500	GO:0000165
Ghir_A10G012910	GO:0000165
Ghir_A04G009230	GO:0000165
Ghir_A03G015220	GO:0000165
Ghir_A11G029730	GO:0000165
Ghir_D11G030390	GO:0000165
Ghir_A03G000170	GO:0000165
Ghir_A09G002790	GO:0000165
Ghir_D05G029470	GO:0000165
Ghir_D07G006240	GO:0000165
Ghir_D08G023160	GO:0000165
Ghir_D03G003510	GO:0000165
Ghir_A10G004640	GO:0000165
Ghir_D11G004790	GO:0000165
Ghir_D04G014430	GO:0000165
Ghir_D02G001040	GO:0000165
Ghir_D06G001120	GO:0000165
Ghir_D09G000670	GO:0000165
Ghir_D12G019300	GO:0000165
Ghir_D05G019530	GO:0000165
Ghir_D11G027900	GO:0000165
Ghir_D05G014590	GO:0000165
Ghir_D09G001660	GO:0000165
Ghir_A05G023670	GO:0000165
Ghir_D11G027610	GO:0000165
Ghir_D05G016290	GO:0000165
Ghir_D03G002700	GO:0000165
Ghir_A01G008650	GO:0000165
Ghir_D03G016240	GO:0000165
Ghir_A05G039110	GO:0000165
Ghir_D01G020910	GO:0000165
Ghir_D08G023100	GO:0000165
Ghir_A05G024460	GO:0000165
Ghir_A07G002310	GO:0000165
Ghir_A12G009080	GO:0000165
Ghir_A13G024460	GO:0000165
Ghir_A01G004150	GO:0000165
Ghir_A11G004460	GO:0000165
Ghir_A08G020690	GO:0000165
Ghir_A03G009650	GO:0000165
Ghir_A09G026330	GO:0000165
Ghir_D04G013370	GO:0000165
Ghir_A10G009500	GO:0000165
Ghir_D05G017190	GO:0000165
Ghir_A03G002780	GO:0000165
Ghir_D02G008300	GO:0000165
Ghir_A10G012900	GO:0000165
Ghir_A05G031220	GO:0000165
Ghir_A04G004710	GO:0000165
Ghir_D09G024310	GO:0000165
Ghir_D03G018930	GO:0000165
Ghir_A02G016030	GO:0000165
Ghir_D12G025200	GO:0000165
Ghir_A03G009110	GO:0000165
Ghir_A12G021710	GO:0000165
Ghir_D11G022210	GO:0000165
Ghir_A03G013650	GO:0000165
Ghir_D12G008300	GO:0000165
Ghir_D03G012150	GO:0000165
Ghir_A11G022160	GO:0000165
Ghir_A09G025930	GO:0000165
Ghir_A01G013020	GO:0000165
Ghir_D09G002770	GO:0000165
Ghir_D10G022010	GO:0000165
Ghir_D12G017630	GO:0000165
Ghir_A09G014590	GO:0000165
Ghir_A06G003070	GO:0000165
Ghir_A07G014910	GO:0000165
Ghir_A11G000370	GO:0000165
Ghir_A06G019650	GO:0000165
Ghir_D02G014850	GO:0000165
Ghir_A03G000430	GO:0000165
Ghir_D05G034460	GO:0000165
Ghir_D08G020900	GO:0000165
Ghir_A07G014930	GO:0000165
Ghir_A11G022170	GO:0000165
Ghir_A11G031670	GO:0000165
Ghir_D10G009760	GO:0000165
Ghir_A09G014240	GO:0000165
Ghir_D12G000700	GO:0000165
Ghir_D10G027370	GO:0000165
Ghir_A02G016320	GO:0000165
Ghir_A06G012930	GO:0000165
Ghir_A11G004890	GO:0000165
Ghir_A12G009660	GO:0000165
Ghir_D01G003550	GO:0000165
Ghir_D07G022120	GO:0000165
Ghir_D11G003710	GO:0000165
Ghir_D03G001230	GO:0000165
Ghir_D02G022720	GO:0000165
Ghir_A05G017620	GO:0000165
Ghir_D11G022250	GO:0000165
Ghir_D07G015230	GO:0000165
Ghir_A01G019410	GO:0000165
Ghir_A08G020060	GO:0000165
Ghir_A13G007800	GO:0000165
Ghir_A12G000720	GO:0000165
Ghir_D09G021870	GO:0000165
Ghir_D07G016560	GO:0000165
Ghir_A03G021240	GO:0000165
Ghir_D08G023530	GO:0000165
Ghir_A07G000970	GO:0000165
Ghir_A02G000440	GO:0000165
Ghir_D05G009950	GO:0000165
Ghir_D01G023820	GO:0000165
Ghir_D08G025150	GO:0000165
Ghir_A12G017420	GO:0000165
Ghir_A11G023700	GO:0000165
Ghir_A01G013120	GO:0000165
Ghir_A10G014830	GO:0000165
Ghir_A10G017650	GO:0000165
Ghir_A12G028150	GO:0000165
Ghir_A06G001250	GO:0000165
Ghir_A02G000970	GO:0000165
Ghir_A05G007850	GO:0000165
Ghir_A06G021630	GO:0000165
Ghir_A01G017210	GO:0000165
Ghir_D02G009830	GO:0000165
Ghir_D11G024040	GO:0000165
Ghir_D11G000440	GO:0000165
Ghir_D04G003230	GO:0000165
Ghir_A05G016470	GO:0000165
Ghir_A05G039820	GO:0000165
Ghir_A12G006400	GO:0000165
Ghir_D02G013070	GO:0000165
Ghir_D05G023540	GO:0000165
Ghir_A08G022300	GO:0000165
Ghir_D02G000240	GO:0000165
Ghir_A07G006240	GO:0000165
Ghir_A12G020680	GO:0000165
Ghir_D11G022240	GO:0000165
Ghir_D02G014560	GO:0000165
Ghir_A07G005190	GO:0000165
Ghir_D11G004360	GO:0000165
Ghir_D11G032050	GO:0000165
Ghir_A07G023610	GO:0000165
Ghir_D02G007820	GO:0000165
Ghir_A05G026010	GO:0000165
Ghir_A07G002570	GO:0000165
Ghir_D06G001110	GO:0000165
Ghir_A05G010220	GO:0000165
Ghir_A07G016250	GO:0000165
Ghir_D02G003100	GO:0000165
Ghir_D09G021710	GO:0000165
Ghir_A05G016530	GO:0000165
Ghir_A03G011560	GO:0000165
Ghir_A10G017950	GO:0000165
Ghir_D04G008310	GO:0000165
Ghir_D05G024290	GO:0000165
Ghir_D11G005550	GO:0000165
Ghir_A02G000960	GO:0000165
Ghir_D01G024120	GO:0000165
Ghir_A10G023390	GO:0000165
Ghir_D02G005900	GO:0000165
Ghir_D06G016470	GO:0000165
Ghir_A01G003530	GO:0000165
Ghir_D07G015250	GO:0000165
Ghir_A02G005530	GO:0000165
Ghir_D05G018630	GO:0000165
Ghir_D04G004000	GO:0000165
Ghir_A09G022620	GO:0000165
Ghir_D12G008420	GO:0000165
Ghir_A07G022020	GO:0000165
Ghir_D10G027360	GO:0000165
Ghir_D04G009970	GO:0000165
Ghir_A02G018380	GO:0000165
Ghir_D10G005430	GO:0000165
Ghir_D11G008210	GO:0000165
Ghir_D06G022710	GO:0000165
Ghir_D12G029380	GO:0000165
Ghir_D08G014030	GO:0000165
Ghir_D07G003370	GO:0000165
Ghir_D05G007900	GO:0000165
Ghir_D09G025470	GO:0000165
Ghir_D10G012720	GO:0000165
Ghir_D10G001500	GO:0000165
Ghir_D07G023710	GO:0000165
Ghir_D11G022220	GO:0000165
Ghir_A10G000750	GO:0000165
Ghir_D06G003070	GO:0000165
Ghir_D01G014020	GO:0000165
Ghir_D12G006420	GO:0000165
Ghir_A05G029380	GO:0000165
Ghir_D11G012660	GO:0000165
Ghir_A12G019080	GO:0000165
Ghir_A08G022350	GO:0000165
Ghir_A11G005590	GO:0000165
Ghir_D07G005200	GO:0000165
Ghir_D05G008620	GO:0000165
Ghir_D02G010280	GO:0000165
Ghir_A11G012720	GO:0000165
Ghir_D12G021720	GO:0000165
Ghir_D08G020190	GO:0000165
Ghir_A11G027470	GO:0000165
Ghir_D05G011500	GO:0000165
Ghir_A09G000700	GO:0000165
Ghir_D11G024730	GO:0000165
Ghir_A08G010130	GO:0000165
Ghir_D12G011790	GO:0000165
Ghir_D03G012970	GO:0000165
Ghir_D05G031090	GO:0000165
Ghir_D02G011170	GO:0000165
Ghir_D07G001000	GO:0000165
Ghir_A06G021960	GO:0000165
Ghir_A05G035130	GO:0000165
Ghir_A08G019290	GO:0000165
Ghir_D06G001100	GO:0000165
Ghir_A02G007350	GO:0000165
Ghir_A03G005890	GO:0000165
Ghir_A05G026620	GO:0000165
Ghir_A01G022270	GO:0000165
Ghir_A01G004010	GO:0000165
Ghir_D10G023680	GO:0000165
Ghir_D08G021480	GO:0000165
Ghir_A08G014580	GO:0000165
Ghir_D07G002570	GO:0000165
Ghir_D08G017930	GO:0000165
Ghir_A11G003760	GO:0000165
Ghir_D10G014840	GO:0000165
Ghir_D03G012100	GO:0000165
Ghir_A11G022180	GO:0000165
Ghir_D03G018650	GO:0000165
Ghir_D13G008130	GO:0000165
Ghir_A06G014970	GO:0000165
Ghir_D11G020530	GO:0000165
Ghir_A12G024480	GO:0000165
Ghir_D12G024470	GO:0000165
Ghir_D06G023760	GO:0000165
Ghir_A02G016930	GO:0000165
Ghir_A04G010200	GO:0000165
Ghir_D09G025080	GO:0000165
Ghir_A09G025170	GO:0000165
Ghir_A05G022340	GO:0000165
Ghir_A02G002700	GO:0000165
Ghir_D05G016170	GO:0000165
Ghir_A02G007890	GO:0000165
Ghir_A10G000920	GO:0000166
Ghir_D07G011590	GO:0000166
Ghir_A11G001830	GO:0000166
Ghir_A05G025840	GO:0000166
Ghir_D05G006790	GO:0000166
Ghir_D04G004440	GO:0000166
Ghir_A07G008350	GO:0000166
Ghir_D13G012980	GO:0000166
Ghir_D09G002710	GO:0000166
Ghir_D09G014230	GO:0000166
Ghir_A11G017650	GO:0000166
Ghir_D11G022620	GO:0000166
Ghir_A09G019450	GO:0000166
Ghir_A05G023720	GO:0000166
Ghir_D13G000320	GO:0000166
Ghir_D01G009710	GO:0000166
Ghir_D05G033360	GO:0000166
Ghir_D01G000420	GO:0000166
Ghir_D10G025320	GO:0000166
Ghir_A09G007800	GO:0000166
Ghir_D10G020910	GO:0000166
Ghir_D10G026930	GO:0000166
Ghir_A08G009960	GO:0000166
Ghir_A10G013130	GO:0000166
Ghir_D06G022420	GO:0000166
Ghir_A02G018640	GO:0000166
Ghir_D08G000700	GO:0000166
Ghir_D10G008800	GO:0000166
Ghir_D01G008090	GO:0000166
Ghir_A10G024460	GO:0000166
Ghir_A03G017340	GO:0000166
Ghir_A02G002070	GO:0000166
Ghir_A12G026540	GO:0000166
Ghir_A04G005940	GO:0000166
Ghir_D09G004320	GO:0000166
Ghir_D03G004930	GO:0000166
Ghir_A13G021860	GO:0000166
Ghir_D07G013220	GO:0000166
Ghir_A03G020960	GO:0000166
Ghir_D06G011440	GO:0000166
Ghir_A03G017210	GO:0000166
Ghir_D02G012550	GO:0000166
Ghir_D10G019480	GO:0000166
Ghir_A09G005780	GO:0000166
Ghir_D12G009890	GO:0000166
Ghir_A08G016230	GO:0000166
Ghir_D05G009030	GO:0000166
Ghir_D13G009600	GO:0000166
Ghir_A02G000100	GO:0000166
Ghir_D05G006560	GO:0000166
Ghir_A13G011530	GO:0000166
Ghir_A10G004580	GO:0000166
Ghir_D10G006590	GO:0000166
Ghir_D05G008530	GO:0000166
Ghir_A05G005950	GO:0000166
Ghir_D12G027680	GO:0000166
Ghir_A07G005080	GO:0000166
Ghir_A07G013040	GO:0000166
Ghir_A03G023910	GO:0000166
Ghir_D08G017070	GO:0000166
Ghir_A13G023720	GO:0000166
Ghir_D12G005310	GO:0000166
Ghir_D06G020770	GO:0000166
Ghir_A07G020440	GO:0000166
Ghir_A03G004570	GO:0000166
Ghir_A05G009500	GO:0000166
Ghir_A01G009620	GO:0000166
Ghir_A13G011590	GO:0000166
Ghir_D11G020590	GO:0000166
Ghir_D11G005120	GO:0000166
Ghir_D01G019040	GO:0000166
Ghir_A03G005760	GO:0000166
Ghir_D06G016130	GO:0000166
Ghir_A01G013360	GO:0000166
Ghir_D10G015730	GO:0000166
Ghir_A07G023280	GO:0000166
Ghir_A06G020590	GO:0000166
Ghir_D10G021860	GO:0000166
Ghir_A02G003550	GO:0000166
Ghir_A05G034890	GO:0000166
Ghir_D06G022200	GO:0000166
Ghir_D12G000400	GO:0000166
Ghir_D06G011770	GO:0000166
Ghir_D11G031910	GO:0000166
Ghir_A05G012550	GO:0000166
Ghir_D05G016790	GO:0000166
Ghir_A12G019110	GO:0000166
Ghir_A10G012910	GO:0000166
Ghir_A04G009230	GO:0000166
Ghir_A11G006950	GO:0000166
Ghir_D08G024630	GO:0000166
Ghir_A05G008540	GO:0000166
Ghir_D06G001970	GO:0000166
Ghir_A09G011010	GO:0000166
Ghir_D05G028270	GO:0000166
Ghir_D11G003110	GO:0000166
Ghir_A01G003270	GO:0000166
Ghir_A13G003560	GO:0000166
Ghir_A03G015220	GO:0000166
Ghir_D10G010380	GO:0000166
Ghir_A05G042230	GO:0000166
Ghir_A01G019870	GO:0000166
Ghir_A07G013920	GO:0000166
Ghir_D07G014460	GO:0000166
Ghir_D11G030390	GO:0000166
Ghir_D03G016210	GO:0000166
Ghir_D03G008420	GO:0000166
Ghir_A06G001990	GO:0000166
Ghir_A05G039870	GO:0000166
Ghir_A08G024600	GO:0000166
Ghir_A11G023570	GO:0000166
Ghir_D11G031890	GO:0000166
Ghir_D11G016020	GO:0000166
Ghir_D13G004210	GO:0000166
Ghir_D09G013360	GO:0000166
Ghir_A11G001640	GO:0000166
Ghir_A13G006780	GO:0000166
Ghir_D10G000710	GO:0000166
Ghir_D11G005230	GO:0000166
Ghir_A07G011040	GO:0000166
Ghir_D11G010790	GO:0000166
Ghir_A06G021350	GO:0000166
Ghir_A01G015110	GO:0000166
Ghir_A07G010450	GO:0000166
Ghir_D02G023270	GO:0000166
Ghir_D06G021010	GO:0000166
Ghir_D03G003510	GO:0000166
Ghir_D05G037000	GO:0000166
Ghir_A06G021140	GO:0000166
Ghir_D13G017870	GO:0000166
Ghir_D09G020950	GO:0000166
Ghir_A11G019200	GO:0000166
Ghir_D02G013870	GO:0000166
Ghir_A10G004640	GO:0000166
Ghir_A08G003980	GO:0000166
Ghir_A11G011000	GO:0000166
Ghir_A08G002570	GO:0000166
Ghir_D08G027600	GO:0000166
Ghir_D06G009350	GO:0000166
Ghir_D04G004880	GO:0000166
Ghir_A07G024720	GO:0000166
Ghir_A08G001720	GO:0000166
Ghir_A09G010000	GO:0000166
Ghir_A01G020300	GO:0000166
Ghir_D05G025670	GO:0000166
Ghir_D10G021560	GO:0000166
Ghir_A11G027640	GO:0000166
Ghir_A07G014210	GO:0000166
Ghir_A06G003750	GO:0000166
Ghir_A10G013920	GO:0000166
Ghir_A06G020310	GO:0000166
Ghir_D11G017900	GO:0000166
Ghir_A12G027390	GO:0000166
Ghir_D10G024780	GO:0000166
Ghir_D05G002560	GO:0000166
Ghir_D11G010930	GO:0000166
Ghir_D02G020490	GO:0000166
Ghir_D03G005250	GO:0000166
Ghir_A08G000700	GO:0000166
Ghir_D01G021490	GO:0000166
Ghir_A12G016990	GO:0000166
Ghir_D10G023590	GO:0000166
Ghir_A09G015060	GO:0000166
Ghir_A05G002420	GO:0000166
Ghir_D09G018960	GO:0000166
Ghir_A10G005620	GO:0000166
Ghir_D12G014140	GO:0000166
Ghir_D03G010680	GO:0000166
Ghir_D05G014590	GO:0000166
Ghir_D11G021660	GO:0000166
Ghir_D09G013720	GO:0000166
Ghir_A05G026690	GO:0000166
Ghir_D06G021290	GO:0000166
Ghir_D05G002820	GO:0000166
Ghir_A05G026530	GO:0000166
Ghir_D09G025560	GO:0000166
Ghir_D08G010500	GO:0000166
Ghir_A09G010760	GO:0000166
Ghir_D01G016580	GO:0000166
Ghir_D07G008460	GO:0000166
Ghir_A01G001870	GO:0000166
Ghir_D01G004320	GO:0000166
Ghir_D10G000350	GO:0000166
Ghir_A09G013320	GO:0000166
Ghir_A04G004930	GO:0000166
Ghir_D10G006630	GO:0000166
Ghir_D04G013150	GO:0000166
Ghir_A13G023790	GO:0000166
Ghir_A05G023670	GO:0000166
Ghir_A12G017200	GO:0000166
Ghir_D13G010410	GO:0000166
Ghir_A11G010800	GO:0000166
Ghir_D02G011000	GO:0000166
Ghir_A11G025280	GO:0000166
Ghir_D07G021430	GO:0000166
Ghir_D13G017210	GO:0000166
Ghir_A11G017000	GO:0000166
Ghir_D12G021960	GO:0000166
Ghir_D13G024850	GO:0000166
Ghir_A12G016830	GO:0000166
Ghir_D05G004490	GO:0000166
Ghir_D08G008130	GO:0000166
Ghir_D01G009740	GO:0000166
Ghir_D09G020660	GO:0000166
Ghir_D04G002770	GO:0000166
Ghir_A09G008210	GO:0000166
Ghir_D08G001420	GO:0000166
Ghir_A13G003550	GO:0000166
Ghir_D12G014820	GO:0000166
Ghir_A01G007030	GO:0000166
Ghir_A11G019130	GO:0000166
Ghir_D13G014900	GO:0000166
Ghir_A08G024090	GO:0000166
Ghir_D09G017400	GO:0000166
Ghir_D08G004180	GO:0000166
Ghir_D09G004050	GO:0000166
Ghir_A07G007270	GO:0000166
Ghir_A09G011930	GO:0000166
Ghir_D02G022950	GO:0000166
Ghir_D11G006920	GO:0000166
Ghir_D12G027530	GO:0000166
Ghir_D01G004020	GO:0000166
Ghir_D11G001900	GO:0000166
Ghir_D12G005940	GO:0000166
Ghir_D05G010950	GO:0000166
Ghir_A08G021920	GO:0000166
Ghir_A06G009780	GO:0000166
Ghir_D05G035460	GO:0000166
Ghir_D04G009580	GO:0000166
Ghir_D09G018670	GO:0000166
Ghir_D05G008370	GO:0000166
Ghir_D11G016010	GO:0000166
Ghir_D08G024930	GO:0000166
Ghir_D09G000890	GO:0000166
Ghir_A05G000300	GO:0000166
Ghir_A08G005460	GO:0000166
Ghir_D06G021160	GO:0000166
Ghir_A05G024460	GO:0000166
Ghir_D06G007250	GO:0000166
Ghir_D04G017920	GO:0000166
Ghir_A13G009510	GO:0000166
Ghir_D06G001800	GO:0000166
Ghir_A01G010850	GO:0000166
Ghir_D11G033430	GO:0000166
Ghir_D13G002860	GO:0000166
Ghir_A08G000360	GO:0000166
Ghir_A10G020540	GO:0000166
Ghir_A12G014020	GO:0000166
Ghir_D06G001400	GO:0000166
Ghir_A12G009080	GO:0000166
Ghir_D02G013350	GO:0000166
Ghir_A05G030970	GO:0000166
Ghir_A02G015190	GO:0000166
Ghir_A11G023380	GO:0000166
Ghir_A08G014240	GO:0000166
Ghir_A03G002410	GO:0000166
Ghir_A13G001430	GO:0000166
Ghir_A06G016710	GO:0000166
Ghir_A13G016080	GO:0000166
Ghir_D02G018170	GO:0000166
Ghir_D08G027920	GO:0000166
Ghir_A05G026480	GO:0000166
Ghir_A12G009420	GO:0000166
Ghir_A09G000980	GO:0000166
Ghir_D07G009600	GO:0000166
Ghir_D06G017660	GO:0000166
Ghir_D06G018760	GO:0000166
Ghir_A08G004860	GO:0000166
Ghir_A08G016330	GO:0000166
Ghir_D10G025220	GO:0000166
Ghir_D09G006740	GO:0000166
Ghir_A13G014040	GO:0000166
Ghir_A10G003790	GO:0000166
Ghir_D06G022980	GO:0000166
Ghir_A05G017000	GO:0000166
Ghir_A11G031640	GO:0000166
Ghir_D11G017710	GO:0000166
Ghir_D02G012970	GO:0000166
Ghir_D11G005480	GO:0000166
Ghir_A10G019860	GO:0000166
Ghir_D01G012000	GO:0000166
Ghir_D13G024690	GO:0000166
Ghir_A07G012820	GO:0000166
Ghir_D07G014170	GO:0000166
Ghir_D04G013370	GO:0000166
Ghir_A13G004850	GO:0000166
Ghir_D11G022000	GO:0000166
Ghir_D06G000380	GO:0000166
Ghir_A13G012410	GO:0000166
Ghir_A11G005530	GO:0000166
Ghir_D05G016800	GO:0000166
Ghir_A05G039880	GO:0000166
Ghir_D11G010740	GO:0000166
Ghir_D05G026520	GO:0000166
Ghir_D05G023590	GO:0000166
Ghir_D11G026240	GO:0000166
Ghir_D10G001070	GO:0000166
Ghir_D13G016110	GO:0000166
Ghir_A07G020450	GO:0000166
Ghir_D01G014970	GO:0000166
Ghir_D11G025280	GO:0000166
Ghir_A04G002620	GO:0000166
Ghir_D08G026300	GO:0000166
Ghir_A01G013290	GO:0000166
Ghir_D11G020490	GO:0000166
Ghir_D03G016960	GO:0000166
Ghir_A02G015270	GO:0000166
Ghir_D10G011750	GO:0000166
Ghir_A01G013130	GO:0000166
Ghir_D08G000770	GO:0000166
Ghir_D04G013930	GO:0000166
Ghir_A10G022430	GO:0000166
Ghir_A09G006280	GO:0000166
Ghir_D07G004860	GO:0000166
Ghir_A09G009550	GO:0000166
Ghir_A11G015880	GO:0000166
Ghir_D02G008300	GO:0000166
Ghir_D09G025240	GO:0000166
Ghir_D05G034290	GO:0000166
Ghir_D04G018550	GO:0000166
Ghir_A13G016520	GO:0000166
Ghir_A10G012900	GO:0000166
Ghir_A01G022940	GO:0000166
Ghir_A07G000530	GO:0000166
Ghir_D02G002350	GO:0000166
Ghir_D08G001320	GO:0000166
Ghir_A13G000760	GO:0000166
Ghir_D09G009830	GO:0000166
Ghir_D10G017810	GO:0000166
Ghir_D03G003250	GO:0000166
Ghir_D03G018670	GO:0000166
Ghir_D06G012450	GO:0000166
Ghir_D05G000100	GO:0000166
Ghir_D11G014630	GO:0000166
Ghir_A05G033510	GO:0000166
Ghir_A08G002710	GO:0000166
Ghir_A05G020680	GO:0000166
Ghir_A11G015530	GO:0000166
Ghir_D10G003050	GO:0000166
Ghir_A02G016030	GO:0000166
Ghir_A02G017000	GO:0000166
Ghir_D09G011540	GO:0000166
Ghir_A12G020010	GO:0000166
Ghir_A13G014030	GO:0000166
Ghir_D02G025090	GO:0000166
Ghir_A08G000410	GO:0000166
Ghir_A11G020480	GO:0000166
Ghir_A03G019150	GO:0000166
Ghir_A01G014390	GO:0000166
Ghir_D08G021990	GO:0000166
Ghir_D11G022210	GO:0000166
Ghir_A09G022990	GO:0000166
Ghir_D04G006860	GO:0000166
Ghir_D06G020720	GO:0000166
Ghir_D03G000070	GO:0000166
Ghir_D03G003270	GO:0000166
Ghir_D03G003980	GO:0000166
Ghir_A03G001020	GO:0000166
Ghir_D03G000990	GO:0000166
Ghir_A03G000500	GO:0000166
Ghir_A12G007320	GO:0000166
Ghir_D10G000670	GO:0000166
Ghir_A11G022120	GO:0000166
Ghir_D05G010450	GO:0000166
Ghir_A01G005390	GO:0000166
Ghir_A02G016630	GO:0000166
Ghir_A12G004690	GO:0000166
Ghir_D08G020690	GO:0000166
Ghir_D04G012220	GO:0000166
Ghir_A11G010850	GO:0000166
Ghir_A13G001690	GO:0000166
Ghir_D10G005780	GO:0000166
Ghir_A06G019990	GO:0000166
Ghir_D09G003130	GO:0000166
Ghir_A12G027500	GO:0000166
Ghir_A10G005340	GO:0000166
Ghir_A03G003810	GO:0000166
Ghir_D11G004350	GO:0000166
Ghir_D11G020040	GO:0000166
Ghir_D03G012150	GO:0000166
Ghir_D13G011630	GO:0000166
Ghir_A02G016710	GO:0000166
Ghir_A03G017220	GO:0000166
Ghir_D10G007520	GO:0000166
Ghir_A11G022160	GO:0000166
Ghir_A01G006000	GO:0000166
Ghir_D03G002630	GO:0000166
Ghir_D12G012490	GO:0000166
Ghir_D06G014980	GO:0000166
Ghir_D02G004730	GO:0000166
Ghir_A08G023710	GO:0000166
Ghir_D03G004300	GO:0000166
Ghir_D06G011390	GO:0000166
Ghir_D06G012540	GO:0000166
Ghir_A05G011250	GO:0000166
Ghir_A01G015500	GO:0000166
Ghir_A12G026430	GO:0000166
Ghir_D13G012180	GO:0000166
Ghir_D11G034300	GO:0000166
Ghir_D01G016470	GO:0000166
Ghir_A02G014310	GO:0000166
Ghir_D10G022340	GO:0000166
Ghir_A09G023620	GO:0000166
Ghir_A11G015110	GO:0000166
Ghir_A13G003730	GO:0000166
Ghir_A11G020530	GO:0000166
Ghir_A07G011400	GO:0000166
Ghir_D08G005580	GO:0000166
Ghir_A11G001180	GO:0000166
Ghir_D09G001920	GO:0000166
Ghir_D10G006710	GO:0000166
Ghir_A13G022210	GO:0000166
Ghir_D11G001630	GO:0000166
Ghir_D11G010330	GO:0000166
Ghir_A06G022320	GO:0000166
Ghir_D04G015430	GO:0000166
Ghir_D02G018490	GO:0000166
Ghir_D09G002850	GO:0000166
Ghir_D08G016500	GO:0000166
Ghir_D11G022760	GO:0000166
Ghir_A12G000420	GO:0000166
Ghir_A07G004840	GO:0000166
Ghir_A05G028260	GO:0000166
Ghir_A10G010020	GO:0000166
Ghir_D01G001870	GO:0000166
Ghir_D05G002590	GO:0000166
Ghir_A12G017090	GO:0000166
Ghir_D06G015090	GO:0000166
Ghir_D07G010490	GO:0000166
Ghir_D02G007030	GO:0000166
Ghir_A13G024070	GO:0000166
Ghir_D11G031870	GO:0000166
Ghir_A03G009670	GO:0000166
Ghir_D01G011610	GO:0000166
Ghir_A11G005180	GO:0000166
Ghir_D11G003770	GO:0000166
Ghir_A08G003440	GO:0000166
Ghir_D01G015170	GO:0000166
Ghir_A04G007760	GO:0000166
Ghir_D08G001810	GO:0000166
Ghir_D01G019510	GO:0000166
Ghir_A03G003250	GO:0000166
Ghir_A05G020230	GO:0000166
Ghir_D01G018990	GO:0000166
Ghir_D09G008010	GO:0000166
Ghir_A11G003820	GO:0000166
Ghir_D11G026970	GO:0000166
Ghir_A06G001530	GO:0000166
Ghir_A13G000640	GO:0000166
Ghir_A06G000530	GO:0000166
Ghir_A05G017960	GO:0000166
Ghir_D08G002200	GO:0000166
Ghir_A03G000430	GO:0000166
Ghir_A08G006760	GO:0000166
Ghir_A04G008280	GO:0000166
Ghir_A10G014870	GO:0000166
Ghir_A05G006520	GO:0000166
Ghir_A01G015140	GO:0000166
Ghir_D02G010590	GO:0000166
Ghir_D05G009740	GO:0000166
Ghir_A04G015690	GO:0000166
Ghir_D13G016790	GO:0000166
Ghir_D12G000800	GO:0000166
Ghir_D08G016330	GO:0000166
Ghir_D08G020900	GO:0000166
Ghir_D10G014340	GO:0000166
Ghir_D07G006160	GO:0000166
Ghir_A12G024500	GO:0000166
Ghir_A02G006560	GO:0000166
Ghir_A05G039310	GO:0000166
Ghir_A04G012620	GO:0000166
Ghir_A10G014720	GO:0000166
Ghir_A11G022170	GO:0000166
Ghir_A07G014360	GO:0000166
Ghir_A04G005010	GO:0000166
Ghir_D03G013660	GO:0000166
Ghir_D07G003640	GO:0000166
Ghir_A13G003150	GO:0000166
Ghir_D07G023390	GO:0000166
Ghir_D02G020630	GO:0000166
Ghir_A03G005400	GO:0000166
Ghir_D01G001800	GO:0000166
Ghir_D05G012280	GO:0000166
Ghir_A13G000240	GO:0000166
Ghir_D09G022850	GO:0000166
Ghir_A03G007170	GO:0000166
Ghir_D05G015710	GO:0000166
Ghir_A08G026490	GO:0000166
[truncated: 175,191 more rows]

## Sheet: KEGG_background file
Ghir_D01G016210	K02703	photosystem II P680 reaction center D1 protein [EC:1.10.3.9]
Ghir_D03G008220	K02703	photosystem II P680 reaction center D1 protein [EC:1.10.3.9]
Ghir_D03G008360	K02703	photosystem II P680 reaction center D1 protein [EC:1.10.3.9]
Ghir_D03G008370	K02703	photosystem II P680 reaction center D1 protein [EC:1.10.3.9]
Ghir_D04G017330	K02703	photosystem II P680 reaction center D1 protein [EC:1.10.3.9]
Ghir_D07G019940	K02703	photosystem II P680 reaction center D1 protein [EC:1.10.3.9]
Ghir_A04G004030	K02703	photosystem II P680 reaction center D1 protein [EC:1.10.3.9]
Ghir_A08G010750	K02703	photosystem II P680 reaction center D1 protein [EC:1.10.3.9]
Ghir_Scaffold3054G000010	K02703	photosystem II P680 reaction center D1 protein [EC:1.10.3.9]
Ghir_A12G013100	K02706	photosystem II P680 reaction center D2 protein [EC:1.10.3.9]
Ghir_D05G031560	K02706	photosystem II P680 reaction center D2 protein [EC:1.10.3.9]
Ghir_D08G012250	K02706	photosystem II P680 reaction center D2 protein [EC:1.10.3.9]
Ghir_D08G012360	K02706	photosystem II P680 reaction center D2 protein [EC:1.10.3.9]
Ghir_A01G015510	K02705	photosystem II CP43 chlorophyll apoprotein
Ghir_D03G008140	K02705	photosystem II CP43 chlorophyll apoprotein
Ghir_D05G023970	K02705	photosystem II CP43 chlorophyll apoprotein
Ghir_D08G012240	K02705	photosystem II CP43 chlorophyll apoprotein
Ghir_D08G012280	K02705	photosystem II CP43 chlorophyll apoprotein
Ghir_D08G012290	K02705	photosystem II CP43 chlorophyll apoprotein
Ghir_A09G004600	K02705	photosystem II CP43 chlorophyll apoprotein
Ghir_D06G023790	K02705	photosystem II CP43 chlorophyll apoprotein
Ghir_A01G013140	K02704	photosystem II CP47 chlorophyll apoprotein
Ghir_A11G024970	K02704	photosystem II CP47 chlorophyll apoprotein
Ghir_A12G013450	K02704	photosystem II CP47 chlorophyll apoprotein
Ghir_A12G024200	K02704	photosystem II CP47 chlorophyll apoprotein
Ghir_A13G022020	K02704	photosystem II CP47 chlorophyll apoprotein
Ghir_D02G009900	K02704	photosystem II CP47 chlorophyll apoprotein
Ghir_D03G008380	K02704	photosystem II CP47 chlorophyll apoprotein
Ghir_D03G008390	K02704	photosystem II CP47 chlorophyll apoprotein
Ghir_D06G012310	K02704	photosystem II CP47 chlorophyll apoprotein
Ghir_D08G012400	K02704	photosystem II CP47 chlorophyll apoprotein
Ghir_A09G005210	K02704	photosystem II CP47 chlorophyll apoprotein
Ghir_A09G010980	K02704	photosystem II CP47 chlorophyll apoprotein
Ghir_A09G020800	K02704	photosystem II CP47 chlorophyll apoprotein
Ghir_Scaffold791G000070	K02704	photosystem II CP47 chlorophyll apoprotein
Ghir_D04G010480	K02707	photosystem II cytochrome b559 subunit alpha
Ghir_D08G009430	K02707	photosystem II cytochrome b559 subunit alpha
Ghir_A01G013090	K02712	photosystem II PsbK protein
Ghir_D03G005430	K02712	photosystem II PsbK protein
Ghir_D03G008180	K02712	photosystem II PsbK protein
Ghir_D03G008230	K02712	photosystem II PsbK protein
Ghir_D04G010490	K02712	photosystem II PsbK protein
Ghir_D05G030990	K02712	photosystem II PsbK protein
Ghir_A04G004050	K02712	photosystem II PsbK protein
Ghir_A05G039470	K02712	photosystem II PsbK protein
Ghir_A07G009390	K02712	photosystem II PsbK protein
Ghir_A09G011020	K02712	photosystem II PsbK protein
Ghir_D01G003700	K02714	photosystem II PsbM protein
Ghir_D08G012270	K02714	photosystem II PsbM protein
Ghir_A05G008810	K02714	photosystem II PsbM protein
Ghir_A06G012740	K02714	photosystem II PsbM protein
Ghir_A06G014560	K02714	photosystem II PsbM protein
Ghir_A01G015030	K02723	photosystem II PsbY protein
Ghir_D01G016880	K02723	photosystem II PsbY protein
Ghir_A01G001730	K08902	photosystem II Psb27 protein
Ghir_A12G014840	K08902	photosystem II Psb27 protein
Ghir_D01G001710	K08902	photosystem II Psb27 protein
Ghir_D12G015000	K08902	photosystem II Psb27 protein
Ghir_D07G016580	K08903	photosystem II 13kDa protein
Ghir_A07G016270	K08903	photosystem II 13kDa protein
Ghir_A11G019900	K02716	photosystem II oxygen-evolving enhancer protein 1
Ghir_D11G019970	K02716	photosystem II oxygen-evolving enhancer protein 1
Ghir_A10G009190	K02716	photosystem II oxygen-evolving enhancer protein 1
Ghir_D04G003790	K02717	photosystem II oxygen-evolving enhancer protein 2
Ghir_D04G006550	K02717	photosystem II oxygen-evolving enhancer protein 2
Ghir_D05G030680	K02717	photosystem II oxygen-evolving enhancer protein 2
Ghir_D05G030680	K02717	photosystem II oxygen-evolving enhancer protein 2
Ghir_D10G012120	K02717	photosystem II oxygen-evolving enhancer protein 2
Ghir_A05G030750	K02717	photosystem II oxygen-evolving enhancer protein 2
Ghir_A05G036510	K02717	photosystem II oxygen-evolving enhancer protein 2
Ghir_A05G039300	K02717	photosystem II oxygen-evolving enhancer protein 2
Ghir_A10G015420	K02717	photosystem II oxygen-evolving enhancer protein 2
Ghir_A13G007670	K08901	photosystem II oxygen-evolving enhancer protein 3
Ghir_A13G007670	K08901	photosystem II oxygen-evolving enhancer protein 3
Ghir_A13G014830	K08901	photosystem II oxygen-evolving enhancer protein 3
Ghir_D05G017140	K08901	photosystem II oxygen-evolving enhancer protein 3
Ghir_D06G013530	K08901	photosystem II oxygen-evolving enhancer protein 3
Ghir_D10G002030	K08901	photosystem II oxygen-evolving enhancer protein 3
Ghir_D13G007910	K08901	photosystem II oxygen-evolving enhancer protein 3
Ghir_D13G015520	K08901	photosystem II oxygen-evolving enhancer protein 3
Ghir_A05G017330	K08901	photosystem II oxygen-evolving enhancer protein 3
Ghir_A06G012950	K08901	photosystem II oxygen-evolving enhancer protein 3
Ghir_A10G001230	K08901	photosystem II oxygen-evolving enhancer protein 3
Ghir_D05G033990	K03541	photosystem II 10kDa protein
Ghir_A04G005210	K03541	photosystem II 10kDa protein
Ghir_A01G018230	K03542	photosystem II 22kDa protein
Ghir_D01G019870	K03542	photosystem II 22kDa protein
Ghir_D05G023860	K03542	photosystem II 22kDa protein
Ghir_A05G024010	K03542	photosystem II 22kDa protein
Ghir_A11G013510	K02721	photosystem II PsbW protein
Ghir_A11G026980	K02721	photosystem II PsbW protein
Ghir_D07G022660	K02721	photosystem II PsbW protein
Ghir_D08G020620	K02721	photosystem II PsbW protein
Ghir_D11G013540	K02721	photosystem II PsbW protein
Ghir_A07G022570	K02721	photosystem II PsbW protein
Ghir_A08G019730	K02721	photosystem II PsbW protein
Ghir_A06G012890	K02689	photosystem I P700 chlorophyll a apoprotein A1
Ghir_D06G014430	K02691	photosystem I subunit VII
Ghir_A05G033090	K02691	photosystem I subunit VII
Ghir_A09G005480	K02691	photosystem I subunit VII
Ghir_A10G009480	K02691	photosystem I subunit VII
Ghir_A02G003190	K02692	photosystem I subunit II
Ghir_A12G000450	K02692	photosystem I subunit II
Ghir_D02G003560	K02692	photosystem I subunit II
Ghir_D08G007220	K02692	photosystem I subunit II
Ghir_D12G000430	K02692	photosystem I subunit II
Ghir_A08G007170	K02692	photosystem I subunit II
Ghir_A11G014360	K02693	photosystem I subunit IV
Ghir_D07G021960	K02693	photosystem I subunit IV
Ghir_D08G005270	K02693	photosystem I subunit IV
Ghir_D11G014410	K02693	photosystem I subunit IV
Ghir_A07G021870	K02693	photosystem I subunit IV
Ghir_A08G005150	K02693	photosystem I subunit IV
Ghir_D05G014600	K02694	photosystem I subunit III
Ghir_D06G015970	K02694	photosystem I subunit III
Ghir_A05G014780	K02694	photosystem I subunit III
Ghir_A06G015110	K02694	photosystem I subunit III
Ghir_A06G015110	K02694	photosystem I subunit III
Ghir_D05G012480	K02697	photosystem I subunit IX
Ghir_D09G004950	K02697	photosystem I subunit IX
Ghir_D09G010410	K02697	photosystem I subunit IX
Ghir_D02G024880	K02698	photosystem I subunit X
Ghir_A03G023470	K02698	photosystem I subunit X
Ghir_D07G009830	K02699	photosystem I subunit XI
Ghir_D07G017690	K02699	photosystem I subunit XI
Ghir_A07G009770	K02699	photosystem I subunit XI
Ghir_A07G017220	K02699	photosystem I subunit XI
Ghir_A07G017220	K02699	photosystem I subunit XI
Ghir_A13G013380	K08905	photosystem I subunit V
Ghir_D05G039370	K08905	photosystem I subunit V
Ghir_D13G014100	K08905	photosystem I subunit V
Ghir_A04G000200	K08905	photosystem I subunit V
Ghir_D05G013100	K02695	photosystem I subunit VI
Ghir_A05G013330	K02695	photosystem I subunit VI
Ghir_A11G023960	K02701	photosystem I subunit PsaN
Ghir_D04G003410	K02701	photosystem I subunit PsaN
Ghir_D11G024330	K02701	photosystem I subunit PsaN
Ghir_A05G039690	K02701	photosystem I subunit PsaN
Ghir_D05G008250	K14332	photosystem I subunit PsaO
Ghir_D07G011920	K14332	photosystem I subunit PsaO
Ghir_A05G008230	K14332	photosystem I subunit PsaO
Ghir_A07G011880	K14332	photosystem I subunit PsaO
Ghir_A13G002210	K08907	light-harvesting complex I chlorophyll a/b binding protein 1
Ghir_D05G008920	K08907	light-harvesting complex I chlorophyll a/b binding protein 1
Ghir_D13G002490	K08907	light-harvesting complex I chlorophyll a/b binding protein 1
Ghir_A05G008940	K08907	light-harvesting complex I chlorophyll a/b binding protein 1
Ghir_A01G015560	K08908	light-harvesting complex I chlorophyll a/b binding protein 2
Ghir_A12G016040	K08908	light-harvesting complex I chlorophyll a/b binding protein 2
Ghir_A13G014960	K08908	light-harvesting complex I chlorophyll a/b binding protein 2
Ghir_D01G016230	K08908	light-harvesting complex I chlorophyll a/b binding protein 2
Ghir_D05G027830	K08908	light-harvesting complex I chlorophyll a/b binding protein 2
Ghir_D07G001690	K08908	light-harvesting complex I chlorophyll a/b binding protein 2
Ghir_D12G016270	K08908	light-harvesting complex I chlorophyll a/b binding protein 2
Ghir_A07G001660	K08908	light-harvesting complex I chlorophyll a/b binding protein 2
Ghir_A11G015580	K08909	light-harvesting complex I chlorophyll a/b binding protein 3
Ghir_A11G027060	K08909	light-harvesting complex I chlorophyll a/b binding protein 3
Ghir_A13G015660	K08909	light-harvesting complex I chlorophyll a/b binding protein 3
Ghir_D11G015600	K08909	light-harvesting complex I chlorophyll a/b binding protein 3
Ghir_A12G018910	K08910	light-harvesting complex I chlorophyll a/b binding protein 4
Ghir_D07G007230	K08910	light-harvesting complex I chlorophyll a/b binding protein 4
Ghir_D12G019120	K08910	light-harvesting complex I chlorophyll a/b binding protein 4
Ghir_A07G007230	K08910	light-harvesting complex I chlorophyll a/b binding protein 4
Ghir_A01G010720	K08911	light-harvesting complex I chlorophyll a/b binding protein 5
Ghir_D01G011750	K08911	light-harvesting complex I chlorophyll a/b binding protein 5
Ghir_D05G015270	K08912	light-harvesting complex II chlorophyll a/b binding protein 1
Ghir_D06G015420	K08912	light-harvesting complex II chlorophyll a/b binding protein 1
Ghir_D06G015430	K08912	light-harvesting complex II chlorophyll a/b binding protein 1
Ghir_D10G004420	K08912	light-harvesting complex II chlorophyll a/b binding protein 1
Ghir_A05G015460	K08912	light-harvesting complex II chlorophyll a/b binding protein 1
Ghir_A06G021200	K08912	light-harvesting complex II chlorophyll a/b binding protein 1
Ghir_A10G003620	K08912	light-harvesting complex II chlorophyll a/b binding protein 1
Ghir_D07G018040	K08913	light-harvesting complex II chlorophyll a/b binding protein 2
Ghir_D07G018080	K08913	light-harvesting complex II chlorophyll a/b binding protein 2
Ghir_D07G020650	K08913	light-harvesting complex II chlorophyll a/b binding protein 2
Ghir_A07G017820	K08913	light-harvesting complex II chlorophyll a/b binding protein 2
Ghir_A07G017820	K08913	light-harvesting complex II chlorophyll a/b binding protein 2
Ghir_A07G018550	K08913	light-harvesting complex II chlorophyll a/b binding protein 2
Ghir_A07G020540	K08913	light-harvesting complex II chlorophyll a/b binding protein 2
Ghir_A01G006010	K08914	light-harvesting complex II chlorophyll a/b binding protein 3
Ghir_D01G006310	K08914	light-harvesting complex II chlorophyll a/b binding protein 3
Ghir_D05G037010	K08914	light-harvesting complex II chlorophyll a/b binding protein 3
Ghir_A04G002610	K08914	light-harvesting complex II chlorophyll a/b binding protein 3
Ghir_A04G002640	K08914	light-harvesting complex II chlorophyll a/b binding protein 3
Ghir_A01G022190	K08915	light-harvesting complex II chlorophyll a/b binding protein 4
Ghir_D01G023730	K08915	light-harvesting complex II chlorophyll a/b binding protein 4
Ghir_D06G018510	K08915	light-harvesting complex II chlorophyll a/b binding protein 4
Ghir_D10G026370	K08915	light-harvesting complex II chlorophyll a/b binding protein 4
Ghir_A06G017630	K08915	light-harvesting complex II chlorophyll a/b binding protein 4
Ghir_A06G017630	K08915	light-harvesting complex II chlorophyll a/b binding protein 4
Ghir_A10G023870	K08915	light-harvesting complex II chlorophyll a/b binding protein 4
Ghir_Scaffold949G000020	K08915	light-harvesting complex II chlorophyll a/b binding protein 4
Ghir_D05G025270	K08916	light-harvesting complex II chlorophyll a/b binding protein 5
Ghir_A10G006670	K08916	light-harvesting complex II chlorophyll a/b binding protein 5
Ghir_D02G020390	K08917	light-harvesting complex II chlorophyll a/b binding protein 6
Ghir_D04G016630	K08917	light-harvesting complex II chlorophyll a/b binding protein 6
Ghir_A03G019040	K08917	light-harvesting complex II chlorophyll a/b binding protein 6
Ghir_A04G012220	K08917	light-harvesting complex II chlorophyll a/b binding protein 6
Ghir_A02G012340	K14172	light-harvesting complex II chlorophyll a/b binding protein 7
Ghir_D03G007620	K14172	light-harvesting complex II chlorophyll a/b binding protein 7
Ghir_D03G007620	K14172	light-harvesting complex II chlorophyll a/b binding protein 7
Ghir_D06G016650	K07409	cytochrome P450 family 1 subfamily A polypeptide 2 [EC:1.14.14.1]
Ghir_D10G001770	K07409	cytochrome P450 family 1 subfamily A polypeptide 2 [EC:1.14.14.1]
Ghir_A06G015880	K07409	cytochrome P450 family 1 subfamily A polypeptide 2 [EC:1.14.14.1]
Ghir_A10G000990	K07409	cytochrome P450 family 1 subfamily A polypeptide 2 [EC:1.14.14.1]
Ghir_D05G003560	K07425	long-chain fatty acid omega-monooxygenase [EC:1.14.14.80]
Ghir_A05G003430	K07425	long-chain fatty acid omega-monooxygenase [EC:1.14.14.80]
Ghir_A01G007910	K00512	steroid 17alpha-monooxygenase / 17alpha-hydroxyprogesterone deacetylase [EC:1.14.14.19 1.14.14.32]
Ghir_A01G007940	K00512	steroid 17alpha-monooxygenase / 17alpha-hydroxyprogesterone deacetylase [EC:1.14.14.19 1.14.14.32]
Ghir_A01G018880	K00512	steroid 17alpha-monooxygenase / 17alpha-hydroxyprogesterone deacetylase [EC:1.14.14.19 1.14.14.32]
Ghir_A02G008790	K00512	steroid 17alpha-monooxygenase / 17alpha-hydroxyprogesterone deacetylase [EC:1.14.14.19 1.14.14.32]
Ghir_A13G013980	K00512	steroid 17alpha-monooxygenase / 17alpha-hydroxyprogesterone deacetylase [EC:1.14.14.19 1.14.14.32]
Ghir_D01G008250	K00512	steroid 17alpha-monooxygenase / 17alpha-hydroxyprogesterone deacetylase [EC:1.14.14.19 1.14.14.32]
Ghir_D01G008290	K00512	steroid 17alpha-monooxygenase / 17alpha-hydroxyprogesterone deacetylase [EC:1.14.14.19 1.14.14.32]
Ghir_D01G008300	K00512	steroid 17alpha-monooxygenase / 17alpha-hydroxyprogesterone deacetylase [EC:1.14.14.19 1.14.14.32]
Ghir_D01G008320	K00512	steroid 17alpha-monooxygenase / 17alpha-hydroxyprogesterone deacetylase [EC:1.14.14.19 1.14.14.32]
Ghir_D01G020330	K00512	steroid 17alpha-monooxygenase / 17alpha-hydroxyprogesterone deacetylase [EC:1.14.14.19 1.14.14.32]
Ghir_D02G009120	K00512	steroid 17alpha-monooxygenase / 17alpha-hydroxyprogesterone deacetylase [EC:1.14.14.19 1.14.14.32]
Ghir_D03G017160	K00512	steroid 17alpha-monooxygenase / 17alpha-hydroxyprogesterone deacetylase [EC:1.14.14.19 1.14.14.32]
Ghir_D05G034310	K00512	steroid 17alpha-monooxygenase / 17alpha-hydroxyprogesterone deacetylase [EC:1.14.14.19 1.14.14.32]
Ghir_D05G034320	K00512	steroid 17alpha-monooxygenase / 17alpha-hydroxyprogesterone deacetylase [EC:1.14.14.19 1.14.14.32]
Ghir_D05G034360	K00512	steroid 17alpha-monooxygenase / 17alpha-hydroxyprogesterone deacetylase [EC:1.14.14.19 1.14.14.32]
Ghir_D05G034360	K00512	steroid 17alpha-monooxygenase / 17alpha-hydroxyprogesterone deacetylase [EC:1.14.14.19 1.14.14.32]
Ghir_D07G022310	K00512	steroid 17alpha-monooxygenase / 17alpha-hydroxyprogesterone deacetylase [EC:1.14.14.19 1.14.14.32]
Ghir_D13G014640	K00512	steroid 17alpha-monooxygenase / 17alpha-hydroxyprogesterone deacetylase [EC:1.14.14.19 1.14.14.32]
Ghir_D13G014660	K00512	steroid 17alpha-monooxygenase / 17alpha-hydroxyprogesterone deacetylase [EC:1.14.14.19 1.14.14.32]
Ghir_A04G004880	K00512	steroid 17alpha-monooxygenase / 17alpha-hydroxyprogesterone deacetylase [EC:1.14.14.19 1.14.14.32]
Ghir_A09G013450	K00512	steroid 17alpha-monooxygenase / 17alpha-hydroxyprogesterone deacetylase [EC:1.14.14.19 1.14.14.32]
Ghir_A09G013460	K00512	steroid 17alpha-monooxygenase / 17alpha-hydroxyprogesterone deacetylase [EC:1.14.14.19 1.14.14.32]
Ghir_A09G013480	K00512	steroid 17alpha-monooxygenase / 17alpha-hydroxyprogesterone deacetylase [EC:1.14.14.19 1.14.14.32]
Ghir_A11G000790	K14985	26-hydroxylase [EC:1.14.-.-]
Ghir_D05G037520	K14985	26-hydroxylase [EC:1.14.-.-]
Ghir_D10G023890	K14985	26-hydroxylase [EC:1.14.-.-]
Ghir_D11G000820	K14985	26-hydroxylase [EC:1.14.-.-]
Ghir_D12G027810	K14985	26-hydroxylase [EC:1.14.-.-]
Ghir_D12G027820	K14985	26-hydroxylase [EC:1.14.-.-]
Ghir_D12G027830	K14985	26-hydroxylase [EC:1.14.-.-]
Ghir_A04G001890	K14985	26-hydroxylase [EC:1.14.-.-]
Ghir_D03G016840	K07437	cytochrome P450 family 26 subfamily A
Ghir_A12G015140	K05917	sterol 14alpha-demethylase [EC:1.14.14.154]
Ghir_D02G018290	K05917	sterol 14alpha-demethylase [EC:1.14.14.154]
Ghir_A03G017030	K05917	sterol 14alpha-demethylase [EC:1.14.14.154]
Ghir_A03G017030	K05917	sterol 14alpha-demethylase [EC:1.14.14.154]
Ghir_D12G015360	K05917	sterol 14alpha-demethylase [EC:1.14.14.154]
Ghir_A11G019020	K20617	cytochrome P450 family 71 subfamily A
Ghir_D03G011240	K20617	cytochrome P450 family 71 subfamily A
Ghir_D07G006170	K20617	cytochrome P450 family 71 subfamily A
Ghir_A03G008760	K20617	cytochrome P450 family 71 subfamily A
Ghir_D10G026470	K20617	cytochrome P450 family 71 subfamily A
Ghir_D11G022880	K20617	cytochrome P450 family 71 subfamily A
Ghir_A05G019180	K20617	cytochrome P450 family 71 subfamily A
Ghir_A07G006170	K20617	cytochrome P450 family 71 subfamily A
Ghir_A10G019740	K20617	cytochrome P450 family 71 subfamily A
Ghir_A10G019780	K20617	cytochrome P450 family 71 subfamily A
Ghir_A10G024050	K20617	cytochrome P450 family 71 subfamily A
Ghir_A11G024410	K00487	trans-cinnamate 4-monooxygenase [EC:1.14.14.91]
Ghir_A13G024830	K00487	trans-cinnamate 4-monooxygenase [EC:1.14.14.91]
Ghir_D10G019720	K00487	trans-cinnamate 4-monooxygenase [EC:1.14.14.91]
Ghir_D11G024420	K00487	trans-cinnamate 4-monooxygenase [EC:1.14.14.91]
Ghir_D13G025600	K00487	trans-cinnamate 4-monooxygenase [EC:1.14.14.91]
Ghir_A10G018240	K00487	trans-cinnamate 4-monooxygenase [EC:1.14.14.91]
Ghir_A12G002990	K01723	hydroperoxide dehydratase [EC:4.2.1.92]
Ghir_A12G003000	K01723	hydroperoxide dehydratase [EC:4.2.1.92]
Ghir_A12G003010	K01723	hydroperoxide dehydratase [EC:4.2.1.92]
Ghir_D02G009520	K01723	hydroperoxide dehydratase [EC:4.2.1.92]
Ghir_D05G026510	K01723	hydroperoxide dehydratase [EC:4.2.1.92]
Ghir_D06G001100	K01723	hydroperoxide dehydratase [EC:4.2.1.92]
Ghir_D06G001110	K01723	hydroperoxide dehydratase [EC:4.2.1.92]
Ghir_D06G001120	K01723	hydroperoxide dehydratase [EC:4.2.1.92]
Ghir_D12G004270	K01723	hydroperoxide dehydratase [EC:4.2.1.92]
Ghir_D12G004290	K01723	hydroperoxide dehydratase [EC:4.2.1.92]
Ghir_A04G012550	K01723	hydroperoxide dehydratase [EC:4.2.1.92]
Ghir_A05G026470	K01723	hydroperoxide dehydratase [EC:4.2.1.92]
Ghir_A06G001250	K01723	hydroperoxide dehydratase [EC:4.2.1.92]
Ghir_A03G023770	K01723	hydroperoxide dehydratase [EC:4.2.1.92]
Ghir_A11G016370	K10528	hydroperoxide lyase [EC:4.1.2.-]
Ghir_D11G016430	K10528	hydroperoxide lyase [EC:4.1.2.-]
Ghir_A12G019280	K05280	flavonoid 3'-monooxygenase [EC:1.14.14.82]
Ghir_D12G019530	K05280	flavonoid 3'-monooxygenase [EC:1.14.14.82]
Ghir_D04G011470	K22983	cytochrome P450 family 76 subfamily A
Ghir_D04G011470	K22983	cytochrome P450 family 76 subfamily A
Ghir_D09G014600	K22983	cytochrome P450 family 76 subfamily A
Ghir_A04G007390	K22983	cytochrome P450 family 76 subfamily A
Ghir_A04G007410	K22983	cytochrome P450 family 76 subfamily A
Ghir_A09G014530	K22983	cytochrome P450 family 76 subfamily A
Ghir_A08G018360	K20556	cytochrome P450 family 76 subfamily C
Ghir_A09G020260	K20556	cytochrome P450 family 76 subfamily C
Ghir_A09G020280	K20556	cytochrome P450 family 76 subfamily C
Ghir_A12G009240	K21995	unsaturated fatty acid epoxidase [EC:1.14.-.-]
Ghir_D10G021850	K21995	unsaturated fatty acid epoxidase [EC:1.14.-.-]
Ghir_D12G009630	K21995	unsaturated fatty acid epoxidase [EC:1.14.-.-]
Ghir_A10G020150	K21995	unsaturated fatty acid epoxidase [EC:1.14.-.-]
Ghir_A02G014990	K20619	cytochrome P450 family 78 subfamily A
Ghir_A11G006560	K20619	cytochrome P450 family 78 subfamily A
Ghir_A12G017100	K20619	cytochrome P450 family 78 subfamily A
Ghir_A13G008030	K20619	cytochrome P450 family 78 subfamily A
Ghir_D02G013340	K20619	cytochrome P450 family 78 subfamily A
Ghir_D03G004680	K20619	cytochrome P450 family 78 subfamily A
Ghir_D06G012360	K20619	cytochrome P450 family 78 subfamily A
Ghir_A03G011870	K20619	cytochrome P450 family 78 subfamily A
Ghir_D12G017340	K20619	cytochrome P450 family 78 subfamily A
Ghir_D13G008720	K20619	cytochrome P450 family 78 subfamily A
Ghir_A06G012140	K20619	cytochrome P450 family 78 subfamily A
Ghir_D05G010970	K12153	phenylalanine N-monooxygenase [EC:1.14.14.40]
Ghir_D05G028450	K12153	phenylalanine N-monooxygenase [EC:1.14.14.40]
Ghir_D07G020840	K12153	phenylalanine N-monooxygenase [EC:1.14.14.40]
Ghir_D07G020850	K12153	phenylalanine N-monooxygenase [EC:1.14.14.40]
Ghir_D07G020860	K12153	phenylalanine N-monooxygenase [EC:1.14.14.40]
Ghir_D07G020880	K12153	phenylalanine N-monooxygenase [EC:1.14.14.40]
Ghir_D07G020890	K12153	phenylalanine N-monooxygenase [EC:1.14.14.40]
Ghir_D10G019920	K12153	phenylalanine N-monooxygenase [EC:1.14.14.40]
Ghir_D10G019930	K12153	phenylalanine N-monooxygenase [EC:1.14.14.40]
Ghir_A05G011230	K12153	phenylalanine N-monooxygenase [EC:1.14.14.40]
Ghir_A05G028440	K12153	phenylalanine N-monooxygenase [EC:1.14.14.40]
Ghir_A07G020720	K12153	phenylalanine N-monooxygenase [EC:1.14.14.40]
Ghir_A07G020740	K12153	phenylalanine N-monooxygenase [EC:1.14.14.40]
Ghir_A07G020750	K12153	phenylalanine N-monooxygenase [EC:1.14.14.40]
Ghir_A07G020760	K12153	phenylalanine N-monooxygenase [EC:1.14.14.40]
Ghir_A10G018420	K12153	phenylalanine N-monooxygenase [EC:1.14.14.40]
Ghir_A11G023310	K13260	isoflavone/4'-methoxyisoflavone 2'-hydroxylase [EC:1.14.14.90 1.14.14.89]
Ghir_A11G023320	K13260	isoflavone/4'-methoxyisoflavone 2'-hydroxylase [EC:1.14.14.90 1.14.14.89]
Ghir_A12G008000	K13260	isoflavone/4'-methoxyisoflavone 2'-hydroxylase [EC:1.14.14.90 1.14.14.89]
Ghir_D07G008690	K13260	isoflavone/4'-methoxyisoflavone 2'-hydroxylase [EC:1.14.14.90 1.14.14.89]
Ghir_D11G021050	K13260	isoflavone/4'-methoxyisoflavone 2'-hydroxylase [EC:1.14.14.90 1.14.14.89]
Ghir_D12G009210	K13260	isoflavone/4'-methoxyisoflavone 2'-hydroxylase [EC:1.14.14.90 1.14.14.89]
Ghir_A07G008610	K13260	isoflavone/4'-methoxyisoflavone 2'-hydroxylase [EC:1.14.14.90 1.14.14.89]
Ghir_D07G010090	K17961	trimethyltridecatetraene/dimethylnonatriene synthase [EC:1.14.14.58 1.14.14.59]
Ghir_D07G010100	K17961	trimethyltridecatetraene/dimethylnonatriene synthase [EC:1.14.14.58 1.14.14.59]
Ghir_D07G010110	K17961	trimethyltridecatetraene/dimethylnonatriene synthase [EC:1.14.14.58 1.14.14.59]
Ghir_A07G010060	K17961	trimethyltridecatetraene/dimethylnonatriene synthase [EC:1.14.14.58 1.14.14.59]
Ghir_A07G010070	K17961	trimethyltridecatetraene/dimethylnonatriene synthase [EC:1.14.14.58 1.14.14.59]
Ghir_A07G010080	K17961	trimethyltridecatetraene/dimethylnonatriene synthase [EC:1.14.14.58 1.14.14.59]
Ghir_A07G013570	K17961	trimethyltridecatetraene/dimethylnonatriene synthase [EC:1.14.14.58 1.14.14.59]
Ghir_A11G004850	K09755	ferulate-5-hydroxylase [EC:1.14.-.-]
Ghir_A11G018850	K09755	ferulate-5-hydroxylase [EC:1.14.-.-]
Ghir_A13G002760	K09755	ferulate-5-hydroxylase [EC:1.14.-.-]
Ghir_D10G009660	K09755	ferulate-5-hydroxylase [EC:1.14.-.-]
Ghir_D11G004750	K09755	ferulate-5-hydroxylase [EC:1.14.-.-]
Ghir_D11G004750	K09755	ferulate-5-hydroxylase [EC:1.14.-.-]
Ghir_D11G004750	K09755	ferulate-5-hydroxylase [EC:1.14.-.-]
Ghir_D11G019000	K09755	ferulate-5-hydroxylase [EC:1.14.-.-]
Ghir_D13G003070	K09755	ferulate-5-hydroxylase [EC:1.14.-.-]
Ghir_A10G009580	K09755	ferulate-5-hydroxylase [EC:1.14.-.-]
Ghir_A13G007990	K09590	brassinosteroid-6-oxidase 1 [EC:1.14.-.-]
Ghir_D07G008810	K09590	brassinosteroid-6-oxidase 1 [EC:1.14.-.-]
Ghir_D07G019590	K09590	brassinosteroid-6-oxidase 1 [EC:1.14.-.-]
Ghir_D07G019590	K09590	brassinosteroid-6-oxidase 1 [EC:1.14.-.-]
Ghir_D13G008760	K09590	brassinosteroid-6-oxidase 1 [EC:1.14.-.-]
Ghir_A07G008770	K09590	brassinosteroid-6-oxidase 1 [EC:1.14.-.-]
Ghir_A07G008770	K09590	brassinosteroid-6-oxidase 1 [EC:1.14.-.-]
Ghir_A07G019260	K09590	brassinosteroid-6-oxidase 1 [EC:1.14.-.-]
Ghir_A07G019260	K09590	brassinosteroid-6-oxidase 1 [EC:1.14.-.-]
Ghir_D03G012980	K15401	long-chain fatty acid omega-monooxygenase [EC:1.14.14.80]
Ghir_D05G009150	K15401	long-chain fatty acid omega-monooxygenase [EC:1.14.14.80]
Ghir_D07G011090	K15401	long-chain fatty acid omega-monooxygenase [EC:1.14.14.80]
Ghir_A03G005900	K15401	long-chain fatty acid omega-monooxygenase [EC:1.14.14.80]
Ghir_A05G009150	K15401	long-chain fatty acid omega-monooxygenase [EC:1.14.14.80]
Ghir_A07G011080	K15401	long-chain fatty acid omega-monooxygenase [EC:1.14.14.80]
Ghir_A11G009660	K15398	fatty acid omega-hydroxylase [EC:1.14.-.-]
Ghir_A12G024280	K15398	fatty acid omega-hydroxylase [EC:1.14.-.-]
Ghir_A12G024280	K15398	fatty acid omega-hydroxylase [EC:1.14.-.-]
Ghir_D08G014860	K15398	fatty acid omega-hydroxylase [EC:1.14.-.-]
Ghir_D08G020100	K15398	fatty acid omega-hydroxylase [EC:1.14.-.-]
Ghir_D11G009630	K15398	fatty acid omega-hydroxylase [EC:1.14.-.-]
Ghir_D12G024250	K15398	fatty acid omega-hydroxylase [EC:1.14.-.-]
Ghir_A08G013970	K15398	fatty acid omega-hydroxylase [EC:1.14.-.-]
Ghir_A08G019160	K15398	fatty acid omega-hydroxylase [EC:1.14.-.-]
Ghir_A13G005990	K15402	fatty acid omega-hydroxylase [EC:1.14.-.-]
Ghir_D04G015950	K15402	fatty acid omega-hydroxylase [EC:1.14.-.-]
Ghir_A04G011610	K15402	fatty acid omega-hydroxylase [EC:1.14.-.-]
Ghir_A13G001030	K04123	ent-kaurenoic acid monooxygenase [EC:1.14.14.107]
Ghir_D06G017920	K04123	ent-kaurenoic acid monooxygenase [EC:1.14.14.107]
Ghir_D08G017520	K04123	ent-kaurenoic acid monooxygenase [EC:1.14.14.107]
Ghir_D08G017530	K04123	ent-kaurenoic acid monooxygenase [EC:1.14.14.107]
Ghir_D13G001310	K04123	ent-kaurenoic acid monooxygenase [EC:1.14.14.107]
Ghir_A06G016950	K04123	ent-kaurenoic acid monooxygenase [EC:1.14.14.107]
Ghir_A08G016680	K04123	ent-kaurenoic acid monooxygenase [EC:1.14.14.107]
Ghir_A08G016690	K04123	ent-kaurenoic acid monooxygenase [EC:1.14.14.107]
Ghir_A08G016700	K04123	ent-kaurenoic acid monooxygenase [EC:1.14.14.107]
Ghir_A08G016700	K04123	ent-kaurenoic acid monooxygenase [EC:1.14.14.107]
Ghir_A09G020710	K04123	ent-kaurenoic acid monooxygenase [EC:1.14.14.107]
Ghir_A09G020710	K04123	ent-kaurenoic acid monooxygenase [EC:1.14.14.107]
Ghir_A09G020710	K04123	ent-kaurenoic acid monooxygenase [EC:1.14.14.107]
Ghir_D06G018520	K09588	cytochrome P450 family 90 subfamily A polypeptide 1 [EC:1.14.-.-]
Ghir_D06G018520	K09588	cytochrome P450 family 90 subfamily A polypeptide 1 [EC:1.14.-.-]
Ghir_D06G018520	K09588	cytochrome P450 family 90 subfamily A polypeptide 1 [EC:1.14.-.-]
Ghir_D06G018520	K09588	cytochrome P450 family 90 subfamily A polypeptide 1 [EC:1.14.-.-]
Ghir_D06G018520	K09588	cytochrome P450 family 90 subfamily A polypeptide 1 [EC:1.14.-.-]
Ghir_D10G026380	K09588	cytochrome P450 family 90 subfamily A polypeptide 1 [EC:1.14.-.-]
Ghir_A06G017620	K09588	cytochrome P450 family 90 subfamily A polypeptide 1 [EC:1.14.-.-]
Ghir_A06G017620	K09588	cytochrome P450 family 90 subfamily A polypeptide 1 [EC:1.14.-.-]
Ghir_A10G023880	K09588	cytochrome P450 family 90 subfamily A polypeptide 1 [EC:1.14.-.-]
Ghir_A10G023880	K09588	cytochrome P450 family 90 subfamily A polypeptide 1 [EC:1.14.-.-]
Ghir_A11G019490	K09587	steroid 22-alpha-hydroxylase [EC:1.14.13.-]
Ghir_A11G019490	K09587	steroid 22-alpha-hydroxylase [EC:1.14.13.-]
Ghir_D11G019610	K09587	steroid 22-alpha-hydroxylase [EC:1.14.13.-]
Ghir_D11G019610	K09587	steroid 22-alpha-hydroxylase [EC:1.14.13.-]
Ghir_D11G019610	K09587	steroid 22-alpha-hydroxylase [EC:1.14.13.-]
Ghir_D11G019610	K09587	steroid 22-alpha-hydroxylase [EC:1.14.13.-]
Ghir_A02G018440	K12637	3-epi-6-deoxocathasterone 23-monooxygenase [EC:1.14.14.147]
Ghir_A02G018440	K12637	3-epi-6-deoxocathasterone 23-monooxygenase [EC:1.14.14.147]
Ghir_A02G018440	K12637	3-epi-6-deoxocathasterone 23-monooxygenase [EC:1.14.14.147]
Ghir_A02G018440	K12637	3-epi-6-deoxocathasterone 23-monooxygenase [EC:1.14.14.147]
Ghir_A11G019000	K12637	3-epi-6-deoxocathasterone 23-monooxygenase [EC:1.14.14.147]
Ghir_A11G019000	K12637	3-epi-6-deoxocathasterone 23-monooxygenase [EC:1.14.14.147]
Ghir_D03G001170	K12637	3-epi-6-deoxocathasterone 23-monooxygenase [EC:1.14.14.147]
Ghir_D11G019140	K12637	3-epi-6-deoxocathasterone 23-monooxygenase [EC:1.14.14.147]
Ghir_D11G019140	K12637	3-epi-6-deoxocathasterone 23-monooxygenase [EC:1.14.14.147]
Ghir_D05G013620	K12638	3-epi-6-deoxocathasterone 23-monooxygenase [EC:1.14.14.147]
Ghir_D05G013620	K12638	3-epi-6-deoxocathasterone 23-monooxygenase [EC:1.14.14.147]
Ghir_D05G013620	K12638	3-epi-6-deoxocathasterone 23-monooxygenase [EC:1.14.14.147]
Ghir_A05G013890	K12638	3-epi-6-deoxocathasterone 23-monooxygenase [EC:1.14.14.147]
Ghir_A11G014330	K20623	typhasterol/6-deoxotyphasterol 2alpha-hydroxylase
Ghir_D06G008320	K20623	typhasterol/6-deoxotyphasterol 2alpha-hydroxylase
Ghir_D10G006040	K20623	typhasterol/6-deoxotyphasterol 2alpha-hydroxylase
Ghir_D10G006050	K20623	typhasterol/6-deoxotyphasterol 2alpha-hydroxylase
Ghir_D11G014380	K20623	typhasterol/6-deoxotyphasterol 2alpha-hydroxylase
Ghir_A06G008100	K20623	typhasterol/6-deoxotyphasterol 2alpha-hydroxylase
Ghir_A10G005200	K20623	typhasterol/6-deoxotyphasterol 2alpha-hydroxylase
Ghir_A10G005210	K20623	typhasterol/6-deoxotyphasterol 2alpha-hydroxylase
Ghir_D07G022780	K20769	fatty acid omega-hydroxylase [EC:1.14.-.-]
Ghir_D08G020660	K20769	fatty acid omega-hydroxylase [EC:1.14.-.-]
Ghir_A07G022070	K20769	fatty acid omega-hydroxylase [EC:1.14.-.-]
Ghir_A08G019780	K20769	fatty acid omega-hydroxylase [EC:1.14.-.-]
Ghir_A11G004150	K20665	jasmonoyl-L-amino acid 12-hydroxylase [EC:1.14.14.48]
Ghir_D03G012640	K20665	jasmonoyl-L-amino acid 12-hydroxylase [EC:1.14.14.48]
Ghir_D04G008240	K20665	jasmonoyl-L-amino acid 12-hydroxylase [EC:1.14.14.48]
Ghir_A03G006240	K20665	jasmonoyl-L-amino acid 12-hydroxylase [EC:1.14.14.48]
Ghir_D09G003930	K20665	jasmonoyl-L-amino acid 12-hydroxylase [EC:1.14.14.48]
Ghir_D11G004090	K20665	jasmonoyl-L-amino acid 12-hydroxylase [EC:1.14.14.48]
Ghir_A05G035070	K20665	jasmonoyl-L-amino acid 12-hydroxylase [EC:1.14.14.48]
Ghir_A09G003980	K20665	jasmonoyl-L-amino acid 12-hydroxylase [EC:1.14.14.48]
Ghir_A01G020040	K20624	12-hydroxyjasmonoyl-L-amino acid 12-hydroxylase / fatty acid hydroxylase [EC:1.14.14.49]
Ghir_D01G021560	K20624	12-hydroxyjasmonoyl-L-amino acid 12-hydroxylase / fatty acid hydroxylase [EC:1.14.14.49]
Ghir_D04G011120	K20624	12-hydroxyjasmonoyl-L-amino acid 12-hydroxylase / fatty acid hydroxylase [EC:1.14.14.49]
Ghir_D05G008540	K20624	12-hydroxyjasmonoyl-L-amino acid 12-hydroxylase / fatty acid hydroxylase [EC:1.14.14.49]
Ghir_D08G000900	K20624	12-hydroxyjasmonoyl-L-amino acid 12-hydroxylase / fatty acid hydroxylase [EC:1.14.14.49]
Ghir_D09G010010	K20624	12-hydroxyjasmonoyl-L-amino acid 12-hydroxylase / fatty acid hydroxylase [EC:1.14.14.49]
Ghir_D09G014380	K20624	12-hydroxyjasmonoyl-L-amino acid 12-hydroxylase / fatty acid hydroxylase [EC:1.14.14.49]
Ghir_A04G006720	K20624	12-hydroxyjasmonoyl-L-amino acid 12-hydroxylase / fatty acid hydroxylase [EC:1.14.14.49]
Ghir_A05G008550	K20624	12-hydroxyjasmonoyl-L-amino acid 12-hydroxylase / fatty acid hydroxylase [EC:1.14.14.49]
Ghir_A08G000900	K20624	12-hydroxyjasmonoyl-L-amino acid 12-hydroxylase / fatty acid hydroxylase [EC:1.14.14.49]
Ghir_A09G010250	K20624	12-hydroxyjasmonoyl-L-amino acid 12-hydroxylase / fatty acid hydroxylase [EC:1.14.14.49]
Ghir_A09G014740	K20624	12-hydroxyjasmonoyl-L-amino acid 12-hydroxylase / fatty acid hydroxylase [EC:1.14.14.49]
Ghir_A13G016310	K15747	beta-ring hydroxylase [EC:1.14.-.-]
Ghir_D13G017030	K15747	beta-ring hydroxylase [EC:1.14.-.-]
Ghir_A11G034890	K09837	carotenoid epsilon hydroxylase [EC:1.14.14.158]
Ghir_D11G035730	K09837	carotenoid epsilon hydroxylase [EC:1.14.14.158]
Ghir_D11G035730	K09837	carotenoid epsilon hydroxylase [EC:1.14.14.158]
Ghir_A01G019090	K09754	5-O-(4-coumaroyl)-D-quinate 3'-monooxygenase [EC:1.14.14.96]
Ghir_D01G020560	K09754	5-O-(4-coumaroyl)-D-quinate 3'-monooxygenase [EC:1.14.14.96]
Ghir_Scaffold423G000140	K09754	5-O-(4-coumaroyl)-D-quinate 3'-monooxygenase [EC:1.14.14.96]
Ghir_D05G020310	K04122	ent-kaurene oxidase [EC:1.14.14.86]
Ghir_D06G001280	K04122	ent-kaurene oxidase [EC:1.14.14.86]
Ghir_A05G020360	K04122	ent-kaurene oxidase [EC:1.14.14.86]
Ghir_A06G001420	K04122	ent-kaurene oxidase [EC:1.14.14.86]
Ghir_A06G001420	K04122	ent-kaurene oxidase [EC:1.14.14.86]
Ghir_A06G001420	K04122	ent-kaurene oxidase [EC:1.14.14.86]
Ghir_A06G001420	K04122	ent-kaurene oxidase [EC:1.14.14.86]
Ghir_A12G012140	K20496	laurate 7-monooxygenase [EC:1.14.14.130]
Ghir_D12G012350	K20496	laurate 7-monooxygenase [EC:1.14.14.130]
Ghir_A12G017480	K20495	long-chain fatty acid omega-monooxygenase [EC:1.14.14.80]
Ghir_D12G017700	K20495	long-chain fatty acid omega-monooxygenase [EC:1.14.14.80]
Ghir_A12G021380	K09843	(+)-abscisic acid 8'-hydroxylase [EC:1.14.14.137]
Ghir_A12G021380	K09843	(+)-abscisic acid 8'-hydroxylase [EC:1.14.14.137]
Ghir_A12G021380	K09843	(+)-abscisic acid 8'-hydroxylase [EC:1.14.14.137]
Ghir_A12G021380	K09843	(+)-abscisic acid 8'-hydroxylase [EC:1.14.14.137]
Ghir_A12G021380	K09843	(+)-abscisic acid 8'-hydroxylase [EC:1.14.14.137]
Ghir_A12G021380	K09843	(+)-abscisic acid 8'-hydroxylase [EC:1.14.14.137]
Ghir_A12G021380	K09843	(+)-abscisic acid 8'-hydroxylase [EC:1.14.14.137]
Ghir_A13G003830	K09843	(+)-abscisic acid 8'-hydroxylase [EC:1.14.14.137]
Ghir_A13G003830	K09843	(+)-abscisic acid 8'-hydroxylase [EC:1.14.14.137]
Ghir_D02G022140	K09843	(+)-abscisic acid 8'-hydroxylase [EC:1.14.14.137]
Ghir_D03G013510	K09843	(+)-abscisic acid 8'-hydroxylase [EC:1.14.14.137]
Ghir_D03G013510	K09843	(+)-abscisic acid 8'-hydroxylase [EC:1.14.14.137]
Ghir_D05G020710	K09843	(+)-abscisic acid 8'-hydroxylase [EC:1.14.14.137]
Ghir_D07G010800	K09843	(+)-abscisic acid 8'-hydroxylase [EC:1.14.14.137]
Ghir_D07G010800	K09843	(+)-abscisic acid 8'-hydroxylase [EC:1.14.14.137]
Ghir_D07G010800	K09843	(+)-abscisic acid 8'-hydroxylase [EC:1.14.14.137]
Ghir_D07G010800	K09843	(+)-abscisic acid 8'-hydroxylase [EC:1.14.14.137]
Ghir_D07G010800	K09843	(+)-abscisic acid 8'-hydroxylase [EC:1.14.14.137]
Ghir_A03G005260	K09843	(+)-abscisic acid 8'-hydroxylase [EC:1.14.14.137]
Ghir_A03G005260	K09843	(+)-abscisic acid 8'-hydroxylase [EC:1.14.14.137]
Ghir_A03G020710	K09843	(+)-abscisic acid 8'-hydroxylase [EC:1.14.14.137]
Ghir_A03G020710	K09843	(+)-abscisic acid 8'-hydroxylase [EC:1.14.14.137]
Ghir_A03G020710	K09843	(+)-abscisic acid 8'-hydroxylase [EC:1.14.14.137]
Ghir_A03G020710	K09843	(+)-abscisic acid 8'-hydroxylase [EC:1.14.14.137]
Ghir_A03G020710	K09843	(+)-abscisic acid 8'-hydroxylase [EC:1.14.14.137]
Ghir_D08G016580	K09843	(+)-abscisic acid 8'-hydroxylase [EC:1.14.14.137]
Ghir_D08G016580	K09843	(+)-abscisic acid 8'-hydroxylase [EC:1.14.14.137]
Ghir_D08G016580	K09843	(+)-abscisic acid 8'-hydroxylase [EC:1.14.14.137]
Ghir_D08G016580	K09843	(+)-abscisic acid 8'-hydroxylase [EC:1.14.14.137]
Ghir_D08G016580	K09843	(+)-abscisic acid 8'-hydroxylase [EC:1.14.14.137]
Ghir_D12G021400	K09843	(+)-abscisic acid 8'-hydroxylase [EC:1.14.14.137]
Ghir_D12G021400	K09843	(+)-abscisic acid 8'-hydroxylase [EC:1.14.14.137]
Ghir_D12G021400	K09843	(+)-abscisic acid 8'-hydroxylase [EC:1.14.14.137]
Ghir_D12G021400	K09843	(+)-abscisic acid 8'-hydroxylase [EC:1.14.14.137]
Ghir_D13G004030	K09843	(+)-abscisic acid 8'-hydroxylase [EC:1.14.14.137]
Ghir_A05G020770	K09843	(+)-abscisic acid 8'-hydroxylase [EC:1.14.14.137]
Ghir_A07G010740	K09843	(+)-abscisic acid 8'-hydroxylase [EC:1.14.14.137]
Ghir_A08G015750	K09843	(+)-abscisic acid 8'-hydroxylase [EC:1.14.14.137]
Ghir_A08G015750	K09843	(+)-abscisic acid 8'-hydroxylase [EC:1.14.14.137]
Ghir_A08G015750	K09843	(+)-abscisic acid 8'-hydroxylase [EC:1.14.14.137]
Ghir_D05G015160	K09832	sterol 22-desaturase [EC:1.14.19.41]
Ghir_D06G015540	K09832	sterol 22-desaturase [EC:1.14.19.41]
Ghir_A05G015330	K09832	sterol 22-desaturase [EC:1.14.19.41]
Ghir_A05G015340	K09832	sterol 22-desaturase [EC:1.14.19.41]
Ghir_A06G014830	K09832	sterol 22-desaturase [EC:1.14.19.41]
Ghir_D05G004440	K20771	carlactone C-19 oxidase [EC:1.14.-.-]
Ghir_A05G004330	K20771	carlactone C-19 oxidase [EC:1.14.-.-]
Ghir_A12G010590	K20661	cytochrome P450 family 714 subfamily A polypeptide 1
Ghir_A13G001550	K20661	cytochrome P450 family 714 subfamily A polypeptide 1
Ghir_D04G001180	K20661	cytochrome P450 family 714 subfamily A polypeptide 1
Ghir_D04G001180	K20661	cytochrome P450 family 714 subfamily A polypeptide 1
Ghir_D04G002220	K20661	cytochrome P450 family 714 subfamily A polypeptide 1
Ghir_D04G002230	K20661	cytochrome P450 family 714 subfamily A polypeptide 1
Ghir_D12G010790	K20661	cytochrome P450 family 714 subfamily A polypeptide 1
Ghir_A05G006540	K20661	cytochrome P450 family 714 subfamily A polypeptide 1
Ghir_A05G006540	K20661	cytochrome P450 family 714 subfamily A polypeptide 1
Ghir_A05G006540	K20661	cytochrome P450 family 714 subfamily A polypeptide 1
Ghir_A05G009940	K20661	cytochrome P450 family 714 subfamily A polypeptide 1
Ghir_A05G040720	K20661	cytochrome P450 family 714 subfamily A polypeptide 1
Ghir_A05G041750	K20661	cytochrome P450 family 714 subfamily A polypeptide 1
Ghir_A05G041750	K20661	cytochrome P450 family 714 subfamily A polypeptide 1
Ghir_A13G012350	K20667	beta-amyrin 28-monooxygenase [EC:1.14.14.126]
Ghir_A13G012500	K20667	beta-amyrin 28-monooxygenase [EC:1.14.14.126]
Ghir_D05G011630	K20667	beta-amyrin 28-monooxygenase [EC:1.14.14.126]
Ghir_D08G002010	K20667	beta-amyrin 28-monooxygenase [EC:1.14.14.126]
Ghir_D10G000860	K20667	beta-amyrin 28-monooxygenase [EC:1.14.14.126]
Ghir_D10G024870	K20667	beta-amyrin 28-monooxygenase [EC:1.14.14.126]
Ghir_D13G012910	K20667	beta-amyrin 28-monooxygenase [EC:1.14.14.126]
Ghir_D13G013060	K20667	beta-amyrin 28-monooxygenase [EC:1.14.14.126]
Ghir_A05G011870	K20667	beta-amyrin 28-monooxygenase [EC:1.14.14.126]
Ghir_A08G001940	K20667	beta-amyrin 28-monooxygenase [EC:1.14.14.126]
Ghir_A08G001940	K20667	beta-amyrin 28-monooxygenase [EC:1.14.14.126]
Ghir_A10G000100	K20667	beta-amyrin 28-monooxygenase [EC:1.14.14.126]
Ghir_A11G015640	K12639	cytochrome P450 family 724 subfamily B polypeptide 1 [EC:1.14.13.-]
Ghir_D04G006260	K12639	cytochrome P450 family 724 subfamily B polypeptide 1 [EC:1.14.13.-]
Ghir_D11G015660	K12639	cytochrome P450 family 724 subfamily B polypeptide 1 [EC:1.14.13.-]
Ghir_A05G036810	K12639	cytochrome P450 family 724 subfamily B polypeptide 1 [EC:1.14.13.-]
Ghir_A02G002440	K15639	PHYB activation tagged suppressor 1 [EC:1.14.-.-]
Ghir_A13G003600	K15639	PHYB activation tagged suppressor 1 [EC:1.14.-.-]
Ghir_A13G003620	K15639	PHYB activation tagged suppressor 1 [EC:1.14.-.-]
Ghir_A13G003620	K15639	PHYB activation tagged suppressor 1 [EC:1.14.-.-]
Ghir_A13G003620	K15639	PHYB activation tagged suppressor 1 [EC:1.14.-.-]
Ghir_A13G003620	K15639	PHYB activation tagged suppressor 1 [EC:1.14.-.-]
Ghir_A13G005840	K15639	PHYB activation tagged suppressor 1 [EC:1.14.-.-]
Ghir_A13G008560	K15639	PHYB activation tagged suppressor 1 [EC:1.14.-.-]
Ghir_A13G009830	K15639	PHYB activation tagged suppressor 1 [EC:1.14.-.-]
Ghir_D02G002840	K15639	PHYB activation tagged suppressor 1 [EC:1.14.-.-]
Ghir_D02G002850	K15639	PHYB activation tagged suppressor 1 [EC:1.14.-.-]
Ghir_D02G002870	K15639	PHYB activation tagged suppressor 1 [EC:1.14.-.-]
Ghir_D02G002880	K15639	PHYB activation tagged suppressor 1 [EC:1.14.-.-]
Ghir_D04G020600	K15639	PHYB activation tagged suppressor 1 [EC:1.14.-.-]
Ghir_D04G020610	K15639	PHYB activation tagged suppressor 1 [EC:1.14.-.-]
Ghir_D05G002140	K15639	PHYB activation tagged suppressor 1 [EC:1.14.-.-]
Ghir_D06G006120	K15639	PHYB activation tagged suppressor 1 [EC:1.14.-.-]
Ghir_D07G000240	K15639	PHYB activation tagged suppressor 1 [EC:1.14.-.-]
Ghir_D07G020300	K15639	PHYB activation tagged suppressor 1 [EC:1.14.-.-]
Ghir_D08G026110	K15639	PHYB activation tagged suppressor 1 [EC:1.14.-.-]
Ghir_D10G015080	K15639	PHYB activation tagged suppressor 1 [EC:1.14.-.-]
Ghir_D13G003830	K15639	PHYB activation tagged suppressor 1 [EC:1.14.-.-]
Ghir_D13G003830	K15639	PHYB activation tagged suppressor 1 [EC:1.14.-.-]
Ghir_D13G006470	K15639	PHYB activation tagged suppressor 1 [EC:1.14.-.-]
Ghir_D13G008910	K15639	PHYB activation tagged suppressor 1 [EC:1.14.-.-]
Ghir_D13G008910	K15639	PHYB activation tagged suppressor 1 [EC:1.14.-.-]
Ghir_D13G008920	K15639	PHYB activation tagged suppressor 1 [EC:1.14.-.-]
Ghir_D13G008930	K15639	PHYB activation tagged suppressor 1 [EC:1.14.-.-]
Ghir_D13G009320	K15639	PHYB activation tagged suppressor 1 [EC:1.14.-.-]
Ghir_A04G015780	K15639	PHYB activation tagged suppressor 1 [EC:1.14.-.-]
Ghir_A04G015790	K15639	PHYB activation tagged suppressor 1 [EC:1.14.-.-]
Ghir_A05G001980	K15639	PHYB activation tagged suppressor 1 [EC:1.14.-.-]
Ghir_A06G006050	K15639	PHYB activation tagged suppressor 1 [EC:1.14.-.-]
Ghir_A06G006050	K15639	PHYB activation tagged suppressor 1 [EC:1.14.-.-]
Ghir_A07G000220	K15639	PHYB activation tagged suppressor 1 [EC:1.14.-.-]
Ghir_A08G025190	K15639	PHYB activation tagged suppressor 1 [EC:1.14.-.-]
Ghir_A08G025190	K15639	PHYB activation tagged suppressor 1 [EC:1.14.-.-]
Ghir_D13G025810	K15639	PHYB activation tagged suppressor 1 [EC:1.14.-.-]
Ghir_D13G025830	K15639	PHYB activation tagged suppressor 1 [EC:1.14.-.-]
Ghir_D13G025830	K15639	PHYB activation tagged suppressor 1 [EC:1.14.-.-]
Ghir_D13G025840	K15639	PHYB activation tagged suppressor 1 [EC:1.14.-.-]
Ghir_A11G017230	K10717	cytokinin trans-hydroxylase
Ghir_A11G017230	K10717	cytokinin trans-hydroxylase
Ghir_A12G005530	K10717	cytokinin trans-hydroxylase
Ghir_D11G017320	K10717	cytokinin trans-hydroxylase
Ghir_D12G005510	K10717	cytokinin trans-hydroxylase
Ghir_A01G005600	K20562	biphenyl-4-hydroxylase
Ghir_A01G005600	K20562	biphenyl-4-hydroxylase
Ghir_D01G005860	K20562	biphenyl-4-hydroxylase
Ghir_D09G005080	K20562	biphenyl-4-hydroxylase
Ghir_A09G001770	K20562	biphenyl-4-hydroxylase
Ghir_A09G005490	K20562	biphenyl-4-hydroxylase
Ghir_A09G021590	K20562	biphenyl-4-hydroxylase
Ghir_A09G021600	K20562	biphenyl-4-hydroxylase
Ghir_A12G019130	K07964	heparanase [EC:3.2.1.166]
Ghir_A12G019130	K07964	heparanase [EC:3.2.1.166]
Ghir_A12G019130	K07964	heparanase [EC:3.2.1.166]
Ghir_A12G019130	K07964	heparanase [EC:3.2.1.166]
Ghir_A12G019130	K07964	heparanase [EC:3.2.1.166]
Ghir_A12G019130	K07964	heparanase [EC:3.2.1.166]
Ghir_A12G019130	K07964	heparanase [EC:3.2.1.166]
Ghir_A12G019130	K07964	heparanase [EC:3.2.1.166]
Ghir_A12G019130	K07964	heparanase [EC:3.2.1.166]
Ghir_A12G019130	K07964	heparanase [EC:3.2.1.166]
Ghir_A12G019130	K07964	heparanase [EC:3.2.1.166]
Ghir_A12G019130	K07964	heparanase [EC:3.2.1.166]
Ghir_D05G029620	K07964	heparanase [EC:3.2.1.166]
Ghir_D06G005470	K07964	heparanase [EC:3.2.1.166]
Ghir_D06G005470	K07964	heparanase [EC:3.2.1.166]
Ghir_D06G005470	K07964	heparanase [EC:3.2.1.166]
Ghir_D08G009910	K07964	heparanase [EC:3.2.1.166]
Ghir_D08G027590	K07964	heparanase [EC:3.2.1.166]
Ghir_D09G001500	K07964	heparanase [EC:3.2.1.166]
Ghir_D09G024920	K07964	heparanase [EC:3.2.1.166]
Ghir_D10G025410	K07964	heparanase [EC:3.2.1.166]
Ghir_D10G026250	K07964	heparanase [EC:3.2.1.166]
Ghir_D10G026290	K07964	heparanase [EC:3.2.1.166]
Ghir_D12G019350	K07964	heparanase [EC:3.2.1.166]
Ghir_D12G019350	K07964	heparanase [EC:3.2.1.166]
Ghir_A06G005450	K07964	heparanase [EC:3.2.1.166]
Ghir_A08G009510	K07964	heparanase [EC:3.2.1.166]
Ghir_A09G000390	K07964	heparanase [EC:3.2.1.166]
Ghir_A09G001610	K07964	heparanase [EC:3.2.1.166]
Ghir_A09G001620	K07964	heparanase [EC:3.2.1.166]
Ghir_A09G025780	K07964	heparanase [EC:3.2.1.166]
Ghir_A09G025780	K07964	heparanase [EC:3.2.1.166]
Ghir_A09G025780	K07964	heparanase [EC:3.2.1.166]
Ghir_A09G025780	K07964	heparanase [EC:3.2.1.166]
Ghir_A10G022930	K07964	heparanase [EC:3.2.1.166]
Ghir_D08G027940	K07964	heparanase [EC:3.2.1.166]
Ghir_D08G027940	K07964	heparanase [EC:3.2.1.166]
Ghir_D08G027940	K07964	heparanase [EC:3.2.1.166]
Ghir_A11G005320	K01363	cathepsin B [EC:3.4.22.1]
Ghir_A11G011130	K01363	cathepsin B [EC:3.4.22.1]
Ghir_A11G011130	K01363	cathepsin B [EC:3.4.22.1]
Ghir_A11G011130	K01363	cathepsin B [EC:3.4.22.1]
Ghir_D11G005290	K01363	cathepsin B [EC:3.4.22.1]
Ghir_D11G011080	K01363	cathepsin B [EC:3.4.22.1]
Ghir_A02G012580	K15414	complement component 1 Q subcomponent-binding protein, mitochondrial
Ghir_A02G012580	K15414	complement component 1 Q subcomponent-binding protein, mitochondrial
Ghir_D03G006290	K15414	complement component 1 Q subcomponent-binding protein, mitochondrial
Ghir_D04G006920	K15414	complement component 1 Q subcomponent-binding protein, mitochondrial
Ghir_D05G006050	K15414	complement component 1 Q subcomponent-binding protein, mitochondrial
Ghir_D05G006050	K15414	complement component 1 Q subcomponent-binding protein, mitochondrial
Ghir_D05G006050	K15414	complement component 1 Q subcomponent-binding protein, mitochondrial
Ghir_D05G006100	K15414	complement component 1 Q subcomponent-binding protein, mitochondrial
Ghir_D05G012090	K15414	complement component 1 Q subcomponent-binding protein, mitochondrial
Ghir_D10G025270	K15414	complement component 1 Q subcomponent-binding protein, mitochondrial
Ghir_D10G025270	K15414	complement component 1 Q subcomponent-binding protein, mitochondrial
Ghir_A05G006000	K15414	complement component 1 Q subcomponent-binding protein, mitochondrial
Ghir_A05G006050	K15414	complement component 1 Q subcomponent-binding protein, mitochondrial
Ghir_A05G006050	K15414	complement component 1 Q subcomponent-binding protein, mitochondrial
Ghir_A05G012390	K15414	complement component 1 Q subcomponent-binding protein, mitochondrial
Ghir_A05G036120	K15414	complement component 1 Q subcomponent-binding protein, mitochondrial
Ghir_A10G022810	K15414	complement component 1 Q subcomponent-binding protein, mitochondrial
Ghir_D05G003190	K01513	ectonucleotide pyrophosphatase/phosphodiesterase family member 1/3 [EC:3.1.4.1 3.6.1.9]
Ghir_D06G007700	K01513	ectonucleotide pyrophosphatase/phosphodiesterase family member 1/3 [EC:3.1.4.1 3.6.1.9]
Ghir_A05G003060	K01513	ectonucleotide pyrophosphatase/phosphodiesterase family member 1/3 [EC:3.1.4.1 3.6.1.9]
Ghir_A02G010400	K01194	alpha,alpha-trehalase [EC:3.2.1.28]
Ghir_A02G010400	K01194	alpha,alpha-trehalase [EC:3.2.1.28]
Ghir_A11G001990	K01194	alpha,alpha-trehalase [EC:3.2.1.28]
Ghir_A11G001990	K01194	alpha,alpha-trehalase [EC:3.2.1.28]
Ghir_D11G002000	K01194	alpha,alpha-trehalase [EC:3.2.1.28]
Ghir_D11G002000	K01194	alpha,alpha-trehalase [EC:3.2.1.28]
Ghir_D11G002000	K01194	alpha,alpha-trehalase [EC:3.2.1.28]
Ghir_A01G014110	K19891	glucan endo-1,3-beta-glucosidase 1/2/3 [EC:3.2.1.39]
Ghir_A01G014110	K19891	glucan endo-1,3-beta-glucosidase 1/2/3 [EC:3.2.1.39]
Ghir_D01G015430	K19891	glucan endo-1,3-beta-glucosidase 1/2/3 [EC:3.2.1.39]
Ghir_D01G015430	K19891	glucan endo-1,3-beta-glucosidase 1/2/3 [EC:3.2.1.39]
Ghir_D01G015430	K19891	glucan endo-1,3-beta-glucosidase 1/2/3 [EC:3.2.1.39]
Ghir_D01G015430	K19891	glucan endo-1,3-beta-glucosidase 1/2/3 [EC:3.2.1.39]
Ghir_D01G015430	K19891	glucan endo-1,3-beta-glucosidase 1/2/3 [EC:3.2.1.39]
Ghir_D01G015430	K19891	glucan endo-1,3-beta-glucosidase 1/2/3 [EC:3.2.1.39]
Ghir_D02G014660	K19891	glucan endo-1,3-beta-glucosidase 1/2/3 [EC:3.2.1.39]
Ghir_D02G014660	K19891	glucan endo-1,3-beta-glucosidase 1/2/3 [EC:3.2.1.39]
Ghir_D02G014660	K19891	glucan endo-1,3-beta-glucosidase 1/2/3 [EC:3.2.1.39]
Ghir_D05G017520	K19891	glucan endo-1,3-beta-glucosidase 1/2/3 [EC:3.2.1.39]
Ghir_D07G019300	K19891	glucan endo-1,3-beta-glucosidase 1/2/3 [EC:3.2.1.39]
Ghir_A03G013410	K19891	glucan endo-1,3-beta-glucosidase 1/2/3 [EC:3.2.1.39]
Ghir_A03G013410	K19891	glucan endo-1,3-beta-glucosidase 1/2/3 [EC:3.2.1.39]
Ghir_A03G013410	K19891	glucan endo-1,3-beta-glucosidase 1/2/3 [EC:3.2.1.39]
Ghir_A03G013410	K19891	glucan endo-1,3-beta-glucosidase 1/2/3 [EC:3.2.1.39]
Ghir_D08G005860	K19891	glucan endo-1,3-beta-glucosidase 1/2/3 [EC:3.2.1.39]
Ghir_A05G017530	K19891	glucan endo-1,3-beta-glucosidase 1/2/3 [EC:3.2.1.39]
Ghir_A07G018920	K19891	glucan endo-1,3-beta-glucosidase 1/2/3 [EC:3.2.1.39]
Ghir_A07G018920	K19891	glucan endo-1,3-beta-glucosidase 1/2/3 [EC:3.2.1.39]
Ghir_A08G005720	K19891	glucan endo-1,3-beta-glucosidase 1/2/3 [EC:3.2.1.39]
Ghir_A08G005720	K19891	glucan endo-1,3-beta-glucosidase 1/2/3 [EC:3.2.1.39]
Ghir_D06G012040	K19892	glucan endo-1,3-beta-glucosidase 4 [EC:3.2.1.39]
Ghir_D06G012040	K19892	glucan endo-1,3-beta-glucosidase 4 [EC:3.2.1.39]
Ghir_D08G008610	K19892	glucan endo-1,3-beta-glucosidase 4 [EC:3.2.1.39]
Ghir_A06G011080	K19892	glucan endo-1,3-beta-glucosidase 4 [EC:3.2.1.39]
Ghir_A06G011080	K19892	glucan endo-1,3-beta-glucosidase 4 [EC:3.2.1.39]
Ghir_A06G011080	K19892	glucan endo-1,3-beta-glucosidase 4 [EC:3.2.1.39]
Ghir_A06G011080	K19892	glucan endo-1,3-beta-glucosidase 4 [EC:3.2.1.39]
Ghir_A06G011080	K19892	glucan endo-1,3-beta-glucosidase 4 [EC:3.2.1.39]
Ghir_A06G011080	K19892	glucan endo-1,3-beta-glucosidase 4 [EC:3.2.1.39]
Ghir_A08G008510	K19892	glucan endo-1,3-beta-glucosidase 4 [EC:3.2.1.39]
Ghir_A08G008510	K19892	glucan endo-1,3-beta-glucosidase 4 [EC:3.2.1.39]
Ghir_A08G008510	K19892	glucan endo-1,3-beta-glucosidase 4 [EC:3.2.1.39]
Ghir_D04G000850	K19893	glucan endo-1,3-beta-glucosidase 5/6 [EC:3.2.1.39]
Ghir_D08G008900	K19893	glucan endo-1,3-beta-glucosidase 5/6 [EC:3.2.1.39]
Ghir_A05G042080	K19893	glucan endo-1,3-beta-glucosidase 5/6 [EC:3.2.1.39]
Ghir_A08G008770	K19893	glucan endo-1,3-beta-glucosidase 5/6 [EC:3.2.1.39]
Ghir_D05G020100	K01404	leishmanolysin [EC:3.4.24.36]
Ghir_D05G026440	K01404	leishmanolysin [EC:3.4.24.36]
Ghir_D05G026440	K01404	leishmanolysin [EC:3.4.24.36]
Ghir_D06G000970	K01404	leishmanolysin [EC:3.4.24.36]
Ghir_A05G020090	K01404	leishmanolysin [EC:3.4.24.36]
Ghir_A05G020090	K01404	leishmanolysin [EC:3.4.24.36]
Ghir_A05G026410	K01404	leishmanolysin [EC:3.4.24.36]
Ghir_A05G026410	K01404	leishmanolysin [EC:3.4.24.36]
Ghir_A06G001120	K01404	leishmanolysin [EC:3.4.24.36]
Ghir_D05G034740	K01365	cathepsin L [EC:3.4.22.15]
Ghir_D05G034750	K01365	cathepsin L [EC:3.4.22.15]
Ghir_D05G034750	K01365	cathepsin L [EC:3.4.22.15]
Ghir_D12G002330	K01365	cathepsin L [EC:3.4.22.15]
Ghir_A04G004470	K01365	cathepsin L [EC:3.4.22.15]
Ghir_A04G004490	K01365	cathepsin L [EC:3.4.22.15]
Ghir_D08G011830	K00001	alcohol dehydrogenase [EC:1.1.1.1]
Ghir_D08G011830	K00001	alcohol dehydrogenase [EC:1.1.1.1]
Ghir_D08G011830	K00001	alcohol dehydrogenase [EC:1.1.1.1]
Ghir_D08G024630	K00001	alcohol dehydrogenase [EC:1.1.1.1]
Ghir_D08G024630	K00001	alcohol dehydrogenase [EC:1.1.1.1]
Ghir_A08G011520	K00001	alcohol dehydrogenase [EC:1.1.1.1]
Ghir_A08G023710	K00001	alcohol dehydrogenase [EC:1.1.1.1]
Ghir_A01G009620	K00121	S-(hydroxymethyl)glutathione dehydrogenase / alcohol dehydrogenase [EC:1.1.1.284 1.1.1.1]
Ghir_A01G009620	K00121	S-(hydroxymethyl)glutathione dehydrogenase / alcohol dehydrogenase [EC:1.1.1.284 1.1.1.1]
Ghir_A02G014050	K00121	S-(hydroxymethyl)glutathione dehydrogenase / alcohol dehydrogenase [EC:1.1.1.284 1.1.1.1]
Ghir_A02G014050	K00121	S-(hydroxymethyl)glutathione dehydrogenase / alcohol dehydrogenase [EC:1.1.1.284 1.1.1.1]
Ghir_A02G014050	K00121	S-(hydroxymethyl)glutathione dehydrogenase / alcohol dehydrogenase [EC:1.1.1.284 1.1.1.1]
Ghir_D01G010360	K00121	S-(hydroxymethyl)glutathione dehydrogenase / alcohol dehydrogenase [EC:1.1.1.284 1.1.1.1]
Ghir_D03G005550	K00121	S-(hydroxymethyl)glutathione dehydrogenase / alcohol dehydrogenase [EC:1.1.1.284 1.1.1.1]
Ghir_D06G003560	K00121	S-(hydroxymethyl)glutathione dehydrogenase / alcohol dehydrogenase [EC:1.1.1.284 1.1.1.1]
Ghir_D06G009220	K00121	S-(hydroxymethyl)glutathione dehydrogenase / alcohol dehydrogenase [EC:1.1.1.284 1.1.1.1]
Ghir_D07G016650	K00121	S-(hydroxymethyl)glutathione dehydrogenase / alcohol dehydrogenase [EC:1.1.1.284 1.1.1.1]
Ghir_D07G022030	K00121	S-(hydroxymethyl)glutathione dehydrogenase / alcohol dehydrogenase [EC:1.1.1.284 1.1.1.1]
Ghir_D10G024160	K00121	S-(hydroxymethyl)glutathione dehydrogenase / alcohol dehydrogenase [EC:1.1.1.284 1.1.1.1]
Ghir_A06G003520	K00121	S-(hydroxymethyl)glutathione dehydrogenase / alcohol dehydrogenase [EC:1.1.1.284 1.1.1.1]
Ghir_A06G003520	K00121	S-(hydroxymethyl)glutathione dehydrogenase / alcohol dehydrogenase [EC:1.1.1.284 1.1.1.1]
Ghir_A06G003520	K00121	S-(hydroxymethyl)glutathione dehydrogenase / alcohol dehydrogenase [EC:1.1.1.284 1.1.1.1]
Ghir_A06G003520	K00121	S-(hydroxymethyl)glutathione dehydrogenase / alcohol dehydrogenase [EC:1.1.1.284 1.1.1.1]
Ghir_A06G003540	K00121	S-(hydroxymethyl)glutathione dehydrogenase / alcohol dehydrogenase [EC:1.1.1.284 1.1.1.1]
Ghir_A07G016360	K00121	S-(hydroxymethyl)glutathione dehydrogenase / alcohol dehydrogenase [EC:1.1.1.284 1.1.1.1]
Ghir_A07G016360	K00121	S-(hydroxymethyl)glutathione dehydrogenase / alcohol dehydrogenase [EC:1.1.1.284 1.1.1.1]
Ghir_A07G021940	K00121	S-(hydroxymethyl)glutathione dehydrogenase / alcohol dehydrogenase [EC:1.1.1.284 1.1.1.1]
Ghir_A10G022110	K00121	S-(hydroxymethyl)glutathione dehydrogenase / alcohol dehydrogenase [EC:1.1.1.284 1.1.1.1]
Ghir_A01G018310	K18857	alcohol dehydrogenase class-P [EC:1.1.1.1]
Ghir_A02G006900	K18857	alcohol dehydrogenase class-P [EC:1.1.1.1]
Ghir_A02G006920	K18857	alcohol dehydrogenase class-P [EC:1.1.1.1]
Ghir_A02G006930	K18857	alcohol dehydrogenase class-P [EC:1.1.1.1]
Ghir_A02G006950	K18857	alcohol dehydrogenase class-P [EC:1.1.1.1]
Ghir_A02G006960	K18857	alcohol dehydrogenase class-P [EC:1.1.1.1]
Ghir_A11G006250	K18857	alcohol dehydrogenase class-P [EC:1.1.1.1]
Ghir_A11G006250	K18857	alcohol dehydrogenase class-P [EC:1.1.1.1]
Ghir_A11G006250	K18857	alcohol dehydrogenase class-P [EC:1.1.1.1]
Ghir_D01G019800	K18857	alcohol dehydrogenase class-P [EC:1.1.1.1]
Ghir_D02G007330	K18857	alcohol dehydrogenase class-P [EC:1.1.1.1]
Ghir_D02G007350	K18857	alcohol dehydrogenase class-P [EC:1.1.1.1]
Ghir_D02G007370	K18857	alcohol dehydrogenase class-P [EC:1.1.1.1]
Ghir_D02G007380	K18857	alcohol dehydrogenase class-P [EC:1.1.1.1]
Ghir_D02G007380	K18857	alcohol dehydrogenase class-P [EC:1.1.1.1]
Ghir_D11G006190	K18857	alcohol dehydrogenase class-P [EC:1.1.1.1]
Ghir_D11G006190	K18857	alcohol dehydrogenase class-P [EC:1.1.1.1]
Ghir_A04G016200	K18857	alcohol dehydrogenase class-P [EC:1.1.1.1]
Ghir_A11G035370	K00002	alcohol dehydrogenase (NADP+) [EC:1.1.1.2]
Ghir_A12G016620	K00002	alcohol dehydrogenase (NADP+) [EC:1.1.1.2]
Ghir_A13G000500	K00002	alcohol dehydrogenase (NADP+) [EC:1.1.1.2]
Ghir_A13G000500	K00002	alcohol dehydrogenase (NADP+) [EC:1.1.1.2]
Ghir_D02G013860	K00002	alcohol dehydrogenase (NADP+) [EC:1.1.1.2]
Ghir_D02G013860	K00002	alcohol dehydrogenase (NADP+) [EC:1.1.1.2]
Ghir_D04G013440	K00002	alcohol dehydrogenase (NADP+) [EC:1.1.1.2]
Ghir_D04G013450	K00002	alcohol dehydrogenase (NADP+) [EC:1.1.1.2]
Ghir_D04G013450	K00002	alcohol dehydrogenase (NADP+) [EC:1.1.1.2]
Ghir_D04G013470	K00002	alcohol dehydrogenase (NADP+) [EC:1.1.1.2]
Ghir_D04G013480	K00002	alcohol dehydrogenase (NADP+) [EC:1.1.1.2]
Ghir_D04G013480	K00002	alcohol dehydrogenase (NADP+) [EC:1.1.1.2]
Ghir_A03G012290	K00002	alcohol dehydrogenase (NADP+) [EC:1.1.1.2]
Ghir_A03G012290	K00002	alcohol dehydrogenase (NADP+) [EC:1.1.1.2]
Ghir_A03G012320	K00002	alcohol dehydrogenase (NADP+) [EC:1.1.1.2]
Ghir_A03G012320	K00002	alcohol dehydrogenase (NADP+) [EC:1.1.1.2]
Ghir_D09G015690	K00002	alcohol dehydrogenase (NADP+) [EC:1.1.1.2]
Ghir_D09G015700	K00002	alcohol dehydrogenase (NADP+) [EC:1.1.1.2]
Ghir_D09G015700	K00002	alcohol dehydrogenase (NADP+) [EC:1.1.1.2]
Ghir_D09G015700	K00002	alcohol dehydrogenase (NADP+) [EC:1.1.1.2]
Ghir_D11G036230	K00002	alcohol dehydrogenase (NADP+) [EC:1.1.1.2]
Ghir_D11G036230	K00002	alcohol dehydrogenase (NADP+) [EC:1.1.1.2]
Ghir_D11G036230	K00002	alcohol dehydrogenase (NADP+) [EC:1.1.1.2]
Ghir_D12G016870	K00002	alcohol dehydrogenase (NADP+) [EC:1.1.1.2]
Ghir_D13G000790	K00002	alcohol dehydrogenase (NADP+) [EC:1.1.1.2]
Ghir_D13G000790	K00002	alcohol dehydrogenase (NADP+) [EC:1.1.1.2]
Ghir_D13G000810	K00002	alcohol dehydrogenase (NADP+) [EC:1.1.1.2]
Ghir_A04G009260	K00002	alcohol dehydrogenase (NADP+) [EC:1.1.1.2]
Ghir_A04G009270	K00002	alcohol dehydrogenase (NADP+) [EC:1.1.1.2]
Ghir_A04G009270	K00002	alcohol dehydrogenase (NADP+) [EC:1.1.1.2]
Ghir_A09G002960	K00002	alcohol dehydrogenase (NADP+) [EC:1.1.1.2]
Ghir_A09G016220	K00002	alcohol dehydrogenase (NADP+) [EC:1.1.1.2]
Ghir_A09G016230	K00002	alcohol dehydrogenase (NADP+) [EC:1.1.1.2]
Ghir_A04G016340	K00002	alcohol dehydrogenase (NADP+) [EC:1.1.1.2]
Ghir_A04G016350	K00002	alcohol dehydrogenase (NADP+) [EC:1.1.1.2]
Ghir_D08G025080	K12524	bifunctional aspartokinase / homoserine dehydrogenase 1 [EC:2.7.2.4 1.1.1.3]
Ghir_D08G025080	K12524	bifunctional aspartokinase / homoserine dehydrogenase 1 [EC:2.7.2.4 1.1.1.3]
Ghir_D08G025080	K12524	bifunctional aspartokinase / homoserine dehydrogenase 1 [EC:2.7.2.4 1.1.1.3]
Ghir_A08G024180	K12524	bifunctional aspartokinase / homoserine dehydrogenase 1 [EC:2.7.2.4 1.1.1.3]
Ghir_A08G024180	K12524	bifunctional aspartokinase / homoserine dehydrogenase 1 [EC:2.7.2.4 1.1.1.3]
Ghir_D04G001450	K00006	glycerol-3-phosphate dehydrogenase (NAD+) [EC:1.1.1.8]
Ghir_D06G017970	K00006	glycerol-3-phosphate dehydrogenase (NAD+) [EC:1.1.1.8]
Ghir_D06G017970	K00006	glycerol-3-phosphate dehydrogenase (NAD+) [EC:1.1.1.8]
Ghir_D06G017970	K00006	glycerol-3-phosphate dehydrogenase (NAD+) [EC:1.1.1.8]
Ghir_D09G003320	K00006	glycerol-3-phosphate dehydrogenase (NAD+) [EC:1.1.1.8]
Ghir_D09G012470	K00006	glycerol-3-phosphate dehydrogenase (NAD+) [EC:1.1.1.8]
Ghir_A05G036750	K00006	glycerol-3-phosphate dehydrogenase (NAD+) [EC:1.1.1.8]
Ghir_A05G041500	K00006	glycerol-3-phosphate dehydrogenase (NAD+) [EC:1.1.1.8]
Ghir_A06G017040	K00006	glycerol-3-phosphate dehydrogenase (NAD+) [EC:1.1.1.8]
Ghir_A06G017040	K00006	glycerol-3-phosphate dehydrogenase (NAD+) [EC:1.1.1.8]
Ghir_A09G003360	K00006	glycerol-3-phosphate dehydrogenase (NAD+) [EC:1.1.1.8]
Ghir_A09G003360	K00006	glycerol-3-phosphate dehydrogenase (NAD+) [EC:1.1.1.8]
Ghir_A09G003360	K00006	glycerol-3-phosphate dehydrogenase (NAD+) [EC:1.1.1.8]
Ghir_A09G003360	K00006	glycerol-3-phosphate dehydrogenase (NAD+) [EC:1.1.1.8]
Ghir_A09G012990	K00006	glycerol-3-phosphate dehydrogenase (NAD+) [EC:1.1.1.8]
Ghir_A09G012990	K00006	glycerol-3-phosphate dehydrogenase (NAD+) [EC:1.1.1.8]
Ghir_A09G012990	K00006	glycerol-3-phosphate dehydrogenase (NAD+) [EC:1.1.1.8]
Ghir_A09G012990	K00006	glycerol-3-phosphate dehydrogenase (NAD+) [EC:1.1.1.8]
Ghir_A12G027480	K00008	L-iditol 2-dehydrogenase [EC:1.1.1.14]
Ghir_A12G027490	K00008	L-iditol 2-dehydrogenase [EC:1.1.1.14]
Ghir_A12G027500	K00008	L-iditol 2-dehydrogenase [EC:1.1.1.14]
Ghir_D09G004320	K00008	L-iditol 2-dehydrogenase [EC:1.1.1.14]
Ghir_D12G027520	K00008	L-iditol 2-dehydrogenase [EC:1.1.1.14]
Ghir_D12G027530	K00008	L-iditol 2-dehydrogenase [EC:1.1.1.14]
Ghir_A09G026460	K00008	L-iditol 2-dehydrogenase [EC:1.1.1.14]
Ghir_A01G000360	K00011	aldehyde reductase [EC:1.1.1.21]
Ghir_D01G000370	K00011	aldehyde reductase [EC:1.1.1.21]
Ghir_D01G000370	K00011	aldehyde reductase [EC:1.1.1.21]
Ghir_D04G017830	K00011	aldehyde reductase [EC:1.1.1.21]
Ghir_A11G007870	K00012	UDPglucose 6-dehydrogenase [EC:1.1.1.22]
Ghir_A12G008090	K00012	UDPglucose 6-dehydrogenase [EC:1.1.1.22]
Ghir_A12G017280	K00012	UDPglucose 6-dehydrogenase [EC:1.1.1.22]
Ghir_A12G017280	K00012	UDPglucose 6-dehydrogenase [EC:1.1.1.22]
Ghir_A12G017280	K00012	UDPglucose 6-dehydrogenase [EC:1.1.1.22]
Ghir_A12G017280	K00012	UDPglucose 6-dehydrogenase [EC:1.1.1.22]
Ghir_A12G017280	K00012	UDPglucose 6-dehydrogenase [EC:1.1.1.22]
Ghir_A12G017280	K00012	UDPglucose 6-dehydrogenase [EC:1.1.1.22]
Ghir_A12G017280	K00012	UDPglucose 6-dehydrogenase [EC:1.1.1.22]
Ghir_A12G017280	K00012	UDPglucose 6-dehydrogenase [EC:1.1.1.22]
Ghir_A13G008300	K00012	UDPglucose 6-dehydrogenase [EC:1.1.1.22]
Ghir_A13G008300	K00012	UDPglucose 6-dehydrogenase [EC:1.1.1.22]
Ghir_D02G013240	K00012	UDPglucose 6-dehydrogenase [EC:1.1.1.22]
Ghir_D07G007600	K00012	UDPglucose 6-dehydrogenase [EC:1.1.1.22]
Ghir_A03G011740	K00012	UDPglucose 6-dehydrogenase [EC:1.1.1.22]
Ghir_D11G007820	K00012	UDPglucose 6-dehydrogenase [EC:1.1.1.22]
Ghir_D12G007650	K00012	UDPglucose 6-dehydrogenase [EC:1.1.1.22]
Ghir_D12G017500	K00012	UDPglucose 6-dehydrogenase [EC:1.1.1.22]
Ghir_D12G017500	K00012	UDPglucose 6-dehydrogenase [EC:1.1.1.22]
Ghir_D12G017500	K00012	UDPglucose 6-dehydrogenase [EC:1.1.1.22]
Ghir_D12G017500	K00012	UDPglucose 6-dehydrogenase [EC:1.1.1.22]
Ghir_D12G024400	K00012	UDPglucose 6-dehydrogenase [EC:1.1.1.22]
Ghir_D13G008450	K00012	UDPglucose 6-dehydrogenase [EC:1.1.1.22]
Ghir_A07G007590	K00012	UDPglucose 6-dehydrogenase [EC:1.1.1.22]
Ghir_A13G013110	K00013	histidinol dehydrogenase [EC:1.1.1.23]
Ghir_A13G013120	K00013	histidinol dehydrogenase [EC:1.1.1.23]
Ghir_D13G013830	K00013	histidinol dehydrogenase [EC:1.1.1.23]
Ghir_D13G013830	K00013	histidinol dehydrogenase [EC:1.1.1.23]
Ghir_D13G013830	K00013	histidinol dehydrogenase [EC:1.1.1.23]
Ghir_D13G013830	K00013	histidinol dehydrogenase [EC:1.1.1.23]
Ghir_D13G013830	K00013	histidinol dehydrogenase [EC:1.1.1.23]
Ghir_D13G013830	K00013	histidinol dehydrogenase [EC:1.1.1.23]
Ghir_A11G012630	K13832	3-dehydroquinate dehydratase / shikimate dehydrogenase [EC:4.2.1.10 1.1.1.25]
Ghir_A11G012640	K13832	3-dehydroquinate dehydratase / shikimate dehydrogenase [EC:4.2.1.10 1.1.1.25]
Ghir_A13G010500	K13832	3-dehydroquinate dehydratase / shikimate dehydrogenase [EC:4.2.1.10 1.1.1.25]
Ghir_A13G010500	K13832	3-dehydroquinate dehydratase / shikimate dehydrogenase [EC:4.2.1.10 1.1.1.25]
Ghir_A13G010500	K13832	3-dehydroquinate dehydratase / shikimate dehydrogenase [EC:4.2.1.10 1.1.1.25]
Ghir_D08G023580	K13832	3-dehydroquinate dehydratase / shikimate dehydrogenase [EC:4.2.1.10 1.1.1.25]
Ghir_D08G023580	K13832	3-dehydroquinate dehydratase / shikimate dehydrogenase [EC:4.2.1.10 1.1.1.25]
Ghir_D08G023580	K13832	3-dehydroquinate dehydratase / shikimate dehydrogenase [EC:4.2.1.10 1.1.1.25]
Ghir_D09G006610	K13832	3-dehydroquinate dehydratase / shikimate dehydrogenase [EC:4.2.1.10 1.1.1.25]
Ghir_D09G006610	K13832	3-dehydroquinate dehydratase / shikimate dehydrogenase [EC:4.2.1.10 1.1.1.25]
Ghir_D11G012570	K13832	3-dehydroquinate dehydratase / shikimate dehydrogenase [EC:4.2.1.10 1.1.1.25]
Ghir_D11G012570	K13832	3-dehydroquinate dehydratase / shikimate dehydrogenase [EC:4.2.1.10 1.1.1.25]
Ghir_D11G012570	K13832	3-dehydroquinate dehydratase / shikimate dehydrogenase [EC:4.2.1.10 1.1.1.25]
Ghir_D13G011100	K13832	3-dehydroquinate dehydratase / shikimate dehydrogenase [EC:4.2.1.10 1.1.1.25]
Ghir_A08G022680	K13832	3-dehydroquinate dehydratase / shikimate dehydrogenase [EC:4.2.1.10 1.1.1.25]
Ghir_A08G022680	K13832	3-dehydroquinate dehydratase / shikimate dehydrogenase [EC:4.2.1.10 1.1.1.25]
Ghir_A08G022680	K13832	3-dehydroquinate dehydratase / shikimate dehydrogenase [EC:4.2.1.10 1.1.1.25]
Ghir_A09G006900	K13832	3-dehydroquinate dehydratase / shikimate dehydrogenase [EC:4.2.1.10 1.1.1.25]
Ghir_A09G006900	K13832	3-dehydroquinate dehydratase / shikimate dehydrogenase [EC:4.2.1.10 1.1.1.25]
Ghir_A12G023280	K00016	L-lactate dehydrogenase [EC:1.1.1.27]
Ghir_D03G017610	K00016	L-lactate dehydrogenase [EC:1.1.1.27]
Ghir_A03G001450	K00016	L-lactate dehydrogenase [EC:1.1.1.27]
Ghir_D08G018830	K00016	L-lactate dehydrogenase [EC:1.1.1.27]
Ghir_D12G023240	K00016	L-lactate dehydrogenase [EC:1.1.1.27]
Ghir_A08G017930	K00016	L-lactate dehydrogenase [EC:1.1.1.27]
Ghir_A01G016150	K15893	glycerate dehydrogenase [EC:1.1.1.29]
Ghir_D01G017690	K15893	glycerate dehydrogenase [EC:1.1.1.29]
Ghir_D02G010830	K00020	3-hydroxyisobutyrate dehydrogenase [EC:1.1.1.31]
Ghir_D02G010830	K00020	3-hydroxyisobutyrate dehydrogenase [EC:1.1.1.31]
Ghir_D02G010830	K00020	3-hydroxyisobutyrate dehydrogenase [EC:1.1.1.31]
Ghir_D02G010830	K00020	3-hydroxyisobutyrate dehydrogenase [EC:1.1.1.31]
Ghir_A03G009720	K00020	3-hydroxyisobutyrate dehydrogenase [EC:1.1.1.31]
Ghir_A01G001400	K00021	hydroxymethylglutaryl-CoA reductase (NADPH) [EC:1.1.1.34]
Ghir_A01G011920	K00021	hydroxymethylglutaryl-CoA reductase (NADPH) [EC:1.1.1.34]
Ghir_A01G011930	K00021	hydroxymethylglutaryl-CoA reductase (NADPH) [EC:1.1.1.34]
Ghir_A12G001260	K00021	hydroxymethylglutaryl-CoA reductase (NADPH) [EC:1.1.1.34]
Ghir_A13G006400	K00021	hydroxymethylglutaryl-CoA reductase (NADPH) [EC:1.1.1.34]
Ghir_A13G006400	K00021	hydroxymethylglutaryl-CoA reductase (NADPH) [EC:1.1.1.34]
Ghir_D01G001400	K00021	hydroxymethylglutaryl-CoA reductase (NADPH) [EC:1.1.1.34]
Ghir_D01G001400	K00021	hydroxymethylglutaryl-CoA reductase (NADPH) [EC:1.1.1.34]
Ghir_D01G001400	K00021	hydroxymethylglutaryl-CoA reductase (NADPH) [EC:1.1.1.34]
Ghir_D01G013070	K00021	hydroxymethylglutaryl-CoA reductase (NADPH) [EC:1.1.1.34]
Ghir_D02G020020	K00021	hydroxymethylglutaryl-CoA reductase (NADPH) [EC:1.1.1.34]
Ghir_D02G020030	K00021	hydroxymethylglutaryl-CoA reductase (NADPH) [EC:1.1.1.34]
Ghir_D02G020040	K00021	hydroxymethylglutaryl-CoA reductase (NADPH) [EC:1.1.1.34]
Ghir_D02G020050	K00021	hydroxymethylglutaryl-CoA reductase (NADPH) [EC:1.1.1.34]
Ghir_D04G016360	K00021	hydroxymethylglutaryl-CoA reductase (NADPH) [EC:1.1.1.34]
Ghir_A03G018660	K00021	hydroxymethylglutaryl-CoA reductase (NADPH) [EC:1.1.1.34]
Ghir_A03G018670	K00021	hydroxymethylglutaryl-CoA reductase (NADPH) [EC:1.1.1.34]
Ghir_A03G018690	K00021	hydroxymethylglutaryl-CoA reductase (NADPH) [EC:1.1.1.34]
Ghir_A03G018700	K00021	hydroxymethylglutaryl-CoA reductase (NADPH) [EC:1.1.1.34]
Ghir_D12G001260	K00021	hydroxymethylglutaryl-CoA reductase (NADPH) [EC:1.1.1.34]
Ghir_D13G005900	K00021	hydroxymethylglutaryl-CoA reductase (NADPH) [EC:1.1.1.34]
Ghir_A04G016210	K00021	hydroxymethylglutaryl-CoA reductase (NADPH) [EC:1.1.1.34]
Ghir_A04G016210	K00021	hydroxymethylglutaryl-CoA reductase (NADPH) [EC:1.1.1.34]
Ghir_A04G016210	K00021	hydroxymethylglutaryl-CoA reductase (NADPH) [EC:1.1.1.34]
Ghir_A04G016210	K00021	hydroxymethylglutaryl-CoA reductase (NADPH) [EC:1.1.1.34]
Ghir_A04G016210	K00021	hydroxymethylglutaryl-CoA reductase (NADPH) [EC:1.1.1.34]
Ghir_A12G013990	K10527	enoyl-CoA hydratase/3-hydroxyacyl-CoA dehydrogenase [EC:4.2.1.17 1.1.1.35 1.1.1.211]
Ghir_D06G006830	K10527	enoyl-CoA hydratase/3-hydroxyacyl-CoA dehydrogenase [EC:4.2.1.17 1.1.1.35 1.1.1.211]
Ghir_D06G006830	K10527	enoyl-CoA hydratase/3-hydroxyacyl-CoA dehydrogenase [EC:4.2.1.17 1.1.1.35 1.1.1.211]
Ghir_D06G006830	K10527	enoyl-CoA hydratase/3-hydroxyacyl-CoA dehydrogenase [EC:4.2.1.17 1.1.1.35 1.1.1.211]
Ghir_D06G006830	K10527	enoyl-CoA hydratase/3-hydroxyacyl-CoA dehydrogenase [EC:4.2.1.17 1.1.1.35 1.1.1.211]
Ghir_D07G000650	K10527	enoyl-CoA hydratase/3-hydroxyacyl-CoA dehydrogenase [EC:4.2.1.17 1.1.1.35 1.1.1.211]
Ghir_D07G000650	K10527	enoyl-CoA hydratase/3-hydroxyacyl-CoA dehydrogenase [EC:4.2.1.17 1.1.1.35 1.1.1.211]
Ghir_D08G026300	K10527	enoyl-CoA hydratase/3-hydroxyacyl-CoA dehydrogenase [EC:4.2.1.17 1.1.1.35 1.1.1.211]
Ghir_D08G026300	K10527	enoyl-CoA hydratase/3-hydroxyacyl-CoA dehydrogenase [EC:4.2.1.17 1.1.1.35 1.1.1.211]
Ghir_D09G006740	K10527	enoyl-CoA hydratase/3-hydroxyacyl-CoA dehydrogenase [EC:4.2.1.17 1.1.1.35 1.1.1.211]
Ghir_D09G006740	K10527	enoyl-CoA hydratase/3-hydroxyacyl-CoA dehydrogenase [EC:4.2.1.17 1.1.1.35 1.1.1.211]
Ghir_D09G006740	K10527	enoyl-CoA hydratase/3-hydroxyacyl-CoA dehydrogenase [EC:4.2.1.17 1.1.1.35 1.1.1.211]
Ghir_D09G006740	K10527	enoyl-CoA hydratase/3-hydroxyacyl-CoA dehydrogenase [EC:4.2.1.17 1.1.1.35 1.1.1.211]
Ghir_D10G018310	K10527	enoyl-CoA hydratase/3-hydroxyacyl-CoA dehydrogenase [EC:4.2.1.17 1.1.1.35 1.1.1.211]
Ghir_D10G018310	K10527	enoyl-CoA hydratase/3-hydroxyacyl-CoA dehydrogenase [EC:4.2.1.17 1.1.1.35 1.1.1.211]
Ghir_D12G014100	K10527	enoyl-CoA hydratase/3-hydroxyacyl-CoA dehydrogenase [EC:4.2.1.17 1.1.1.35 1.1.1.211]
Ghir_A06G006720	K10527	enoyl-CoA hydratase/3-hydroxyacyl-CoA dehydrogenase [EC:4.2.1.17 1.1.1.35 1.1.1.211]
Ghir_A07G000530	K10527	enoyl-CoA hydratase/3-hydroxyacyl-CoA dehydrogenase [EC:4.2.1.17 1.1.1.35 1.1.1.211]
Ghir_A08G025400	K10527	enoyl-CoA hydratase/3-hydroxyacyl-CoA dehydrogenase [EC:4.2.1.17 1.1.1.35 1.1.1.211]
Ghir_A09G007030	K10527	enoyl-CoA hydratase/3-hydroxyacyl-CoA dehydrogenase [EC:4.2.1.17 1.1.1.35 1.1.1.211]
Ghir_A09G007030	K10527	enoyl-CoA hydratase/3-hydroxyacyl-CoA dehydrogenase [EC:4.2.1.17 1.1.1.35 1.1.1.211]
Ghir_A09G007030	K10527	enoyl-CoA hydratase/3-hydroxyacyl-CoA dehydrogenase [EC:4.2.1.17 1.1.1.35 1.1.1.211]
Ghir_A09G007030	K10527	enoyl-CoA hydratase/3-hydroxyacyl-CoA dehydrogenase [EC:4.2.1.17 1.1.1.35 1.1.1.211]
Ghir_A09G007030	K10527	enoyl-CoA hydratase/3-hydroxyacyl-CoA dehydrogenase [EC:4.2.1.17 1.1.1.35 1.1.1.211]
Ghir_A09G007030	K10527	enoyl-CoA hydratase/3-hydroxyacyl-CoA dehydrogenase [EC:4.2.1.17 1.1.1.35 1.1.1.211]
Ghir_A10G016860	K10527	enoyl-CoA hydratase/3-hydroxyacyl-CoA dehydrogenase [EC:4.2.1.17 1.1.1.35 1.1.1.211]
Ghir_A02G004040	K00025	malate dehydrogenase [EC:1.1.1.37]
Ghir_A02G004040	K00025	malate dehydrogenase [EC:1.1.1.37]
Ghir_A12G010330	K00025	malate dehydrogenase [EC:1.1.1.37]
Ghir_D02G004380	K00025	malate dehydrogenase [EC:1.1.1.37]
Ghir_D09G020660	K00025	malate dehydrogenase [EC:1.1.1.37]
Ghir_D12G010520	K00025	malate dehydrogenase [EC:1.1.1.37]
Ghir_A09G021280	K00025	malate dehydrogenase [EC:1.1.1.37]
Ghir_A10G011200	K00025	malate dehydrogenase [EC:1.1.1.37]
Ghir_A10G011200	K00025	malate dehydrogenase [EC:1.1.1.37]
Ghir_A10G011200	K00025	malate dehydrogenase [EC:1.1.1.37]
Ghir_A10G011200	K00025	malate dehydrogenase [EC:1.1.1.37]
Ghir_A10G011200	K00025	malate dehydrogenase [EC:1.1.1.37]
Ghir_A01G005000	K00026	malate dehydrogenase [EC:1.1.1.37]
Ghir_A01G017210	K00026	malate dehydrogenase [EC:1.1.1.37]
Ghir_A02G016310	K00026	malate dehydrogenase [EC:1.1.1.37]
Ghir_A02G016310	K00026	malate dehydrogenase [EC:1.1.1.37]
Ghir_A11G003640	K00026	malate dehydrogenase [EC:1.1.1.37]
Ghir_D01G005060	K00026	malate dehydrogenase [EC:1.1.1.37]
Ghir_D01G018720	K00026	malate dehydrogenase [EC:1.1.1.37]
Ghir_D03G003270	K00026	malate dehydrogenase [EC:1.1.1.37]
Ghir_D03G003270	K00026	malate dehydrogenase [EC:1.1.1.37]
Ghir_D03G010300	K00026	malate dehydrogenase [EC:1.1.1.37]
Ghir_D03G010300	K00026	malate dehydrogenase [EC:1.1.1.37]
Ghir_D03G010300	K00026	malate dehydrogenase [EC:1.1.1.37]
Ghir_D05G035230	K00026	malate dehydrogenase [EC:1.1.1.37]
Ghir_D07G007260	K00026	malate dehydrogenase [EC:1.1.1.37]
Ghir_A03G007810	K00026	malate dehydrogenase [EC:1.1.1.37]
Ghir_D08G002870	K00026	malate dehydrogenase [EC:1.1.1.37]
Ghir_D11G003610	K00026	malate dehydrogenase [EC:1.1.1.37]
Ghir_A04G003900	K00026	malate dehydrogenase [EC:1.1.1.37]
Ghir_A07G007260	K00026	malate dehydrogenase [EC:1.1.1.37]
Ghir_A08G002780	K00026	malate dehydrogenase [EC:1.1.1.37]
Ghir_A11G009350	K00028	malate dehydrogenase (decarboxylating) [EC:1.1.1.39]
Ghir_A11G009350	K00028	malate dehydrogenase (decarboxylating) [EC:1.1.1.39]
Ghir_A11G009350	K00028	malate dehydrogenase (decarboxylating) [EC:1.1.1.39]
Ghir_D01G015480	K00028	malate dehydrogenase (decarboxylating) [EC:1.1.1.39]
Ghir_D01G015480	K00028	malate dehydrogenase (decarboxylating) [EC:1.1.1.39]
Ghir_D01G015480	K00028	malate dehydrogenase (decarboxylating) [EC:1.1.1.39]
Ghir_D03G012040	K00028	malate dehydrogenase (decarboxylating) [EC:1.1.1.39]
Ghir_D03G012040	K00028	malate dehydrogenase (decarboxylating) [EC:1.1.1.39]
Ghir_D03G012040	K00028	malate dehydrogenase (decarboxylating) [EC:1.1.1.39]
Ghir_D03G012040	K00028	malate dehydrogenase (decarboxylating) [EC:1.1.1.39]
Ghir_D04G007680	K00028	malate dehydrogenase (decarboxylating) [EC:1.1.1.39]
Ghir_D04G007680	K00028	malate dehydrogenase (decarboxylating) [EC:1.1.1.39]
Ghir_D07G015510	K00028	malate dehydrogenase (decarboxylating) [EC:1.1.1.39]
Ghir_D07G015510	K00028	malate dehydrogenase (decarboxylating) [EC:1.1.1.39]
Ghir_D11G009340	K00028	malate dehydrogenase (decarboxylating) [EC:1.1.1.39]
Ghir_A05G034620	K00028	malate dehydrogenase (decarboxylating) [EC:1.1.1.39]
Ghir_A02G013120	K00029	malate dehydrogenase (oxaloacetate-decarboxylating)(NADP+) [EC:1.1.1.40]
Ghir_D03G005960	K00029	malate dehydrogenase (oxaloacetate-decarboxylating)(NADP+) [EC:1.1.1.40]
Ghir_D05G004900	K00029	malate dehydrogenase (oxaloacetate-decarboxylating)(NADP+) [EC:1.1.1.40]
Ghir_D06G009990	K00029	malate dehydrogenase (oxaloacetate-decarboxylating)(NADP+) [EC:1.1.1.40]
Ghir_D07G000910	K00029	malate dehydrogenase (oxaloacetate-decarboxylating)(NADP+) [EC:1.1.1.40]
Ghir_D07G002590	K00029	malate dehydrogenase (oxaloacetate-decarboxylating)(NADP+) [EC:1.1.1.40]
Ghir_D07G002590	K00029	malate dehydrogenase (oxaloacetate-decarboxylating)(NADP+) [EC:1.1.1.40]
Ghir_D10G007120	K00029	malate dehydrogenase (oxaloacetate-decarboxylating)(NADP+) [EC:1.1.1.40]
Ghir_A05G004790	K00029	malate dehydrogenase (oxaloacetate-decarboxylating)(NADP+) [EC:1.1.1.40]
Ghir_A05G004790	K00029	malate dehydrogenase (oxaloacetate-decarboxylating)(NADP+) [EC:1.1.1.40]
Ghir_A05G004790	K00029	malate dehydrogenase (oxaloacetate-decarboxylating)(NADP+) [EC:1.1.1.40]
Ghir_A05G004790	K00029	malate dehydrogenase (oxaloacetate-decarboxylating)(NADP+) [EC:1.1.1.40]
Ghir_A06G009660	K00029	malate dehydrogenase (oxaloacetate-decarboxylating)(NADP+) [EC:1.1.1.40]
Ghir_A06G009660	K00029	malate dehydrogenase (oxaloacetate-decarboxylating)(NADP+) [EC:1.1.1.40]
Ghir_A07G000900	K00029	malate dehydrogenase (oxaloacetate-decarboxylating)(NADP+) [EC:1.1.1.40]
Ghir_A07G002590	K00029	malate dehydrogenase (oxaloacetate-decarboxylating)(NADP+) [EC:1.1.1.40]
Ghir_A07G002590	K00029	malate dehydrogenase (oxaloacetate-decarboxylating)(NADP+) [EC:1.1.1.40]
Ghir_A07G002590	K00029	malate dehydrogenase (oxaloacetate-decarboxylating)(NADP+) [EC:1.1.1.40]
Ghir_A10G006280	K00029	malate dehydrogenase (oxaloacetate-decarboxylating)(NADP+) [EC:1.1.1.40]
Ghir_A10G006280	K00029	malate dehydrogenase (oxaloacetate-decarboxylating)(NADP+) [EC:1.1.1.40]
Ghir_A10G006280	K00029	malate dehydrogenase (oxaloacetate-decarboxylating)(NADP+) [EC:1.1.1.40]
Ghir_A12G003340	K00030	isocitrate dehydrogenase (NAD+) [EC:1.1.1.41]
Ghir_A12G005970	K00030	isocitrate dehydrogenase (NAD+) [EC:1.1.1.41]
Ghir_D04G018320	K00030	isocitrate dehydrogenase (NAD+) [EC:1.1.1.41]
Ghir_D04G018320	K00030	isocitrate dehydrogenase (NAD+) [EC:1.1.1.41]
Ghir_D04G018320	K00030	isocitrate dehydrogenase (NAD+) [EC:1.1.1.41]
Ghir_D09G015230	K00030	isocitrate dehydrogenase (NAD+) [EC:1.1.1.41]
Ghir_D12G003960	K00030	isocitrate dehydrogenase (NAD+) [EC:1.1.1.41]
Ghir_D12G005980	K00030	isocitrate dehydrogenase (NAD+) [EC:1.1.1.41]
Ghir_A04G013860	K00030	isocitrate dehydrogenase (NAD+) [EC:1.1.1.41]
Ghir_A04G013860	K00030	isocitrate dehydrogenase (NAD+) [EC:1.1.1.41]
Ghir_A09G015760	K00030	isocitrate dehydrogenase (NAD+) [EC:1.1.1.41]
Ghir_A11G017910	K00031	isocitrate dehydrogenase [EC:1.1.1.42]
Ghir_A11G017910	K00031	isocitrate dehydrogenase [EC:1.1.1.42]
Ghir_A11G017910	K00031	isocitrate dehydrogenase [EC:1.1.1.42]
Ghir_A13G013280	K00031	isocitrate dehydrogenase [EC:1.1.1.42]
Ghir_A13G013280	K00031	isocitrate dehydrogenase [EC:1.1.1.42]
Ghir_A13G013280	K00031	isocitrate dehydrogenase [EC:1.1.1.42]
Ghir_D01G021380	K00031	isocitrate dehydrogenase [EC:1.1.1.42]
Ghir_D09G002940	K00031	isocitrate dehydrogenase [EC:1.1.1.42]
Ghir_D09G002940	K00031	isocitrate dehydrogenase [EC:1.1.1.42]
Ghir_D10G009260	K00031	isocitrate dehydrogenase [EC:1.1.1.42]
Ghir_D10G009260	K00031	isocitrate dehydrogenase [EC:1.1.1.42]
Ghir_D11G017950	K00031	isocitrate dehydrogenase [EC:1.1.1.42]
Ghir_D13G014000	K00031	isocitrate dehydrogenase [EC:1.1.1.42]
Ghir_D13G014000	K00031	isocitrate dehydrogenase [EC:1.1.1.42]
Ghir_D13G014000	K00031	isocitrate dehydrogenase [EC:1.1.1.42]
Ghir_A09G003040	K00031	isocitrate dehydrogenase [EC:1.1.1.42]
Ghir_A09G003040	K00031	isocitrate dehydrogenase [EC:1.1.1.42]
Ghir_A09G003040	K00031	isocitrate dehydrogenase [EC:1.1.1.42]
Ghir_A09G003040	K00031	isocitrate dehydrogenase [EC:1.1.1.42]
Ghir_A10G009970	K00031	isocitrate dehydrogenase [EC:1.1.1.42]
Ghir_A10G009970	K00031	isocitrate dehydrogenase [EC:1.1.1.42]
Ghir_A12G024690	K00033	6-phosphogluconate dehydrogenase [EC:1.1.1.44 1.1.1.343]
Ghir_D07G019350	K00033	6-phosphogluconate dehydrogenase [EC:1.1.1.44 1.1.1.343]
Ghir_D08G005830	K00033	6-phosphogluconate dehydrogenase [EC:1.1.1.44 1.1.1.343]
Ghir_D08G005830	K00033	6-phosphogluconate dehydrogenase [EC:1.1.1.44 1.1.1.343]
Ghir_D08G005830	K00033	6-phosphogluconate dehydrogenase [EC:1.1.1.44 1.1.1.343]
Ghir_D08G005830	K00033	6-phosphogluconate dehydrogenase [EC:1.1.1.44 1.1.1.343]
Ghir_D12G024680	K00033	6-phosphogluconate dehydrogenase [EC:1.1.1.44 1.1.1.343]
Ghir_A04G015720	K00033	6-phosphogluconate dehydrogenase [EC:1.1.1.44 1.1.1.343]
Ghir_A07G019000	K00033	6-phosphogluconate dehydrogenase [EC:1.1.1.44 1.1.1.343]
Ghir_A07G019010	K00033	6-phosphogluconate dehydrogenase [EC:1.1.1.44 1.1.1.343]
Ghir_A08G005690	K00033	6-phosphogluconate dehydrogenase [EC:1.1.1.44 1.1.1.343]
Ghir_A08G005690	K00033	6-phosphogluconate dehydrogenase [EC:1.1.1.44 1.1.1.343]
Ghir_A08G005690	K00033	6-phosphogluconate dehydrogenase [EC:1.1.1.44 1.1.1.343]
Ghir_A01G002300	K00036	glucose-6-phosphate 1-dehydrogenase [EC:1.1.1.49 1.1.1.363]
Ghir_A01G002300	K00036	glucose-6-phosphate 1-dehydrogenase [EC:1.1.1.49 1.1.1.363]
Ghir_A11G015870	K00036	glucose-6-phosphate 1-dehydrogenase [EC:1.1.1.49 1.1.1.363]
Ghir_A11G029770	K00036	glucose-6-phosphate 1-dehydrogenase [EC:1.1.1.49 1.1.1.363]
Ghir_D01G002210	K00036	glucose-6-phosphate 1-dehydrogenase [EC:1.1.1.49 1.1.1.363]
Ghir_D01G002210	K00036	glucose-6-phosphate 1-dehydrogenase [EC:1.1.1.49 1.1.1.363]
Ghir_D02G017920	K00036	glucose-6-phosphate 1-dehydrogenase [EC:1.1.1.49 1.1.1.363]
Ghir_D02G017920	K00036	glucose-6-phosphate 1-dehydrogenase [EC:1.1.1.49 1.1.1.363]
Ghir_D04G008480	K00036	glucose-6-phosphate 1-dehydrogenase [EC:1.1.1.49 1.1.1.363]
Ghir_D04G008480	K00036	glucose-6-phosphate 1-dehydrogenase [EC:1.1.1.49 1.1.1.363]
Ghir_D07G024380	K00036	glucose-6-phosphate 1-dehydrogenase [EC:1.1.1.49 1.1.1.363]
Ghir_D07G024380	K00036	glucose-6-phosphate 1-dehydrogenase [EC:1.1.1.49 1.1.1.363]
Ghir_A03G016620	K00036	glucose-6-phosphate 1-dehydrogenase [EC:1.1.1.49 1.1.1.363]
Ghir_D09G003600	K00036	glucose-6-phosphate 1-dehydrogenase [EC:1.1.1.49 1.1.1.363]
Ghir_D11G015910	K00036	glucose-6-phosphate 1-dehydrogenase [EC:1.1.1.49 1.1.1.363]
Ghir_D11G029940	K00036	glucose-6-phosphate 1-dehydrogenase [EC:1.1.1.49 1.1.1.363]
Ghir_A07G024330	K00036	glucose-6-phosphate 1-dehydrogenase [EC:1.1.1.49 1.1.1.363]
Ghir_A07G024330	K00036	glucose-6-phosphate 1-dehydrogenase [EC:1.1.1.49 1.1.1.363]
Ghir_A09G003680	K00036	glucose-6-phosphate 1-dehydrogenase [EC:1.1.1.49 1.1.1.363]
Ghir_A09G003680	K00036	glucose-6-phosphate 1-dehydrogenase [EC:1.1.1.49 1.1.1.363]
Ghir_A09G003680	K00036	glucose-6-phosphate 1-dehydrogenase [EC:1.1.1.49 1.1.1.363]
Ghir_A09G003680	K00036	glucose-6-phosphate 1-dehydrogenase [EC:1.1.1.49 1.1.1.363]
Ghir_A09G003680	K00036	glucose-6-phosphate 1-dehydrogenase [EC:1.1.1.49 1.1.1.363]
Ghir_A09G003680	K00036	glucose-6-phosphate 1-dehydrogenase [EC:1.1.1.49 1.1.1.363]
Ghir_D02G016030	K10251	17beta-estradiol 17-dehydrogenase / very-long-chain 3-oxoacyl-CoA reductase [EC:1.1.1.62 1.1.1.330]
Ghir_D02G016050	K10251	17beta-estradiol 17-dehydrogenase / very-long-chain 3-oxoacyl-CoA reductase [EC:1.1.1.62 1.1.1.330]
Ghir_D03G013670	K10251	17beta-estradiol 17-dehydrogenase / very-long-chain 3-oxoacyl-CoA reductase [EC:1.1.1.62 1.1.1.330]
Ghir_D03G013670	K10251	17beta-estradiol 17-dehydrogenase / very-long-chain 3-oxoacyl-CoA reductase [EC:1.1.1.62 1.1.1.330]
Ghir_D03G013720	K10251	17beta-estradiol 17-dehydrogenase / very-long-chain 3-oxoacyl-CoA reductase [EC:1.1.1.62 1.1.1.330]
Ghir_A03G005030	K10251	17beta-estradiol 17-dehydrogenase / very-long-chain 3-oxoacyl-CoA reductase [EC:1.1.1.62 1.1.1.330]
Ghir_A03G005030	K10251	17beta-estradiol 17-dehydrogenase / very-long-chain 3-oxoacyl-CoA reductase [EC:1.1.1.62 1.1.1.330]
Ghir_A03G005110	K10251	17beta-estradiol 17-dehydrogenase / very-long-chain 3-oxoacyl-CoA reductase [EC:1.1.1.62 1.1.1.330]
Ghir_A03G014620	K10251	17beta-estradiol 17-dehydrogenase / very-long-chain 3-oxoacyl-CoA reductase [EC:1.1.1.62 1.1.1.330]
Ghir_A03G014620	K10251	17beta-estradiol 17-dehydrogenase / very-long-chain 3-oxoacyl-CoA reductase [EC:1.1.1.62 1.1.1.330]
Ghir_A03G014620	K10251	17beta-estradiol 17-dehydrogenase / very-long-chain 3-oxoacyl-CoA reductase [EC:1.1.1.62 1.1.1.330]
Ghir_A03G014630	K10251	17beta-estradiol 17-dehydrogenase / very-long-chain 3-oxoacyl-CoA reductase [EC:1.1.1.62 1.1.1.330]
Ghir_D08G011250	K05275	pyridoxine 4-dehydrogenase [EC:1.1.1.65]
Ghir_D08G011250	K05275	pyridoxine 4-dehydrogenase [EC:1.1.1.65]
Ghir_A08G010790	K05275	pyridoxine 4-dehydrogenase [EC:1.1.1.65]
Ghir_A08G010790	K05275	pyridoxine 4-dehydrogenase [EC:1.1.1.65]
Ghir_A08G010790	K05275	pyridoxine 4-dehydrogenase [EC:1.1.1.65]
Ghir_A08G010790	K05275	pyridoxine 4-dehydrogenase [EC:1.1.1.65]
Ghir_A12G023680	K15919	glyoxylate/hydroxypyruvate reductase [EC:1.1.1.79 1.1.1.81]
Ghir_D03G017030	K15919	glyoxylate/hydroxypyruvate reductase [EC:1.1.1.79 1.1.1.81]
Ghir_D03G017040	K15919	glyoxylate/hydroxypyruvate reductase [EC:1.1.1.79 1.1.1.81]
Ghir_D05G013080	K15919	glyoxylate/hydroxypyruvate reductase [EC:1.1.1.79 1.1.1.81]
Ghir_D07G015730	K15919	glyoxylate/hydroxypyruvate reductase [EC:1.1.1.79 1.1.1.81]
Ghir_D07G015730	K15919	glyoxylate/hydroxypyruvate reductase [EC:1.1.1.79 1.1.1.81]
Ghir_D07G015730	K15919	glyoxylate/hydroxypyruvate reductase [EC:1.1.1.79 1.1.1.81]
Ghir_D07G015730	K15919	glyoxylate/hydroxypyruvate reductase [EC:1.1.1.79 1.1.1.81]
Ghir_D07G015730	K15919	glyoxylate/hydroxypyruvate reductase [EC:1.1.1.79 1.1.1.81]
Ghir_D07G015730	K15919	glyoxylate/hydroxypyruvate reductase [EC:1.1.1.79 1.1.1.81]
Ghir_D07G015730	K15919	glyoxylate/hydroxypyruvate reductase [EC:1.1.1.79 1.1.1.81]
Ghir_D07G015740	K15919	glyoxylate/hydroxypyruvate reductase [EC:1.1.1.79 1.1.1.81]
Ghir_D07G015730	K15919	glyoxylate/hydroxypyruvate reductase [EC:1.1.1.79 1.1.1.81]
Ghir_A03G001910	K15919	glyoxylate/hydroxypyruvate reductase [EC:1.1.1.79 1.1.1.81]
Ghir_A03G001920	K15919	glyoxylate/hydroxypyruvate reductase [EC:1.1.1.79 1.1.1.81]
Ghir_D09G008680	K15919	glyoxylate/hydroxypyruvate reductase [EC:1.1.1.79 1.1.1.81]
Ghir_D09G008680	K15919	glyoxylate/hydroxypyruvate reductase [EC:1.1.1.79 1.1.1.81]
Ghir_D12G023670	K15919	glyoxylate/hydroxypyruvate reductase [EC:1.1.1.79 1.1.1.81]
Ghir_D12G023680	K15919	glyoxylate/hydroxypyruvate reductase [EC:1.1.1.79 1.1.1.81]
Ghir_D12G023680	K15919	glyoxylate/hydroxypyruvate reductase [EC:1.1.1.79 1.1.1.81]
Ghir_A05G013310	K15919	glyoxylate/hydroxypyruvate reductase [EC:1.1.1.79 1.1.1.81]
Ghir_A07G015490	K15919	glyoxylate/hydroxypyruvate reductase [EC:1.1.1.79 1.1.1.81]
Ghir_A09G009020	K15919	glyoxylate/hydroxypyruvate reductase [EC:1.1.1.79 1.1.1.81]
Ghir_A11G015530	K18121	glyoxylate/succinic semialdehyde reductase [EC:1.1.1.79 1.1.1.-]
Ghir_D07G009740	K18121	glyoxylate/succinic semialdehyde reductase [EC:1.1.1.79 1.1.1.-]
Ghir_D07G009740	K18121	glyoxylate/succinic semialdehyde reductase [EC:1.1.1.79 1.1.1.-]
Ghir_D10G006460	K18121	glyoxylate/succinic semialdehyde reductase [EC:1.1.1.79 1.1.1.-]
Ghir_D11G015560	K18121	glyoxylate/succinic semialdehyde reductase [EC:1.1.1.79 1.1.1.-]
Ghir_D11G015560	K18121	glyoxylate/succinic semialdehyde reductase [EC:1.1.1.79 1.1.1.-]
Ghir_A07G009660	K18121	glyoxylate/succinic semialdehyde reductase [EC:1.1.1.79 1.1.1.-]
Ghir_A07G009660	K18121	glyoxylate/succinic semialdehyde reductase [EC:1.1.1.79 1.1.1.-]
Ghir_A10G005620	K18121	glyoxylate/succinic semialdehyde reductase [EC:1.1.1.79 1.1.1.-]
Ghir_A12G023680	K15919	glyoxylate/hydroxypyruvate reductase [EC:1.1.1.79 1.1.1.81]
Ghir_D03G017030	K15919	glyoxylate/hydroxypyruvate reductase [EC:1.1.1.79 1.1.1.81]
Ghir_D03G017040	K15919	glyoxylate/hydroxypyruvate reductase [EC:1.1.1.79 1.1.1.81]
Ghir_D05G013080	K15919	glyoxylate/hydroxypyruvate reductase [EC:1.1.1.79 1.1.1.81]
Ghir_D07G015730	K15919	glyoxylate/hydroxypyruvate reductase [EC:1.1.1.79 1.1.1.81]
Ghir_D07G015730	K15919	glyoxylate/hydroxypyruvate reductase [EC:1.1.1.79 1.1.1.81]
Ghir_D07G015730	K15919	glyoxylate/hydroxypyruvate reductase [EC:1.1.1.79 1.1.1.81]
Ghir_D07G015730	K15919	glyoxylate/hydroxypyruvate reductase [EC:1.1.1.79 1.1.1.81]
Ghir_D07G015730	K15919	glyoxylate/hydroxypyruvate reductase [EC:1.1.1.79 1.1.1.81]
Ghir_D07G015730	K15919	glyoxylate/hydroxypyruvate reductase [EC:1.1.1.79 1.1.1.81]
Ghir_D07G015730	K15919	glyoxylate/hydroxypyruvate reductase [EC:1.1.1.79 1.1.1.81]
Ghir_D07G015740	K15919	glyoxylate/hydroxypyruvate reductase [EC:1.1.1.79 1.1.1.81]
Ghir_D07G015730	K15919	glyoxylate/hydroxypyruvate reductase [EC:1.1.1.79 1.1.1.81]
Ghir_A03G001910	K15919	glyoxylate/hydroxypyruvate reductase [EC:1.1.1.79 1.1.1.81]
Ghir_A03G001920	K15919	glyoxylate/hydroxypyruvate reductase [EC:1.1.1.79 1.1.1.81]
Ghir_D09G008680	K15919	glyoxylate/hydroxypyruvate reductase [EC:1.1.1.79 1.1.1.81]
Ghir_D09G008680	K15919	glyoxylate/hydroxypyruvate reductase [EC:1.1.1.79 1.1.1.81]
Ghir_D12G023670	K15919	glyoxylate/hydroxypyruvate reductase [EC:1.1.1.79 1.1.1.81]
Ghir_D12G023680	K15919	glyoxylate/hydroxypyruvate reductase [EC:1.1.1.79 1.1.1.81]
Ghir_D12G023680	K15919	glyoxylate/hydroxypyruvate reductase [EC:1.1.1.79 1.1.1.81]
Ghir_A05G013310	K15919	glyoxylate/hydroxypyruvate reductase [EC:1.1.1.79 1.1.1.81]
Ghir_A07G015490	K15919	glyoxylate/hydroxypyruvate reductase [EC:1.1.1.79 1.1.1.81]
Ghir_A09G009020	K15919	glyoxylate/hydroxypyruvate reductase [EC:1.1.1.79 1.1.1.81]
Ghir_D04G000670	K00051	malate dehydrogenase (NADP+) [EC:1.1.1.82]
Ghir_A05G042230	K00051	malate dehydrogenase (NADP+) [EC:1.1.1.82]
Ghir_D10G008360	K00052	3-isopropylmalate dehydrogenase [EC:1.1.1.85]
Ghir_D10G008360	K00052	3-isopropylmalate dehydrogenase [EC:1.1.1.85]
Ghir_D10G008360	K00052	3-isopropylmalate dehydrogenase [EC:1.1.1.85]
Ghir_A10G007020	K00052	3-isopropylmalate dehydrogenase [EC:1.1.1.85]
Ghir_D06G014880	K00053	ketol-acid reductoisomerase [EC:1.1.1.86]
Ghir_D07G006540	K00053	ketol-acid reductoisomerase [EC:1.1.1.86]
Ghir_D10G000030	K00053	ketol-acid reductoisomerase [EC:1.1.1.86]
Ghir_D10G000040	K00053	ketol-acid reductoisomerase [EC:1.1.1.86]
Ghir_A06G014110	K00053	ketol-acid reductoisomerase [EC:1.1.1.86]
Ghir_A07G006490	K00053	ketol-acid reductoisomerase [EC:1.1.1.86]
Ghir_D10G027690	K00053	ketol-acid reductoisomerase [EC:1.1.1.86]
Ghir_A12G002200	K00058	D-3-phosphoglycerate dehydrogenase / 2-oxoglutarate reductase [EC:1.1.1.95 1.1.1.399]
Ghir_A13G004160	K00058	D-3-phosphoglycerate dehydrogenase / 2-oxoglutarate reductase [EC:1.1.1.95 1.1.1.399]
Ghir_D04G017360	K00058	D-3-phosphoglycerate dehydrogenase / 2-oxoglutarate reductase [EC:1.1.1.95 1.1.1.399]
Ghir_D06G001930	K00058	D-3-phosphoglycerate dehydrogenase / 2-oxoglutarate reductase [EC:1.1.1.95 1.1.1.399]
Ghir_D12G002280	K00058	D-3-phosphoglycerate dehydrogenase / 2-oxoglutarate reductase [EC:1.1.1.95 1.1.1.399]
Ghir_D13G004300	K00058	D-3-phosphoglycerate dehydrogenase / 2-oxoglutarate reductase [EC:1.1.1.95 1.1.1.399]
Ghir_A04G012990	K00058	D-3-phosphoglycerate dehydrogenase / 2-oxoglutarate reductase [EC:1.1.1.95 1.1.1.399]
Ghir_A06G002080	K00058	D-3-phosphoglycerate dehydrogenase / 2-oxoglutarate reductase [EC:1.1.1.95 1.1.1.399]
Ghir_A11G027940	K00059	3-oxoacyl-[acyl-carrier protein] reductase [EC:1.1.1.100]
Ghir_D02G015760	K00059	3-oxoacyl-[acyl-carrier protein] reductase [EC:1.1.1.100]
Ghir_D05G032100	K00059	3-oxoacyl-[acyl-carrier protein] reductase [EC:1.1.1.100]
Ghir_D11G028110	K00059	3-oxoacyl-[acyl-carrier protein] reductase [EC:1.1.1.100]
Ghir_D11G028120	K00059	3-oxoacyl-[acyl-carrier protein] reductase [EC:1.1.1.100]
Ghir_D12G016190	K00059	3-oxoacyl-[acyl-carrier protein] reductase [EC:1.1.1.100]
Ghir_A05G032170	K00059	3-oxoacyl-[acyl-carrier protein] reductase [EC:1.1.1.100]
Ghir_A05G032170	K00059	3-oxoacyl-[acyl-carrier protein] reductase [EC:1.1.1.100]
Ghir_D04G008360	K04708	3-dehydrosphinganine reductase [EC:1.1.1.102]
Ghir_D05G023370	K04708	3-dehydrosphinganine reductase [EC:1.1.1.102]
Ghir_D05G023380	K04708	3-dehydrosphinganine reductase [EC:1.1.1.102]
Ghir_A05G023500	K04708	3-dehydrosphinganine reductase [EC:1.1.1.102]
Ghir_A05G035190	K04708	3-dehydrosphinganine reductase [EC:1.1.1.102]
Ghir_D03G012440	K22418	11beta/17beta-hydroxysteroid dehydrogenase [EC:1.1.1.146 1.1.1.-]
Ghir_D05G024170	K22418	11beta/17beta-hydroxysteroid dehydrogenase [EC:1.1.1.146 1.1.1.-]
Ghir_D07G005540	K22418	11beta/17beta-hydroxysteroid dehydrogenase [EC:1.1.1.146 1.1.1.-]
Ghir_D07G005550	K22418	11beta/17beta-hydroxysteroid dehydrogenase [EC:1.1.1.146 1.1.1.-]
Ghir_A03G006410	K22418	11beta/17beta-hydroxysteroid dehydrogenase [EC:1.1.1.146 1.1.1.-]
Ghir_A03G006410	K22418	11beta/17beta-hydroxysteroid dehydrogenase [EC:1.1.1.146 1.1.1.-]
Ghir_A05G024330	K22418	11beta/17beta-hydroxysteroid dehydrogenase [EC:1.1.1.146 1.1.1.-]
Ghir_A07G005530	K22418	11beta/17beta-hydroxysteroid dehydrogenase [EC:1.1.1.146 1.1.1.-]
Ghir_A09G026230	K22418	11beta/17beta-hydroxysteroid dehydrogenase [EC:1.1.1.146 1.1.1.-]
Ghir_A09G026230	K22418	11beta/17beta-hydroxysteroid dehydrogenase [EC:1.1.1.146 1.1.1.-]
Ghir_A09G026230	K22418	11beta/17beta-hydroxysteroid dehydrogenase [EC:1.1.1.146 1.1.1.-]
Ghir_A09G026230	K22418	11beta/17beta-hydroxysteroid dehydrogenase [EC:1.1.1.146 1.1.1.-]
Ghir_A09G026230	K22418	11beta/17beta-hydroxysteroid dehydrogenase [EC:1.1.1.146 1.1.1.-]
Ghir_A09G026230	K22418	11beta/17beta-hydroxysteroid dehydrogenase [EC:1.1.1.146 1.1.1.-]
Ghir_A09G026230	K22418	11beta/17beta-hydroxysteroid dehydrogenase [EC:1.1.1.146 1.1.1.-]
Ghir_A09G026230	K22418	11beta/17beta-hydroxysteroid dehydrogenase [EC:1.1.1.146 1.1.1.-]
Ghir_A09G026230	K22418	11beta/17beta-hydroxysteroid dehydrogenase [EC:1.1.1.146 1.1.1.-]
Ghir_A01G005300	K00074	3-hydroxybutyryl-CoA dehydrogenase [EC:1.1.1.157]
Ghir_D01G005520	K00074	3-hydroxybutyryl-CoA dehydrogenase [EC:1.1.1.157]
Ghir_A02G001320	K07748	sterol-4alpha-carboxylate 3-dehydrogenase (decarboxylating) [EC:1.1.1.170]
Ghir_A02G001320	K07748	sterol-4alpha-carboxylate 3-dehydrogenase (decarboxylating) [EC:1.1.1.170]
Ghir_A02G001320	K07748	sterol-4alpha-carboxylate 3-dehydrogenase (decarboxylating) [EC:1.1.1.170]
Ghir_A02G001320	K07748	sterol-4alpha-carboxylate 3-dehydrogenase (decarboxylating) [EC:1.1.1.170]
Ghir_D01G007670	K07748	sterol-4alpha-carboxylate 3-dehydrogenase (decarboxylating) [EC:1.1.1.170]
Ghir_D01G007670	K07748	sterol-4alpha-carboxylate 3-dehydrogenase (decarboxylating) [EC:1.1.1.170]
Ghir_D01G007670	K07748	sterol-4alpha-carboxylate 3-dehydrogenase (decarboxylating) [EC:1.1.1.170]
Ghir_D02G001400	K07748	sterol-4alpha-carboxylate 3-dehydrogenase (decarboxylating) [EC:1.1.1.170]
Ghir_D05G033550	K07748	sterol-4alpha-carboxylate 3-dehydrogenase (decarboxylating) [EC:1.1.1.170]
Ghir_D05G033550	K07748	sterol-4alpha-carboxylate 3-dehydrogenase (decarboxylating) [EC:1.1.1.170]
Ghir_D06G008770	K07748	sterol-4alpha-carboxylate 3-dehydrogenase (decarboxylating) [EC:1.1.1.170]
Ghir_D06G008770	K07748	sterol-4alpha-carboxylate 3-dehydrogenase (decarboxylating) [EC:1.1.1.170]
Ghir_D10G013290	K07748	sterol-4alpha-carboxylate 3-dehydrogenase (decarboxylating) [EC:1.1.1.170]
Ghir_D10G013300	K07748	sterol-4alpha-carboxylate 3-dehydrogenase (decarboxylating) [EC:1.1.1.170]
Ghir_A05G033200	K07748	sterol-4alpha-carboxylate 3-dehydrogenase (decarboxylating) [EC:1.1.1.170]
Ghir_A06G008540	K07748	sterol-4alpha-carboxylate 3-dehydrogenase (decarboxylating) [EC:1.1.1.170]
Ghir_A10G014270	K07748	sterol-4alpha-carboxylate 3-dehydrogenase (decarboxylating) [EC:1.1.1.170]
Ghir_A10G014270	K07748	sterol-4alpha-carboxylate 3-dehydrogenase (decarboxylating) [EC:1.1.1.170]
Ghir_A10G014270	K07748	sterol-4alpha-carboxylate 3-dehydrogenase (decarboxylating) [EC:1.1.1.170]
Ghir_A10G014270	K07748	sterol-4alpha-carboxylate 3-dehydrogenase (decarboxylating) [EC:1.1.1.170]
Ghir_A10G014270	K07748	sterol-4alpha-carboxylate 3-dehydrogenase (decarboxylating) [EC:1.1.1.170]
Ghir_A10G014270	K07748	sterol-4alpha-carboxylate 3-dehydrogenase (decarboxylating) [EC:1.1.1.170]
Ghir_A11G004450	K00079	carbonyl reductase 1 [EC:1.1.1.184 1.1.1.189 1.1.1.197]
Ghir_A03G006570	K00079	carbonyl reductase 1 [EC:1.1.1.184 1.1.1.189 1.1.1.197]
Ghir_A11G004450	K00079	carbonyl reductase 1 [EC:1.1.1.184 1.1.1.189 1.1.1.197]
Ghir_A03G006570	K00079	carbonyl reductase 1 [EC:1.1.1.184 1.1.1.189 1.1.1.197]
Ghir_D08G003880	K11752	diaminohydroxyphosphoribosylaminopyrimidine deaminase / 5-amino-6-(5-phosphoribosylamino)uracil reductase [EC:3.5.4.26 1.1.1.193]
Ghir_D08G024690	K11752	diaminohydroxyphosphoribosylaminopyrimidine deaminase / 5-amino-6-(5-phosphoribosylamino)uracil reductase [EC:3.5.4.26 1.1.1.193]
Ghir_A08G003700	K11752	diaminohydroxyphosphoribosylaminopyrimidine deaminase / 5-amino-6-(5-phosphoribosylamino)uracil reductase [EC:3.5.4.26 1.1.1.193]
Ghir_A08G023770	K11752	diaminohydroxyphosphoribosylaminopyrimidine deaminase / 5-amino-6-(5-phosphoribosylamino)uracil reductase [EC:3.5.4.26 1.1.1.193]
Ghir_A02G015270	K00083	cinnamyl-alcohol dehydrogenase [EC:1.1.1.195]
Ghir_A02G015270	K00083	cinnamyl-alcohol dehydrogenase [EC:1.1.1.195]
Ghir_A02G016080	K00083	cinnamyl-alcohol dehydrogenase [EC:1.1.1.195]
Ghir_A11G022110	K00083	cinnamyl-alcohol dehydrogenase [EC:1.1.1.195]
Ghir_A11G022120	K00083	cinnamyl-alcohol dehydrogenase [EC:1.1.1.195]
Ghir_A11G022130	K00083	cinnamyl-alcohol dehydrogenase [EC:1.1.1.195]
Ghir_A11G022130	K00083	cinnamyl-alcohol dehydrogenase [EC:1.1.1.195]
Ghir_A11G023410	K00083	cinnamyl-alcohol dehydrogenase [EC:1.1.1.195]
Ghir_A12G002160	K00083	cinnamyl-alcohol dehydrogenase [EC:1.1.1.195]
Ghir_A12G009480	K00083	cinnamyl-alcohol dehydrogenase [EC:1.1.1.195]
Ghir_A12G009490	K00083	cinnamyl-alcohol dehydrogenase [EC:1.1.1.195]
Ghir_A12G009500	K00083	cinnamyl-alcohol dehydrogenase [EC:1.1.1.195]
Ghir_A12G009510	K00083	cinnamyl-alcohol dehydrogenase [EC:1.1.1.195]
Ghir_A12G009520	K00083	cinnamyl-alcohol dehydrogenase [EC:1.1.1.195]
Ghir_A12G025660	K00083	cinnamyl-alcohol dehydrogenase [EC:1.1.1.195]
Ghir_A12G025660	K00083	cinnamyl-alcohol dehydrogenase [EC:1.1.1.195]
Ghir_A12G025660	K00083	cinnamyl-alcohol dehydrogenase [EC:1.1.1.195]
Ghir_A12G025660	K00083	cinnamyl-alcohol dehydrogenase [EC:1.1.1.195]
Ghir_D02G021850	K00083	cinnamyl-alcohol dehydrogenase [EC:1.1.1.195]
Ghir_D02G021850	K00083	cinnamyl-alcohol dehydrogenase [EC:1.1.1.195]
Ghir_D03G003460	K00083	cinnamyl-alcohol dehydrogenase [EC:1.1.1.195]
Ghir_D03G003460	K00083	cinnamyl-alcohol dehydrogenase [EC:1.1.1.195]
Ghir_D03G003480	K00083	cinnamyl-alcohol dehydrogenase [EC:1.1.1.195]
Ghir_D03G004930	K00083	cinnamyl-alcohol dehydrogenase [EC:1.1.1.195]
Ghir_D05G018820	K00083	cinnamyl-alcohol dehydrogenase [EC:1.1.1.195]
Ghir_D05G018820	K00083	cinnamyl-alcohol dehydrogenase [EC:1.1.1.195]
Ghir_A03G020420	K00083	cinnamyl-alcohol dehydrogenase [EC:1.1.1.195]
Ghir_D11G020990	K00083	cinnamyl-alcohol dehydrogenase [EC:1.1.1.195]
Ghir_D11G022270	K00083	cinnamyl-alcohol dehydrogenase [EC:1.1.1.195]
Ghir_D11G022290	K00083	cinnamyl-alcohol dehydrogenase [EC:1.1.1.195]
Ghir_D11G031350	K00083	cinnamyl-alcohol dehydrogenase [EC:1.1.1.195]
Ghir_D12G002230	K00083	cinnamyl-alcohol dehydrogenase [EC:1.1.1.195]
Ghir_D12G008030	K00083	cinnamyl-alcohol dehydrogenase [EC:1.1.1.195]
Ghir_D12G008050	K00083	cinnamyl-alcohol dehydrogenase [EC:1.1.1.195]
Ghir_D12G008060	K00083	cinnamyl-alcohol dehydrogenase [EC:1.1.1.195]
Ghir_D12G008060	K00083	cinnamyl-alcohol dehydrogenase [EC:1.1.1.195]
Ghir_D12G025680	K00083	cinnamyl-alcohol dehydrogenase [EC:1.1.1.195]
Ghir_A05G018810	K00083	cinnamyl-alcohol dehydrogenase [EC:1.1.1.195]
Ghir_A02G008980	K22395	cinnamyl-alcohol dehydrogenase [EC:1.1.1.195]
Ghir_A11G001000	K22395	cinnamyl-alcohol dehydrogenase [EC:1.1.1.195]
Ghir_A11G001020	K22395	cinnamyl-alcohol dehydrogenase [EC:1.1.1.195]
Ghir_D02G002120	K22395	cinnamyl-alcohol dehydrogenase [EC:1.1.1.195]
Ghir_D02G011070	K22395	cinnamyl-alcohol dehydrogenase [EC:1.1.1.195]
Ghir_D06G013250	K22395	cinnamyl-alcohol dehydrogenase [EC:1.1.1.195]
Ghir_D10G001020	K22395	cinnamyl-alcohol dehydrogenase [EC:1.1.1.195]
Ghir_D11G001050	K22395	cinnamyl-alcohol dehydrogenase [EC:1.1.1.195]
Ghir_A04G014390	K22395	cinnamyl-alcohol dehydrogenase [EC:1.1.1.195]
Ghir_A06G011260	K22395	cinnamyl-alcohol dehydrogenase [EC:1.1.1.195]
Ghir_A10G000290	K22395	cinnamyl-alcohol dehydrogenase [EC:1.1.1.195]
Ghir_A11G004450	K00079	carbonyl reductase 1 [EC:1.1.1.184 1.1.1.189 1.1.1.197]
Ghir_A03G006570	K00079	carbonyl reductase 1 [EC:1.1.1.184 1.1.1.189 1.1.1.197]
Ghir_A13G021860	K00088	IMP dehydrogenase [EC:1.1.1.205]
Ghir_A13G022940	K00088	IMP dehydrogenase [EC:1.1.1.205]
Ghir_D02G007640	K00088	IMP dehydrogenase [EC:1.1.1.205]
Ghir_D13G022610	K00088	IMP dehydrogenase [EC:1.1.1.205]
Ghir_A13G008840	K08081	tropinone reductase I [EC:1.1.1.206]
Ghir_A13G023860	K08081	tropinone reductase I [EC:1.1.1.206]
Ghir_A13G023870	K08081	tropinone reductase I [EC:1.1.1.206]
Ghir_A13G023910	K08081	tropinone reductase I [EC:1.1.1.206]
Ghir_A13G023920	K08081	tropinone reductase I [EC:1.1.1.206]
Ghir_A13G023920	K08081	tropinone reductase I [EC:1.1.1.206]
Ghir_A13G023930	K08081	tropinone reductase I [EC:1.1.1.206]
Ghir_D04G006860	K08081	tropinone reductase I [EC:1.1.1.206]
Ghir_D05G000100	K08081	tropinone reductase I [EC:1.1.1.206]
Ghir_D05G000110	K08081	tropinone reductase I [EC:1.1.1.206]
Ghir_D05G000110	K08081	tropinone reductase I [EC:1.1.1.206]
Ghir_D09G015740	K08081	tropinone reductase I [EC:1.1.1.206]
Ghir_D09G015740	K08081	tropinone reductase I [EC:1.1.1.206]
Ghir_D09G015740	K08081	tropinone reductase I [EC:1.1.1.206]
Ghir_D13G010160	K08081	tropinone reductase I [EC:1.1.1.206]
Ghir_D13G024610	K08081	tropinone reductase I [EC:1.1.1.206]
Ghir_D13G024620	K08081	tropinone reductase I [EC:1.1.1.206]
Ghir_D13G024650	K08081	tropinone reductase I [EC:1.1.1.206]
Ghir_D13G024660	K08081	tropinone reductase I [EC:1.1.1.206]
Ghir_D13G024660	K08081	tropinone reductase I [EC:1.1.1.206]
Ghir_A05G009490	K08081	tropinone reductase I [EC:1.1.1.206]
Ghir_A05G009490	K08081	tropinone reductase I [EC:1.1.1.206]
Ghir_A05G009500	K08081	tropinone reductase I [EC:1.1.1.206]
Ghir_A05G009500	K08081	tropinone reductase I [EC:1.1.1.206]
Ghir_A05G036210	K08081	tropinone reductase I [EC:1.1.1.206]
Ghir_A09G016270	K08081	tropinone reductase I [EC:1.1.1.206]
Ghir_A11G009360	K15095	(+)-neomenthol dehydrogenase [EC:1.1.1.208]
Ghir_A12G011350	K15095	(+)-neomenthol dehydrogenase [EC:1.1.1.208]
Ghir_D02G014910	K15095	(+)-neomenthol dehydrogenase [EC:1.1.1.208]
Ghir_D07G012450	K15095	(+)-neomenthol dehydrogenase [EC:1.1.1.208]
Ghir_D07G012450	K15095	(+)-neomenthol dehydrogenase [EC:1.1.1.208]
Ghir_D07G012450	K15095	(+)-neomenthol dehydrogenase [EC:1.1.1.208]
Ghir_D07G012450	K15095	(+)-neomenthol dehydrogenase [EC:1.1.1.208]
Ghir_D07G015470	K15095	(+)-neomenthol dehydrogenase [EC:1.1.1.208]
Ghir_D07G015470	K15095	(+)-neomenthol dehydrogenase [EC:1.1.1.208]
Ghir_D07G015470	K15095	(+)-neomenthol dehydrogenase [EC:1.1.1.208]
Ghir_D07G015480	K15095	(+)-neomenthol dehydrogenase [EC:1.1.1.208]
Ghir_D07G015480	K15095	(+)-neomenthol dehydrogenase [EC:1.1.1.208]
Ghir_D07G015490	K15095	(+)-neomenthol dehydrogenase [EC:1.1.1.208]
Ghir_D07G015490	K15095	(+)-neomenthol dehydrogenase [EC:1.1.1.208]
Ghir_D07G015500	K15095	(+)-neomenthol dehydrogenase [EC:1.1.1.208]
Ghir_D10G021790	K15095	(+)-neomenthol dehydrogenase [EC:1.1.1.208]
Ghir_D10G021810	K15095	(+)-neomenthol dehydrogenase [EC:1.1.1.208]
Ghir_D11G009350	K15095	(+)-neomenthol dehydrogenase [EC:1.1.1.208]
Ghir_D12G011580	K15095	(+)-neomenthol dehydrogenase [EC:1.1.1.208]
Ghir_A07G012300	K15095	(+)-neomenthol dehydrogenase [EC:1.1.1.208]
Ghir_A07G012300	K15095	(+)-neomenthol dehydrogenase [EC:1.1.1.208]
Ghir_A07G015200	K15095	(+)-neomenthol dehydrogenase [EC:1.1.1.208]
Ghir_A07G015210	K15095	(+)-neomenthol dehydrogenase [EC:1.1.1.208]
Ghir_A07G015230	K15095	(+)-neomenthol dehydrogenase [EC:1.1.1.208]
Ghir_A07G015230	K15095	(+)-neomenthol dehydrogenase [EC:1.1.1.208]
Ghir_A07G015240	K15095	(+)-neomenthol dehydrogenase [EC:1.1.1.208]
Ghir_A07G015250	K15095	(+)-neomenthol dehydrogenase [EC:1.1.1.208]
Ghir_A10G020100	K15095	(+)-neomenthol dehydrogenase [EC:1.1.1.208]
Ghir_A12G013990	K10527	enoyl-CoA hydratase/3-hydroxyacyl-CoA dehydrogenase [EC:4.2.1.17 1.1.1.35 1.1.1.211]
Ghir_D06G006830	K10527	enoyl-CoA hydratase/3-hydroxyacyl-CoA dehydrogenase [EC:4.2.1.17 1.1.1.35 1.1.1.211]
Ghir_D06G006830	K10527	enoyl-CoA hydratase/3-hydroxyacyl-CoA dehydrogenase [EC:4.2.1.17 1.1.1.35 1.1.1.211]
Ghir_D06G006830	K10527	enoyl-CoA hydratase/3-hydroxyacyl-CoA dehydrogenase [EC:4.2.1.17 1.1.1.35 1.1.1.211]
Ghir_D06G006830	K10527	enoyl-CoA hydratase/3-hydroxyacyl-CoA dehydrogenase [EC:4.2.1.17 1.1.1.35 1.1.1.211]
Ghir_D07G000650	K10527	enoyl-CoA hydratase/3-hydroxyacyl-CoA dehydrogenase [EC:4.2.1.17 1.1.1.35 1.1.1.211]
Ghir_D07G000650	K10527	enoyl-CoA hydratase/3-hydroxyacyl-CoA dehydrogenase [EC:4.2.1.17 1.1.1.35 1.1.1.211]
Ghir_D08G026300	K10527	enoyl-CoA hydratase/3-hydroxyacyl-CoA dehydrogenase [EC:4.2.1.17 1.1.1.35 1.1.1.211]
Ghir_D08G026300	K10527	enoyl-CoA hydratase/3-hydroxyacyl-CoA dehydrogenase [EC:4.2.1.17 1.1.1.35 1.1.1.211]
Ghir_D09G006740	K10527	enoyl-CoA hydratase/3-hydroxyacyl-CoA dehydrogenase [EC:4.2.1.17 1.1.1.35 1.1.1.211]
Ghir_D09G006740	K10527	enoyl-CoA hydratase/3-hydroxyacyl-CoA dehydrogenase [EC:4.2.1.17 1.1.1.35 1.1.1.211]
Ghir_D09G006740	K10527	enoyl-CoA hydratase/3-hydroxyacyl-CoA dehydrogenase [EC:4.2.1.17 1.1.1.35 1.1.1.211]
Ghir_D09G006740	K10527	enoyl-CoA hydratase/3-hydroxyacyl-CoA dehydrogenase [EC:4.2.1.17 1.1.1.35 1.1.1.211]
Ghir_D10G018310	K10527	enoyl-CoA hydratase/3-hydroxyacyl-CoA dehydrogenase [EC:4.2.1.17 1.1.1.35 1.1.1.211]
Ghir_D10G018310	K10527	enoyl-CoA hydratase/3-hydroxyacyl-CoA dehydrogenase [EC:4.2.1.17 1.1.1.35 1.1.1.211]
Ghir_D12G014100	K10527	enoyl-CoA hydratase/3-hydroxyacyl-CoA dehydrogenase [EC:4.2.1.17 1.1.1.35 1.1.1.211]
Ghir_A06G006720	K10527	enoyl-CoA hydratase/3-hydroxyacyl-CoA dehydrogenase [EC:4.2.1.17 1.1.1.35 1.1.1.211]
Ghir_A07G000530	K10527	enoyl-CoA hydratase/3-hydroxyacyl-CoA dehydrogenase [EC:4.2.1.17 1.1.1.35 1.1.1.211]
Ghir_A08G025400	K10527	enoyl-CoA hydratase/3-hydroxyacyl-CoA dehydrogenase [EC:4.2.1.17 1.1.1.35 1.1.1.211]
Ghir_A09G007030	K10527	enoyl-CoA hydratase/3-hydroxyacyl-CoA dehydrogenase [EC:4.2.1.17 1.1.1.35 1.1.1.211]
Ghir_A09G007030	K10527	enoyl-CoA hydratase/3-hydroxyacyl-CoA dehydrogenase [EC:4.2.1.17 1.1.1.35 1.1.1.211]
Ghir_A09G007030	K10527	enoyl-CoA hydratase/3-hydroxyacyl-CoA dehydrogenase [EC:4.2.1.17 1.1.1.35 1.1.1.211]
Ghir_A09G007030	K10527	enoyl-CoA hydratase/3-hydroxyacyl-CoA dehydrogenase [EC:4.2.1.17 1.1.1.35 1.1.1.211]
Ghir_A09G007030	K10527	enoyl-CoA hydratase/3-hydroxyacyl-CoA dehydrogenase [EC:4.2.1.17 1.1.1.35 1.1.1.211]
Ghir_A09G007030	K10527	enoyl-CoA hydratase/3-hydroxyacyl-CoA dehydrogenase [EC:4.2.1.17 1.1.1.35 1.1.1.211]
Ghir_A10G016860	K10527	enoyl-CoA hydratase/3-hydroxyacyl-CoA dehydrogenase [EC:4.2.1.17 1.1.1.35 1.1.1.211]
Ghir_D05G019650	K13082	bifunctional dihydroflavonol 4-reductase/flavanone 4-reductase [EC:1.1.1.219 1.1.1.234]
Ghir_D06G000680	K13082	bifunctional dihydroflavonol 4-reductase/flavanone 4-reductase [EC:1.1.1.219 1.1.1.234]
Ghir_A05G019640	K13082	bifunctional dihydroflavonol 4-reductase/flavanone 4-reductase [EC:1.1.1.219 1.1.1.234]
Ghir_A06G000790	K13082	bifunctional dihydroflavonol 4-reductase/flavanone 4-reductase [EC:1.1.1.219 1.1.1.234]
Ghir_D05G019650	K13082	bifunctional dihydroflavonol 4-reductase/flavanone 4-reductase [EC:1.1.1.219 1.1.1.234]
Ghir_D06G000680	K13082	bifunctional dihydroflavonol 4-reductase/flavanone 4-reductase [EC:1.1.1.219 1.1.1.234]
Ghir_A05G019640	K13082	bifunctional dihydroflavonol 4-reductase/flavanone 4-reductase [EC:1.1.1.219 1.1.1.234]
Ghir_A06G000790	K13082	bifunctional dihydroflavonol 4-reductase/flavanone 4-reductase [EC:1.1.1.219 1.1.1.234]
Ghir_A11G000090	K00099	1-deoxy-D-xylulose-5-phosphate reductoisomerase [EC:1.1.1.267]
Ghir_A11G000090	K00099	1-deoxy-D-xylulose-5-phosphate reductoisomerase [EC:1.1.1.267]
Ghir_D09G017510	K00099	1-deoxy-D-xylulose-5-phosphate reductoisomerase [EC:1.1.1.267]
Ghir_D09G017510	K00099	1-deoxy-D-xylulose-5-phosphate reductoisomerase [EC:1.1.1.267]
Ghir_D09G017510	K00099	1-deoxy-D-xylulose-5-phosphate reductoisomerase [EC:1.1.1.267]
Ghir_D11G000150	K00099	1-deoxy-D-xylulose-5-phosphate reductoisomerase [EC:1.1.1.267]
Ghir_A09G018050	K00099	1-deoxy-D-xylulose-5-phosphate reductoisomerase [EC:1.1.1.267]
Ghir_D05G001000	K02377	GDP-L-fucose synthase [EC:1.1.1.271]
Ghir_A05G000870	K02377	GDP-L-fucose synthase [EC:1.1.1.271]
Ghir_A01G009620	K00121	S-(hydroxymethyl)glutathione dehydrogenase / alcohol dehydrogenase [EC:1.1.1.284 1.1.1.1]
Ghir_A01G009620	K00121	S-(hydroxymethyl)glutathione dehydrogenase / alcohol dehydrogenase [EC:1.1.1.284 1.1.1.1]
Ghir_A02G014050	K00121	S-(hydroxymethyl)glutathione dehydrogenase / alcohol dehydrogenase [EC:1.1.1.284 1.1.1.1]
Ghir_A02G014050	K00121	S-(hydroxymethyl)glutathione dehydrogenase / alcohol dehydrogenase [EC:1.1.1.284 1.1.1.1]
Ghir_A02G014050	K00121	S-(hydroxymethyl)glutathione dehydrogenase / alcohol dehydrogenase [EC:1.1.1.284 1.1.1.1]
Ghir_D01G010360	K00121	S-(hydroxymethyl)glutathione dehydrogenase / alcohol dehydrogenase [EC:1.1.1.284 1.1.1.1]
Ghir_D03G005550	K00121	S-(hydroxymethyl)glutathione dehydrogenase / alcohol dehydrogenase [EC:1.1.1.284 1.1.1.1]
Ghir_D06G003560	K00121	S-(hydroxymethyl)glutathione dehydrogenase / alcohol dehydrogenase [EC:1.1.1.284 1.1.1.1]
Ghir_D06G009220	K00121	S-(hydroxymethyl)glutathione dehydrogenase / alcohol dehydrogenase [EC:1.1.1.284 1.1.1.1]
Ghir_D07G016650	K00121	S-(hydroxymethyl)glutathione dehydrogenase / alcohol dehydrogenase [EC:1.1.1.284 1.1.1.1]
Ghir_D07G022030	K00121	S-(hydroxymethyl)glutathione dehydrogenase / alcohol dehydrogenase [EC:1.1.1.284 1.1.1.1]
Ghir_D10G024160	K00121	S-(hydroxymethyl)glutathione dehydrogenase / alcohol dehydrogenase [EC:1.1.1.284 1.1.1.1]
Ghir_A06G003520	K00121	S-(hydroxymethyl)glutathione dehydrogenase / alcohol dehydrogenase [EC:1.1.1.284 1.1.1.1]
Ghir_A06G003520	K00121	S-(hydroxymethyl)glutathione dehydrogenase / alcohol dehydrogenase [EC:1.1.1.284 1.1.1.1]
Ghir_A06G003520	K00121	S-(hydroxymethyl)glutathione dehydrogenase / alcohol dehydrogenase [EC:1.1.1.284 1.1.1.1]
Ghir_A06G003520	K00121	S-(hydroxymethyl)glutathione dehydrogenase / alcohol dehydrogenase [EC:1.1.1.284 1.1.1.1]
Ghir_A06G003540	K00121	S-(hydroxymethyl)glutathione dehydrogenase / alcohol dehydrogenase [EC:1.1.1.284 1.1.1.1]
Ghir_A07G016360	K00121	S-(hydroxymethyl)glutathione dehydrogenase / alcohol dehydrogenase [EC:1.1.1.284 1.1.1.1]
Ghir_A07G016360	K00121	S-(hydroxymethyl)glutathione dehydrogenase / alcohol dehydrogenase [EC:1.1.1.284 1.1.1.1]
Ghir_A07G021940	K00121	S-(hydroxymethyl)glutathione dehydrogenase / alcohol dehydrogenase [EC:1.1.1.284 1.1.1.1]
Ghir_A10G022110	K00121	S-(hydroxymethyl)glutathione dehydrogenase / alcohol dehydrogenase [EC:1.1.1.284 1.1.1.1]
Ghir_A01G013610	K22374	3''-deamino-3''-oxonicotianamine reductase [EC:1.1.1.285]
Ghir_A01G013620	K22374	3''-deamino-3''-oxonicotianamine reductase [EC:1.1.1.285]
Ghir_A02G003400	K22374	3''-deamino-3''-oxonicotianamine reductase [EC:1.1.1.285]
Ghir_A02G003410	K22374	3''-deamino-3''-oxonicotianamine reductase [EC:1.1.1.285]
Ghir_A02G003410	K22374	3''-deamino-3''-oxonicotianamine reductase [EC:1.1.1.285]
Ghir_A02G003410	K22374	3''-deamino-3''-oxonicotianamine reductase [EC:1.1.1.285]
Ghir_A02G003410	K22374	3''-deamino-3''-oxonicotianamine reductase [EC:1.1.1.285]
Ghir_D01G014850	K22374	3''-deamino-3''-oxonicotianamine reductase [EC:1.1.1.285]
Ghir_D01G014860	K22374	3''-deamino-3''-oxonicotianamine reductase [EC:1.1.1.285]
Ghir_D01G014870	K22374	3''-deamino-3''-oxonicotianamine reductase [EC:1.1.1.285]
Ghir_D02G003780	K22374	3''-deamino-3''-oxonicotianamine reductase [EC:1.1.1.285]
Ghir_D02G017300	K22374	3''-deamino-3''-oxonicotianamine reductase [EC:1.1.1.285]
Ghir_D02G017300	K22374	3''-deamino-3''-oxonicotianamine reductase [EC:1.1.1.285]
Ghir_D02G017300	K22374	3''-deamino-3''-oxonicotianamine reductase [EC:1.1.1.285]
Ghir_D02G017300	K22374	3''-deamino-3''-oxonicotianamine reductase [EC:1.1.1.285]
Ghir_D02G017310	K22374	3''-deamino-3''-oxonicotianamine reductase [EC:1.1.1.285]
Ghir_D02G017320	K22374	3''-deamino-3''-oxonicotianamine reductase [EC:1.1.1.285]
Ghir_D04G019590	K22374	3''-deamino-3''-oxonicotianamine reductase [EC:1.1.1.285]
Ghir_A03G016030	K22374	3''-deamino-3''-oxonicotianamine reductase [EC:1.1.1.285]
Ghir_A03G016030	K22374	3''-deamino-3''-oxonicotianamine reductase [EC:1.1.1.285]
Ghir_A03G016040	K22374	3''-deamino-3''-oxonicotianamine reductase [EC:1.1.1.285]
Ghir_A03G016050	K22374	3''-deamino-3''-oxonicotianamine reductase [EC:1.1.1.285]
Ghir_A03G016060	K22374	3''-deamino-3''-oxonicotianamine reductase [EC:1.1.1.285]
Ghir_A03G016060	K22374	3''-deamino-3''-oxonicotianamine reductase [EC:1.1.1.285]
Ghir_A04G014900	K22374	3''-deamino-3''-oxonicotianamine reductase [EC:1.1.1.285]
Ghir_A04G014900	K22374	3''-deamino-3''-oxonicotianamine reductase [EC:1.1.1.285]
Ghir_A04G014900	K22374	3''-deamino-3''-oxonicotianamine reductase [EC:1.1.1.285]
Ghir_A13G001200	K09841	xanthoxin dehydrogenase [EC:1.1.1.288]
Ghir_A13G001200	K09841	xanthoxin dehydrogenase [EC:1.1.1.288]
Ghir_D13G001510	K09841	xanthoxin dehydrogenase [EC:1.1.1.288]
Ghir_A09G015150	K09841	xanthoxin dehydrogenase [EC:1.1.1.288]
Ghir_D05G002560	K13606	chlorophyll(ide) b reductase [EC:1.1.1.294]
Ghir_D10G021560	K13606	chlorophyll(ide) b reductase [EC:1.1.1.294]
Ghir_D10G021560	K13606	chlorophyll(ide) b reductase [EC:1.1.1.294]
Ghir_D10G021560	K13606	chlorophyll(ide) b reductase [EC:1.1.1.294]
Ghir_D10G021560	K13606	chlorophyll(ide) b reductase [EC:1.1.1.294]
Ghir_A05G002420	K13606	chlorophyll(ide) b reductase [EC:1.1.1.294]
Ghir_A10G019860	K13606	chlorophyll(ide) b reductase [EC:1.1.1.294]
Ghir_A10G019860	K13606	chlorophyll(ide) b reductase [EC:1.1.1.294]
Ghir_A10G019860	K13606	chlorophyll(ide) b reductase [EC:1.1.1.294]
Ghir_A10G019860	K13606	chlorophyll(ide) b reductase [EC:1.1.1.294]
Ghir_A11G001980	K11153	retinol dehydrogenase 12 [EC:1.1.1.300]
Ghir_D04G012990	K11153	retinol dehydrogenase 12 [EC:1.1.1.300]
Ghir_D04G012990	K11153	retinol dehydrogenase 12 [EC:1.1.1.300]
Ghir_D08G012020	K11153	retinol dehydrogenase 12 [EC:1.1.1.300]
Ghir_D09G016110	K11153	retinol dehydrogenase 12 [EC:1.1.1.300]
Ghir_D09G016110	K11153	retinol dehydrogenase 12 [EC:1.1.1.300]
Ghir_D09G016110	K11153	retinol dehydrogenase 12 [EC:1.1.1.300]
Ghir_D09G016110	K11153	retinol dehydrogenase 12 [EC:1.1.1.300]
Ghir_D09G016110	K11153	retinol dehydrogenase 12 [EC:1.1.1.300]
Ghir_D09G016110	K11153	retinol dehydrogenase 12 [EC:1.1.1.300]
Ghir_D11G001990	K11153	retinol dehydrogenase 12 [EC:1.1.1.300]
Ghir_A04G008870	K11153	retinol dehydrogenase 12 [EC:1.1.1.300]
Ghir_A04G008870	K11153	retinol dehydrogenase 12 [EC:1.1.1.300]
Ghir_A08G011260	K11153	retinol dehydrogenase 12 [EC:1.1.1.300]
Ghir_A09G016630	K11153	retinol dehydrogenase 12 [EC:1.1.1.300]
Ghir_A09G016630	K11153	retinol dehydrogenase 12 [EC:1.1.1.300]
Ghir_A12G003110	K17744	L-galactose dehydrogenase [EC:1.1.1.316]
Ghir_A12G003110	K17744	L-galactose dehydrogenase [EC:1.1.1.316]
Ghir_A12G003110	K17744	L-galactose dehydrogenase [EC:1.1.1.316]
Ghir_D12G004170	K17744	L-galactose dehydrogenase [EC:1.1.1.316]
Ghir_D02G016030	K10251	17beta-estradiol 17-dehydrogenase / very-long-chain 3-oxoacyl-CoA reductase [EC:1.1.1.62 1.1.1.330]
Ghir_D02G016050	K10251	17beta-estradiol 17-dehydrogenase / very-long-chain 3-oxoacyl-CoA reductase [EC:1.1.1.62 1.1.1.330]
Ghir_D03G013670	K10251	17beta-estradiol 17-dehydrogenase / very-long-chain 3-oxoacyl-CoA reductase [EC:1.1.1.62 1.1.1.330]
Ghir_D03G013670	K10251	17beta-estradiol 17-dehydrogenase / very-long-chain 3-oxoacyl-CoA reductase [EC:1.1.1.62 1.1.1.330]
Ghir_D03G013720	K10251	17beta-estradiol 17-dehydrogenase / very-long-chain 3-oxoacyl-CoA reductase [EC:1.1.1.62 1.1.1.330]
Ghir_A03G005030	K10251	17beta-estradiol 17-dehydrogenase / very-long-chain 3-oxoacyl-CoA reductase [EC:1.1.1.62 1.1.1.330]
Ghir_A03G005030	K10251	17beta-estradiol 17-dehydrogenase / very-long-chain 3-oxoacyl-CoA reductase [EC:1.1.1.62 1.1.1.330]
Ghir_A03G005110	K10251	17beta-estradiol 17-dehydrogenase / very-long-chain 3-oxoacyl-CoA reductase [EC:1.1.1.62 1.1.1.330]
Ghir_A03G014620	K10251	17beta-estradiol 17-dehydrogenase / very-long-chain 3-oxoacyl-CoA reductase [EC:1.1.1.62 1.1.1.330]
Ghir_A03G014620	K10251	17beta-estradiol 17-dehydrogenase / very-long-chain 3-oxoacyl-CoA reductase [EC:1.1.1.62 1.1.1.330]
Ghir_A03G014620	K10251	17beta-estradiol 17-dehydrogenase / very-long-chain 3-oxoacyl-CoA reductase [EC:1.1.1.62 1.1.1.330]
Ghir_A03G014630	K10251	17beta-estradiol 17-dehydrogenase / very-long-chain 3-oxoacyl-CoA reductase [EC:1.1.1.62 1.1.1.330]
Ghir_A12G024690	K00033	6-phosphogluconate dehydrogenase [EC:1.1.1.44 1.1.1.343]
Ghir_D07G019350	K00033	6-phosphogluconate dehydrogenase [EC:1.1.1.44 1.1.1.343]
Ghir_D08G005830	K00033	6-phosphogluconate dehydrogenase [EC:1.1.1.44 1.1.1.343]
Ghir_D08G005830	K00033	6-phosphogluconate dehydrogenase [EC:1.1.1.44 1.1.1.343]
Ghir_D08G005830	K00033	6-phosphogluconate dehydrogenase [EC:1.1.1.44 1.1.1.343]
Ghir_D08G005830	K00033	6-phosphogluconate dehydrogenase [EC:1.1.1.44 1.1.1.343]
Ghir_D12G024680	K00033	6-phosphogluconate dehydrogenase [EC:1.1.1.44 1.1.1.343]
Ghir_A04G015720	K00033	6-phosphogluconate dehydrogenase [EC:1.1.1.44 1.1.1.343]
Ghir_A07G019000	K00033	6-phosphogluconate dehydrogenase [EC:1.1.1.44 1.1.1.343]
Ghir_A07G019010	K00033	6-phosphogluconate dehydrogenase [EC:1.1.1.44 1.1.1.343]
Ghir_A08G005690	K00033	6-phosphogluconate dehydrogenase [EC:1.1.1.44 1.1.1.343]
Ghir_A08G005690	K00033	6-phosphogluconate dehydrogenase [EC:1.1.1.44 1.1.1.343]
Ghir_A08G005690	K00033	6-phosphogluconate dehydrogenase [EC:1.1.1.44 1.1.1.343]
Ghir_D05G020620	K15891	NAD+-dependent farnesol dehydrogenase [EC:1.1.1.354]
Ghir_D05G020620	K15891	NAD+-dependent farnesol dehydrogenase [EC:1.1.1.354]
Ghir_A05G020680	K15891	NAD+-dependent farnesol dehydrogenase [EC:1.1.1.354]
Ghir_A01G002300	K00036	glucose-6-phosphate 1-dehydrogenase [EC:1.1.1.49 1.1.1.363]
Ghir_A01G002300	K00036	glucose-6-phosphate 1-dehydrogenase [EC:1.1.1.49 1.1.1.363]
Ghir_A11G015870	K00036	glucose-6-phosphate 1-dehydrogenase [EC:1.1.1.49 1.1.1.363]
Ghir_A11G029770	K00036	glucose-6-phosphate 1-dehydrogenase [EC:1.1.1.49 1.1.1.363]
Ghir_D01G002210	K00036	glucose-6-phosphate 1-dehydrogenase [EC:1.1.1.49 1.1.1.363]
Ghir_D01G002210	K00036	glucose-6-phosphate 1-dehydrogenase [EC:1.1.1.49 1.1.1.363]
Ghir_D02G017920	K00036	glucose-6-phosphate 1-dehydrogenase [EC:1.1.1.49 1.1.1.363]
Ghir_D02G017920	K00036	glucose-6-phosphate 1-dehydrogenase [EC:1.1.1.49 1.1.1.363]
Ghir_D04G008480	K00036	glucose-6-phosphate 1-dehydrogenase [EC:1.1.1.49 1.1.1.363]
Ghir_D04G008480	K00036	glucose-6-phosphate 1-dehydrogenase [EC:1.1.1.49 1.1.1.363]
Ghir_D07G024380	K00036	glucose-6-phosphate 1-dehydrogenase [EC:1.1.1.49 1.1.1.363]
Ghir_D07G024380	K00036	glucose-6-phosphate 1-dehydrogenase [EC:1.1.1.49 1.1.1.363]
Ghir_A03G016620	K00036	glucose-6-phosphate 1-dehydrogenase [EC:1.1.1.49 1.1.1.363]
Ghir_D09G003600	K00036	glucose-6-phosphate 1-dehydrogenase [EC:1.1.1.49 1.1.1.363]
Ghir_D11G015910	K00036	glucose-6-phosphate 1-dehydrogenase [EC:1.1.1.49 1.1.1.363]
Ghir_D11G029940	K00036	glucose-6-phosphate 1-dehydrogenase [EC:1.1.1.49 1.1.1.363]
Ghir_A07G024330	K00036	glucose-6-phosphate 1-dehydrogenase [EC:1.1.1.49 1.1.1.363]
Ghir_A07G024330	K00036	glucose-6-phosphate 1-dehydrogenase [EC:1.1.1.49 1.1.1.363]
Ghir_A09G003680	K00036	glucose-6-phosphate 1-dehydrogenase [EC:1.1.1.49 1.1.1.363]
Ghir_A09G003680	K00036	glucose-6-phosphate 1-dehydrogenase [EC:1.1.1.49 1.1.1.363]
Ghir_A09G003680	K00036	glucose-6-phosphate 1-dehydrogenase [EC:1.1.1.49 1.1.1.363]
Ghir_A09G003680	K00036	glucose-6-phosphate 1-dehydrogenase [EC:1.1.1.49 1.1.1.363]
Ghir_A09G003680	K00036	glucose-6-phosphate 1-dehydrogenase [EC:1.1.1.49 1.1.1.363]
Ghir_A09G003680	K00036	glucose-6-phosphate 1-dehydrogenase [EC:1.1.1.49 1.1.1.363]
Ghir_D02G014240	K19642	D-galacturonate reductase [EC:1.1.1.365]
Ghir_A03G012710	K19642	D-galacturonate reductase [EC:1.1.1.365]
Ghir_A12G002200	K00058	D-3-phosphoglycerate dehydrogenase / 2-oxoglutarate reductase [EC:1.1.1.95 1.1.1.399]
Ghir_A13G004160	K00058	D-3-phosphoglycerate dehydrogenase / 2-oxoglutarate reductase [EC:1.1.1.95 1.1.1.399]
Ghir_D04G017360	K00058	D-3-phosphoglycerate dehydrogenase / 2-oxoglutarate reductase [EC:1.1.1.95 1.1.1.399]
Ghir_D06G001930	K00058	D-3-phosphoglycerate dehydrogenase / 2-oxoglutarate reductase [EC:1.1.1.95 1.1.1.399]
Ghir_D12G002280	K00058	D-3-phosphoglycerate dehydrogenase / 2-oxoglutarate reductase [EC:1.1.1.95 1.1.1.399]
Ghir_D13G004300	K00058	D-3-phosphoglycerate dehydrogenase / 2-oxoglutarate reductase [EC:1.1.1.95 1.1.1.399]
Ghir_A04G012990	K00058	D-3-phosphoglycerate dehydrogenase / 2-oxoglutarate reductase [EC:1.1.1.95 1.1.1.399]
Ghir_A06G002080	K00058	D-3-phosphoglycerate dehydrogenase / 2-oxoglutarate reductase [EC:1.1.1.95 1.1.1.399]
Ghir_D03G016960	K12451	3,5-epimerase/4-reductase [EC:5.1.3.- 1.1.1.-]
Ghir_A03G002020	K12451	3,5-epimerase/4-reductase [EC:5.1.3.- 1.1.1.-]
Ghir_A11G015530	K18121	glyoxylate/succinic semialdehyde reductase [EC:1.1.1.79 1.1.1.-]
Ghir_D07G009740	K18121	glyoxylate/succinic semialdehyde reductase [EC:1.1.1.79 1.1.1.-]
Ghir_D07G009740	K18121	glyoxylate/succinic semialdehyde reductase [EC:1.1.1.79 1.1.1.-]
Ghir_D10G006460	K18121	glyoxylate/succinic semialdehyde reductase [EC:1.1.1.79 1.1.1.-]
Ghir_D11G015560	K18121	glyoxylate/succinic semialdehyde reductase [EC:1.1.1.79 1.1.1.-]
Ghir_D11G015560	K18121	glyoxylate/succinic semialdehyde reductase [EC:1.1.1.79 1.1.1.-]
Ghir_A07G009660	K18121	glyoxylate/succinic semialdehyde reductase [EC:1.1.1.79 1.1.1.-]
Ghir_A07G009660	K18121	glyoxylate/succinic semialdehyde reductase [EC:1.1.1.79 1.1.1.-]
Ghir_A10G005620	K18121	glyoxylate/succinic semialdehyde reductase [EC:1.1.1.79 1.1.1.-]
Ghir_D03G012440	K22418	11beta/17beta-hydroxysteroid dehydrogenase [EC:1.1.1.146 1.1.1.-]
Ghir_D05G024170	K22418	11beta/17beta-hydroxysteroid dehydrogenase [EC:1.1.1.146 1.1.1.-]
Ghir_D07G005540	K22418	11beta/17beta-hydroxysteroid dehydrogenase [EC:1.1.1.146 1.1.1.-]
Ghir_D07G005550	K22418	11beta/17beta-hydroxysteroid dehydrogenase [EC:1.1.1.146 1.1.1.-]
Ghir_A03G006410	K22418	11beta/17beta-hydroxysteroid dehydrogenase [EC:1.1.1.146 1.1.1.-]
Ghir_A03G006410	K22418	11beta/17beta-hydroxysteroid dehydrogenase [EC:1.1.1.146 1.1.1.-]
Ghir_A05G024330	K22418	11beta/17beta-hydroxysteroid dehydrogenase [EC:1.1.1.146 1.1.1.-]
Ghir_A07G005530	K22418	11beta/17beta-hydroxysteroid dehydrogenase [EC:1.1.1.146 1.1.1.-]
Ghir_A09G026230	K22418	11beta/17beta-hydroxysteroid dehydrogenase [EC:1.1.1.146 1.1.1.-]
Ghir_A09G026230	K22418	11beta/17beta-hydroxysteroid dehydrogenase [EC:1.1.1.146 1.1.1.-]
Ghir_A09G026230	K22418	11beta/17beta-hydroxysteroid dehydrogenase [EC:1.1.1.146 1.1.1.-]
Ghir_A09G026230	K22418	11beta/17beta-hydroxysteroid dehydrogenase [EC:1.1.1.146 1.1.1.-]
Ghir_A09G026230	K22418	11beta/17beta-hydroxysteroid dehydrogenase [EC:1.1.1.146 1.1.1.-]
Ghir_A09G026230	K22418	11beta/17beta-hydroxysteroid dehydrogenase [EC:1.1.1.146 1.1.1.-]
Ghir_A09G026230	K22418	11beta/17beta-hydroxysteroid dehydrogenase [EC:1.1.1.146 1.1.1.-]
Ghir_A09G026230	K22418	11beta/17beta-hydroxysteroid dehydrogenase [EC:1.1.1.146 1.1.1.-]
Ghir_A09G026230	K22418	11beta/17beta-hydroxysteroid dehydrogenase [EC:1.1.1.146 1.1.1.-]
Ghir_D02G012480	K00102	D-lactate dehydrogenase (cytochrome) [EC:1.1.2.4]
Ghir_D09G013550	K00102	D-lactate dehydrogenase (cytochrome) [EC:1.1.2.4]
Ghir_D09G013550	K00102	D-lactate dehydrogenase (cytochrome) [EC:1.1.2.4]
Ghir_A09G014090	K00102	D-lactate dehydrogenase (cytochrome) [EC:1.1.2.4]
Ghir_A09G014090	K00102	D-lactate dehydrogenase (cytochrome) [EC:1.1.2.4]
Ghir_A09G014090	K00102	D-lactate dehydrogenase (cytochrome) [EC:1.1.2.4]
Ghir_A12G012460	K00103	L-gulonolactone oxidase [EC:1.1.3.8]
Ghir_A12G012470	K00103	L-gulonolactone oxidase [EC:1.1.3.8]
Ghir_A12G012480	K00103	L-gulonolactone oxidase [EC:1.1.3.8]
Ghir_A12G012490	K00103	L-gulonolactone oxidase [EC:1.1.3.8]
Ghir_A12G012510	K00103	L-gulonolactone oxidase [EC:1.1.3.8]
Ghir_D07G002720	K00103	L-gulonolactone oxidase [EC:1.1.3.8]
Ghir_D07G002720	K00103	L-gulonolactone oxidase [EC:1.1.3.8]
Ghir_D07G002720	K00103	L-gulonolactone oxidase [EC:1.1.3.8]
Ghir_D12G012690	K00103	L-gulonolactone oxidase [EC:1.1.3.8]
Ghir_D12G012710	K00103	L-gulonolactone oxidase [EC:1.1.3.8]
Ghir_A07G002730	K00103	L-gulonolactone oxidase [EC:1.1.3.8]
Ghir_A01G003560	K11517	(S)-2-hydroxy-acid oxidase [EC:1.1.3.15]
Ghir_A01G003560	K11517	(S)-2-hydroxy-acid oxidase [EC:1.1.3.15]
Ghir_A01G003560	K11517	(S)-2-hydroxy-acid oxidase [EC:1.1.3.15]
Ghir_A01G003570	K11517	(S)-2-hydroxy-acid oxidase [EC:1.1.3.15]
Ghir_A01G003570	K11517	(S)-2-hydroxy-acid oxidase [EC:1.1.3.15]
Ghir_A11G020580	K11517	(S)-2-hydroxy-acid oxidase [EC:1.1.3.15]
Ghir_D01G003580	K11517	(S)-2-hydroxy-acid oxidase [EC:1.1.3.15]
Ghir_D01G003590	K11517	(S)-2-hydroxy-acid oxidase [EC:1.1.3.15]
Ghir_D02G013850	K11517	(S)-2-hydroxy-acid oxidase [EC:1.1.3.15]
Ghir_D03G007660	K11517	(S)-2-hydroxy-acid oxidase [EC:1.1.3.15]
Ghir_D03G012330	K11517	(S)-2-hydroxy-acid oxidase [EC:1.1.3.15]
Ghir_D05G015020	K11517	(S)-2-hydroxy-acid oxidase [EC:1.1.3.15]
Ghir_D05G015020	K11517	(S)-2-hydroxy-acid oxidase [EC:1.1.3.15]
Ghir_D06G016260	K11517	(S)-2-hydroxy-acid oxidase [EC:1.1.3.15]
Ghir_D06G016270	K11517	(S)-2-hydroxy-acid oxidase [EC:1.1.3.15]
Ghir_D06G016280	K11517	(S)-2-hydroxy-acid oxidase [EC:1.1.3.15]
Ghir_D09G008230	K11517	(S)-2-hydroxy-acid oxidase [EC:1.1.3.15]
Ghir_D09G008230	K11517	(S)-2-hydroxy-acid oxidase [EC:1.1.3.15]
Ghir_D09G008230	K11517	(S)-2-hydroxy-acid oxidase [EC:1.1.3.15]
Ghir_D09G008230	K11517	(S)-2-hydroxy-acid oxidase [EC:1.1.3.15]
Ghir_D10G006190	K11517	(S)-2-hydroxy-acid oxidase [EC:1.1.3.15]
Ghir_D10G006210	K11517	(S)-2-hydroxy-acid oxidase [EC:1.1.3.15]
Ghir_D10G006210	K11517	(S)-2-hydroxy-acid oxidase [EC:1.1.3.15]
Ghir_D10G006210	K11517	(S)-2-hydroxy-acid oxidase [EC:1.1.3.15]
Ghir_D10G006210	K11517	(S)-2-hydroxy-acid oxidase [EC:1.1.3.15]
Ghir_D10G006210	K11517	(S)-2-hydroxy-acid oxidase [EC:1.1.3.15]
Ghir_D10G006210	K11517	(S)-2-hydroxy-acid oxidase [EC:1.1.3.15]
Ghir_D11G018710	K11517	(S)-2-hydroxy-acid oxidase [EC:1.1.3.15]
Ghir_D13G006450	K11517	(S)-2-hydroxy-acid oxidase [EC:1.1.3.15]
Ghir_D13G006450	K11517	(S)-2-hydroxy-acid oxidase [EC:1.1.3.15]
Ghir_D13G006450	K11517	(S)-2-hydroxy-acid oxidase [EC:1.1.3.15]
Ghir_D13G006450	K11517	(S)-2-hydroxy-acid oxidase [EC:1.1.3.15]
Ghir_D13G006450	K11517	(S)-2-hydroxy-acid oxidase [EC:1.1.3.15]
Ghir_A05G015180	K11517	(S)-2-hydroxy-acid oxidase [EC:1.1.3.15]
Ghir_A05G015180	K11517	(S)-2-hydroxy-acid oxidase [EC:1.1.3.15]
Ghir_A05G015180	K11517	(S)-2-hydroxy-acid oxidase [EC:1.1.3.15]
Ghir_A05G015180	K11517	(S)-2-hydroxy-acid oxidase [EC:1.1.3.15]
Ghir_A05G015180	K11517	(S)-2-hydroxy-acid oxidase [EC:1.1.3.15]
Ghir_A05G015180	K11517	(S)-2-hydroxy-acid oxidase [EC:1.1.3.15]
Ghir_A05G015180	K11517	(S)-2-hydroxy-acid oxidase [EC:1.1.3.15]
Ghir_A05G015180	K11517	(S)-2-hydroxy-acid oxidase [EC:1.1.3.15]
Ghir_A06G011140	K11517	(S)-2-hydroxy-acid oxidase [EC:1.1.3.15]
Ghir_A06G015440	K11517	(S)-2-hydroxy-acid oxidase [EC:1.1.3.15]
Ghir_A06G015440	K11517	(S)-2-hydroxy-acid oxidase [EC:1.1.3.15]
Ghir_A06G015440	K11517	(S)-2-hydroxy-acid oxidase [EC:1.1.3.15]
Ghir_A06G015440	K11517	(S)-2-hydroxy-acid oxidase [EC:1.1.3.15]
Ghir_A06G015440	K11517	(S)-2-hydroxy-acid oxidase [EC:1.1.3.15]
Ghir_A09G008520	K11517	(S)-2-hydroxy-acid oxidase [EC:1.1.3.15]
Ghir_A09G008520	K11517	(S)-2-hydroxy-acid oxidase [EC:1.1.3.15]
Ghir_A09G008520	K11517	(S)-2-hydroxy-acid oxidase [EC:1.1.3.15]
Ghir_A09G008520	K11517	(S)-2-hydroxy-acid oxidase [EC:1.1.3.15]
Ghir_A09G008520	K11517	(S)-2-hydroxy-acid oxidase [EC:1.1.3.15]
Ghir_A10G005350	K11517	(S)-2-hydroxy-acid oxidase [EC:1.1.3.15]
Ghir_A10G005350	K11517	(S)-2-hydroxy-acid oxidase [EC:1.1.3.15]
Ghir_A10G005350	K11517	(S)-2-hydroxy-acid oxidase [EC:1.1.3.15]
Ghir_A10G005350	K11517	(S)-2-hydroxy-acid oxidase [EC:1.1.3.15]
Ghir_A10G005370	K11517	(S)-2-hydroxy-acid oxidase [EC:1.1.3.15]
Ghir_D07G016370	K17756	long-chain-alcohol oxidase [EC:1.1.3.20]
Ghir_D07G016370	K17756	long-chain-alcohol oxidase [EC:1.1.3.20]
Ghir_D07G016370	K17756	long-chain-alcohol oxidase [EC:1.1.3.20]
Ghir_D09G023470	K17756	long-chain-alcohol oxidase [EC:1.1.3.20]
Ghir_D10G016820	K17756	long-chain-alcohol oxidase [EC:1.1.3.20]
Ghir_D10G016820	K17756	long-chain-alcohol oxidase [EC:1.1.3.20]
Ghir_D10G016820	K17756	long-chain-alcohol oxidase [EC:1.1.3.20]
Ghir_A07G016070	K17756	long-chain-alcohol oxidase [EC:1.1.3.20]
Ghir_A09G024330	K17756	long-chain-alcohol oxidase [EC:1.1.3.20]
Ghir_A08G026420	K17756	long-chain-alcohol oxidase [EC:1.1.3.20]
Ghir_Scaffold2302G000010	K17756	long-chain-alcohol oxidase [EC:1.1.3.20]
Ghir_Scaffold2302G000010	K17756	long-chain-alcohol oxidase [EC:1.1.3.20]
Ghir_Scaffold2302G000010	K17756	long-chain-alcohol oxidase [EC:1.1.3.20]
Ghir_Scaffold2302G000010	K17756	long-chain-alcohol oxidase [EC:1.1.3.20]
Ghir_Scaffold2302G000010	K17756	long-chain-alcohol oxidase [EC:1.1.3.20]
Ghir_A10G024880	K17756	long-chain-alcohol oxidase [EC:1.1.3.20]
Ghir_A10G024880	K17756	long-chain-alcohol oxidase [EC:1.1.3.20]
Ghir_A10G024880	K17756	long-chain-alcohol oxidase [EC:1.1.3.20]
Ghir_D04G000540	K00111	glycerol-3-phosphate dehydrogenase [EC:1.1.5.3]
Ghir_D04G000540	K00111	glycerol-3-phosphate dehydrogenase [EC:1.1.5.3]
Ghir_D04G000540	K00111	glycerol-3-phosphate dehydrogenase [EC:1.1.5.3]
Ghir_D06G019230	K00111	glycerol-3-phosphate dehydrogenase [EC:1.1.5.3]
Ghir_A05G042390	K00111	glycerol-3-phosphate dehydrogenase [EC:1.1.5.3]
Ghir_A05G042390	K00111	glycerol-3-phosphate dehydrogenase [EC:1.1.5.3]
Ghir_A05G042390	K00111	glycerol-3-phosphate dehydrogenase [EC:1.1.5.3]
Ghir_A05G042390	K00111	glycerol-3-phosphate dehydrogenase [EC:1.1.5.3]
Ghir_A06G018380	K00111	glycerol-3-phosphate dehydrogenase [EC:1.1.5.3]
Ghir_A06G018380	K00111	glycerol-3-phosphate dehydrogenase [EC:1.1.5.3]
Ghir_D10G009730	K18204	D-2-hydroxyglutarate dehydrogenase [EC:1.1.99.39]
Ghir_A10G009520	K18204	D-2-hydroxyglutarate dehydrogenase [EC:1.1.99.39]
Ghir_A10G009520	K18204	D-2-hydroxyglutarate dehydrogenase [EC:1.1.99.39]
Ghir_D05G017780	K11147	dehydrogenase/reductase SDR family member 4 [EC:1.1.-.-]
Ghir_D10G001300	K11147	dehydrogenase/reductase SDR family member 4 [EC:1.1.-.-]
Ghir_D10G001310	K11147	dehydrogenase/reductase SDR family member 4 [EC:1.1.-.-]
Ghir_A05G017790	K11147	dehydrogenase/reductase SDR family member 4 [EC:1.1.-.-]
Ghir_A10G000550	K11147	dehydrogenase/reductase SDR family member 4 [EC:1.1.-.-]
Ghir_A10G000550	K11147	dehydrogenase/reductase SDR family member 4 [EC:1.1.-.-]
Ghir_A10G000560	K11147	dehydrogenase/reductase SDR family member 4 [EC:1.1.-.-]
Ghir_A13G009190	K11165	dehydrogenase/reductase SDR family member 7 [EC:1.1.-.-]
Ghir_A13G009190	K11165	dehydrogenase/reductase SDR family member 7 [EC:1.1.-.-]
Ghir_A13G009190	K11165	dehydrogenase/reductase SDR family member 7 [EC:1.1.-.-]
Ghir_A13G009190	K11165	dehydrogenase/reductase SDR family member 7 [EC:1.1.-.-]
Ghir_A13G009190	K11165	dehydrogenase/reductase SDR family member 7 [EC:1.1.-.-]
Ghir_A13G009190	K11165	dehydrogenase/reductase SDR family member 7 [EC:1.1.-.-]
Ghir_A13G009190	K11165	dehydrogenase/reductase SDR family member 7 [EC:1.1.-.-]
Ghir_A13G009190	K11165	dehydrogenase/reductase SDR family member 7 [EC:1.1.-.-]
Ghir_D13G009780	K11165	dehydrogenase/reductase SDR family member 7 [EC:1.1.-.-]
Ghir_D13G009780	K11165	dehydrogenase/reductase SDR family member 7 [EC:1.1.-.-]
Ghir_D06G012540	K11168	dehydrogenase/reductase SDR family member 12 [EC:1.1.-.-]
Ghir_D06G012540	K11168	dehydrogenase/reductase SDR family member 12 [EC:1.1.-.-]
Ghir_A06G012020	K11168	dehydrogenase/reductase SDR family member 12 [EC:1.1.-.-]
Ghir_A06G012020	K11168	dehydrogenase/reductase SDR family member 12 [EC:1.1.-.-]
Ghir_D05G013750	K15403	fatty acid omega-hydroxy dehydrogenase [EC:1.1.-.-]
Ghir_D10G006370	K15403	fatty acid omega-hydroxy dehydrogenase [EC:1.1.-.-]
Ghir_A05G014000	K15403	fatty acid omega-hydroxy dehydrogenase [EC:1.1.-.-]
Ghir_A10G005540	K15403	fatty acid omega-hydroxy dehydrogenase [EC:1.1.-.-]
Ghir_A10G005540	K15403	fatty acid omega-hydroxy dehydrogenase [EC:1.1.-.-]
Ghir_A02G007640	K00128	aldehyde dehydrogenase (NAD+) [EC:1.2.1.3]
Ghir_A02G007640	K00128	aldehyde dehydrogenase (NAD+) [EC:1.2.1.3]
Ghir_A02G007640	K00128	aldehyde dehydrogenase (NAD+) [EC:1.2.1.3]
Ghir_A02G007640	K00128	aldehyde dehydrogenase (NAD+) [EC:1.2.1.3]
Ghir_A02G018490	K00128	aldehyde dehydrogenase (NAD+) [EC:1.2.1.3]
Ghir_A12G015390	K00128	aldehyde dehydrogenase (NAD+) [EC:1.2.1.3]
Ghir_A12G015390	K00128	aldehyde dehydrogenase (NAD+) [EC:1.2.1.3]
Ghir_A12G015390	K00128	aldehyde dehydrogenase (NAD+) [EC:1.2.1.3]
Ghir_A12G028630	K00128	aldehyde dehydrogenase (NAD+) [EC:1.2.1.3]
Ghir_D02G008080	K00128	aldehyde dehydrogenase (NAD+) [EC:1.2.1.3]
Ghir_D02G016990	K00128	aldehyde dehydrogenase (NAD+) [EC:1.2.1.3]
Ghir_D02G016990	K00128	aldehyde dehydrogenase (NAD+) [EC:1.2.1.3]
Ghir_D03G001130	K00128	aldehyde dehydrogenase (NAD+) [EC:1.2.1.3]
Ghir_D03G001130	K00128	aldehyde dehydrogenase (NAD+) [EC:1.2.1.3]
Ghir_D03G001130	K00128	aldehyde dehydrogenase (NAD+) [EC:1.2.1.3]
Ghir_D03G001130	K00128	aldehyde dehydrogenase (NAD+) [EC:1.2.1.3]
Ghir_D04G003640	K00128	aldehyde dehydrogenase (NAD+) [EC:1.2.1.3]
Ghir_D04G003640	K00128	aldehyde dehydrogenase (NAD+) [EC:1.2.1.3]
Ghir_D05G007240	K00128	aldehyde dehydrogenase (NAD+) [EC:1.2.1.3]
Ghir_D05G007240	K00128	aldehyde dehydrogenase (NAD+) [EC:1.2.1.3]
Ghir_D05G023990	K00128	aldehyde dehydrogenase (NAD+) [EC:1.2.1.3]
Ghir_D05G023990	K00128	aldehyde dehydrogenase (NAD+) [EC:1.2.1.3]
Ghir_D05G023990	K00128	aldehyde dehydrogenase (NAD+) [EC:1.2.1.3]
Ghir_D06G004820	K00128	aldehyde dehydrogenase (NAD+) [EC:1.2.1.3]
Ghir_D06G004820	K00128	aldehyde dehydrogenase (NAD+) [EC:1.2.1.3]
Ghir_D07G023700	K00128	aldehyde dehydrogenase (NAD+) [EC:1.2.1.3]
Ghir_D07G023700	K00128	aldehyde dehydrogenase (NAD+) [EC:1.2.1.3]
Ghir_A03G015680	K00128	aldehyde dehydrogenase (NAD+) [EC:1.2.1.3]
Ghir_D12G015670	K00128	aldehyde dehydrogenase (NAD+) [EC:1.2.1.3]
Ghir_D12G015670	K00128	aldehyde dehydrogenase (NAD+) [EC:1.2.1.3]
Ghir_D12G028780	K00128	aldehyde dehydrogenase (NAD+) [EC:1.2.1.3]
Ghir_A05G007160	K00128	aldehyde dehydrogenase (NAD+) [EC:1.2.1.3]
Ghir_A05G007160	K00128	aldehyde dehydrogenase (NAD+) [EC:1.2.1.3]
Ghir_A05G024130	K00128	aldehyde dehydrogenase (NAD+) [EC:1.2.1.3]
Ghir_A05G039490	K00128	aldehyde dehydrogenase (NAD+) [EC:1.2.1.3]
Ghir_A06G004770	K00128	aldehyde dehydrogenase (NAD+) [EC:1.2.1.3]
Ghir_A07G023600	K00128	aldehyde dehydrogenase (NAD+) [EC:1.2.1.3]
Ghir_D06G016320	K14085	aldehyde dehydrogenase family 7 member A1 [EC:1.2.1.31 1.2.1.8 1.2.1.3]
Ghir_D06G016320	K14085	aldehyde dehydrogenase family 7 member A1 [EC:1.2.1.31 1.2.1.8 1.2.1.3]
Ghir_D06G016320	K14085	aldehyde dehydrogenase family 7 member A1 [EC:1.2.1.31 1.2.1.8 1.2.1.3]
Ghir_D06G016320	K14085	aldehyde dehydrogenase family 7 member A1 [EC:1.2.1.31 1.2.1.8 1.2.1.3]
Ghir_A06G015530	K14085	aldehyde dehydrogenase family 7 member A1 [EC:1.2.1.31 1.2.1.8 1.2.1.3]
Ghir_A11G004640	K00130	betaine-aldehyde dehydrogenase [EC:1.2.1.8]
Ghir_A11G004640	K00130	betaine-aldehyde dehydrogenase [EC:1.2.1.8]
Ghir_A11G004640	K00130	betaine-aldehyde dehydrogenase [EC:1.2.1.8]
Ghir_D07G006910	K00130	betaine-aldehyde dehydrogenase [EC:1.2.1.8]
Ghir_D11G004530	K00130	betaine-aldehyde dehydrogenase [EC:1.2.1.8]
Ghir_D11G004530	K00130	betaine-aldehyde dehydrogenase [EC:1.2.1.8]
Ghir_D11G004530	K00130	betaine-aldehyde dehydrogenase [EC:1.2.1.8]
Ghir_D11G004530	K00130	betaine-aldehyde dehydrogenase [EC:1.2.1.8]
Ghir_A07G006940	K00130	betaine-aldehyde dehydrogenase [EC:1.2.1.8]
Ghir_A07G006940	K00130	betaine-aldehyde dehydrogenase [EC:1.2.1.8]
Ghir_D06G016320	K14085	aldehyde dehydrogenase family 7 member A1 [EC:1.2.1.31 1.2.1.8 1.2.1.3]
Ghir_D06G016320	K14085	aldehyde dehydrogenase family 7 member A1 [EC:1.2.1.31 1.2.1.8 1.2.1.3]
Ghir_D06G016320	K14085	aldehyde dehydrogenase family 7 member A1 [EC:1.2.1.31 1.2.1.8 1.2.1.3]
Ghir_D06G016320	K14085	aldehyde dehydrogenase family 7 member A1 [EC:1.2.1.31 1.2.1.8 1.2.1.3]
Ghir_A06G015530	K14085	aldehyde dehydrogenase family 7 member A1 [EC:1.2.1.31 1.2.1.8 1.2.1.3]
Ghir_D05G005480	K00131	glyceraldehyde-3-phosphate dehydrogenase (NADP+) [EC:1.2.1.9]
Ghir_D05G006140	K00131	glyceraldehyde-3-phosphate dehydrogenase (NADP+) [EC:1.2.1.9]
Ghir_D05G006140	K00131	glyceraldehyde-3-phosphate dehydrogenase (NADP+) [EC:1.2.1.9]
Ghir_D07G003120	K00131	glyceraldehyde-3-phosphate dehydrogenase (NADP+) [EC:1.2.1.9]
Ghir_A05G005410	K00131	glyceraldehyde-3-phosphate dehydrogenase (NADP+) [EC:1.2.1.9]
Ghir_A05G006080	K00131	glyceraldehyde-3-phosphate dehydrogenase (NADP+) [EC:1.2.1.9]
Ghir_A05G006080	K00131	glyceraldehyde-3-phosphate dehydrogenase (NADP+) [EC:1.2.1.9]
Ghir_A07G003120	K00131	glyceraldehyde-3-phosphate dehydrogenase (NADP+) [EC:1.2.1.9]
Ghir_A12G016570	K00133	aspartate-semialdehyde dehydrogenase [EC:1.2.1.11]
Ghir_A13G002460	K00133	aspartate-semialdehyde dehydrogenase [EC:1.2.1.11]
Ghir_D12G016810	K00133	aspartate-semialdehyde dehydrogenase [EC:1.2.1.11]
Ghir_D13G002750	K00133	aspartate-semialdehyde dehydrogenase [EC:1.2.1.11]
Ghir_A01G008950	K00134	glyceraldehyde 3-phosphate dehydrogenase [EC:1.2.1.12]
Ghir_A01G008950	K00134	glyceraldehyde 3-phosphate dehydrogenase [EC:1.2.1.12]
Ghir_A11G004090	K00134	glyceraldehyde 3-phosphate dehydrogenase [EC:1.2.1.12]
Ghir_A11G007150	K00134	glyceraldehyde 3-phosphate dehydrogenase [EC:1.2.1.12]
Ghir_A11G031920	K00134	glyceraldehyde 3-phosphate dehydrogenase [EC:1.2.1.12]
Ghir_A13G013130	K00134	glyceraldehyde 3-phosphate dehydrogenase [EC:1.2.1.12]
Ghir_D02G015800	K00134	glyceraldehyde 3-phosphate dehydrogenase [EC:1.2.1.12]
Ghir_D04G008460	K00134	glyceraldehyde 3-phosphate dehydrogenase [EC:1.2.1.12]
Ghir_D04G008460	K00134	glyceraldehyde 3-phosphate dehydrogenase [EC:1.2.1.12]
Ghir_D07G024400	K00134	glyceraldehyde 3-phosphate dehydrogenase [EC:1.2.1.12]
Ghir_D07G024400	K00134	glyceraldehyde 3-phosphate dehydrogenase [EC:1.2.1.12]
Ghir_D07G024400	K00134	glyceraldehyde 3-phosphate dehydrogenase [EC:1.2.1.12]
Ghir_A03G014410	K00134	glyceraldehyde 3-phosphate dehydrogenase [EC:1.2.1.12]
Ghir_A03G014410	K00134	glyceraldehyde 3-phosphate dehydrogenase [EC:1.2.1.12]
Ghir_A03G014410	K00134	glyceraldehyde 3-phosphate dehydrogenase [EC:1.2.1.12]
Ghir_A03G014420	K00134	glyceraldehyde 3-phosphate dehydrogenase [EC:1.2.1.12]
Ghir_A03G014430	K00134	glyceraldehyde 3-phosphate dehydrogenase [EC:1.2.1.12]
Ghir_D09G003620	K00134	glyceraldehyde 3-phosphate dehydrogenase [EC:1.2.1.12]
Ghir_D11G004030	K00134	glyceraldehyde 3-phosphate dehydrogenase [EC:1.2.1.12]
Ghir_D11G007100	K00134	glyceraldehyde 3-phosphate dehydrogenase [EC:1.2.1.12]
Ghir_D11G032310	K00134	glyceraldehyde 3-phosphate dehydrogenase [EC:1.2.1.12]
Ghir_D13G013840	K00134	glyceraldehyde 3-phosphate dehydrogenase [EC:1.2.1.12]
Ghir_A05G035300	K00134	glyceraldehyde 3-phosphate dehydrogenase [EC:1.2.1.12]
Ghir_A07G024350	K00134	glyceraldehyde 3-phosphate dehydrogenase [EC:1.2.1.12]
Ghir_A07G024350	K00134	glyceraldehyde 3-phosphate dehydrogenase [EC:1.2.1.12]
Ghir_A09G003700	K00134	glyceraldehyde 3-phosphate dehydrogenase [EC:1.2.1.12]
Ghir_A01G009430	K05298	glyceraldehyde-3-phosphate dehydrogenase (NADP+) (phosphorylating) [EC:1.2.1.13]
Ghir_D01G009850	K05298	glyceraldehyde-3-phosphate dehydrogenase (NADP+) (phosphorylating) [EC:1.2.1.13]
Ghir_D05G018230	K05298	glyceraldehyde-3-phosphate dehydrogenase (NADP+) (phosphorylating) [EC:1.2.1.13]
Ghir_D07G025130	K05298	glyceraldehyde-3-phosphate dehydrogenase (NADP+) (phosphorylating) [EC:1.2.1.13]
Ghir_D10G008680	K05298	glyceraldehyde-3-phosphate dehydrogenase (NADP+) (phosphorylating) [EC:1.2.1.13]
Ghir_A05G018220	K05298	glyceraldehyde-3-phosphate dehydrogenase (NADP+) (phosphorylating) [EC:1.2.1.13]
Ghir_A07G025060	K05298	glyceraldehyde-3-phosphate dehydrogenase (NADP+) (phosphorylating) [EC:1.2.1.13]
Ghir_A10G006690	K05298	glyceraldehyde-3-phosphate dehydrogenase (NADP+) (phosphorylating) [EC:1.2.1.13]
Ghir_A13G004890	K00140	malonate-semialdehyde dehydrogenase (acetylating) / methylmalonate-semialdehyde dehydrogenase [EC:1.2.1.18 1.2.1.27]
Ghir_D02G021010	K00140	malonate-semialdehyde dehydrogenase (acetylating) / methylmalonate-semialdehyde dehydrogenase [EC:1.2.1.18 1.2.1.27]
Ghir_D02G021020	K00140	malonate-semialdehyde dehydrogenase (acetylating) / methylmalonate-semialdehyde dehydrogenase [EC:1.2.1.18 1.2.1.27]
Ghir_A03G019620	K00140	malonate-semialdehyde dehydrogenase (acetylating) / methylmalonate-semialdehyde dehydrogenase [EC:1.2.1.18 1.2.1.27]
Ghir_A03G019630	K00140	malonate-semialdehyde dehydrogenase (acetylating) / methylmalonate-semialdehyde dehydrogenase [EC:1.2.1.18 1.2.1.27]
Ghir_D10G010620	K00140	malonate-semialdehyde dehydrogenase (acetylating) / methylmalonate-semialdehyde dehydrogenase [EC:1.2.1.18 1.2.1.27]
Ghir_D10G010620	K00140	malonate-semialdehyde dehydrogenase (acetylating) / methylmalonate-semialdehyde dehydrogenase [EC:1.2.1.18 1.2.1.27]
Ghir_D12G006150	K00140	malonate-semialdehyde dehydrogenase (acetylating) / methylmalonate-semialdehyde dehydrogenase [EC:1.2.1.18 1.2.1.27]
Ghir_A10G008670	K00140	malonate-semialdehyde dehydrogenase (acetylating) / methylmalonate-semialdehyde dehydrogenase [EC:1.2.1.18 1.2.1.27]
Ghir_A01G009130	K17761	succinate-semialdehyde dehydrogenase, mitochondrial [EC:1.2.1.24]
Ghir_D01G009520	K17761	succinate-semialdehyde dehydrogenase, mitochondrial [EC:1.2.1.24]
Ghir_Scaffold1501G000020	K17761	succinate-semialdehyde dehydrogenase, mitochondrial [EC:1.2.1.24]
Ghir_A13G004890	K00140	malonate-semialdehyde dehydrogenase (acetylating) / methylmalonate-semialdehyde dehydrogenase [EC:1.2.1.18 1.2.1.27]
Ghir_D02G021010	K00140	malonate-semialdehyde dehydrogenase (acetylating) / methylmalonate-semialdehyde dehydrogenase [EC:1.2.1.18 1.2.1.27]
Ghir_D02G021020	K00140	malonate-semialdehyde dehydrogenase (acetylating) / methylmalonate-semialdehyde dehydrogenase [EC:1.2.1.18 1.2.1.27]
Ghir_A03G019620	K00140	malonate-semialdehyde dehydrogenase (acetylating) / methylmalonate-semialdehyde dehydrogenase [EC:1.2.1.18 1.2.1.27]
Ghir_A03G019630	K00140	malonate-semialdehyde dehydrogenase (acetylating) / methylmalonate-semialdehyde dehydrogenase [EC:1.2.1.18 1.2.1.27]
Ghir_D10G010620	K00140	malonate-semialdehyde dehydrogenase (acetylating) / methylmalonate-semialdehyde dehydrogenase [EC:1.2.1.18 1.2.1.27]
Ghir_D10G010620	K00140	malonate-semialdehyde dehydrogenase (acetylating) / methylmalonate-semialdehyde dehydrogenase [EC:1.2.1.18 1.2.1.27]
Ghir_D12G006150	K00140	malonate-semialdehyde dehydrogenase (acetylating) / methylmalonate-semialdehyde dehydrogenase [EC:1.2.1.18 1.2.1.27]
Ghir_A10G008670	K00140	malonate-semialdehyde dehydrogenase (acetylating) / methylmalonate-semialdehyde dehydrogenase [EC:1.2.1.18 1.2.1.27]
Ghir_D06G016320	K14085	aldehyde dehydrogenase family 7 member A1 [EC:1.2.1.31 1.2.1.8 1.2.1.3]
Ghir_D06G016320	K14085	aldehyde dehydrogenase family 7 member A1 [EC:1.2.1.31 1.2.1.8 1.2.1.3]
Ghir_D06G016320	K14085	aldehyde dehydrogenase family 7 member A1 [EC:1.2.1.31 1.2.1.8 1.2.1.3]
Ghir_D06G016320	K14085	aldehyde dehydrogenase family 7 member A1 [EC:1.2.1.31 1.2.1.8 1.2.1.3]
Ghir_A06G015530	K14085	aldehyde dehydrogenase family 7 member A1 [EC:1.2.1.31 1.2.1.8 1.2.1.3]
Ghir_A13G003530	K00145	N-acetyl-gamma-glutamyl-phosphate reductase [EC:1.2.1.38]
Ghir_A13G003530	K00145	N-acetyl-gamma-glutamyl-phosphate reductase [EC:1.2.1.38]
Ghir_D13G003770	K00145	N-acetyl-gamma-glutamyl-phosphate reductase [EC:1.2.1.38]
Ghir_D13G003770	K00145	N-acetyl-gamma-glutamyl-phosphate reductase [EC:1.2.1.38]
Ghir_D13G003770	K00145	N-acetyl-gamma-glutamyl-phosphate reductase [EC:1.2.1.38]
Ghir_D13G003770	K00145	N-acetyl-gamma-glutamyl-phosphate reductase [EC:1.2.1.38]
Ghir_A01G021440	K12657	delta-1-pyrroline-5-carboxylate synthetase [EC:2.7.2.11 1.2.1.41]
Ghir_A01G021450	K12657	delta-1-pyrroline-5-carboxylate synthetase [EC:2.7.2.11 1.2.1.41]
Ghir_A11G035380	K12657	delta-1-pyrroline-5-carboxylate synthetase [EC:2.7.2.11 1.2.1.41]
Ghir_D01G022970	K12657	delta-1-pyrroline-5-carboxylate synthetase [EC:2.7.2.11 1.2.1.41]
Ghir_D01G022970	K12657	delta-1-pyrroline-5-carboxylate synthetase [EC:2.7.2.11 1.2.1.41]
Ghir_D01G022970	K12657	delta-1-pyrroline-5-carboxylate synthetase [EC:2.7.2.11 1.2.1.41]
Ghir_D01G022970	K12657	delta-1-pyrroline-5-carboxylate synthetase [EC:2.7.2.11 1.2.1.41]
Ghir_D01G022970	K12657	delta-1-pyrroline-5-carboxylate synthetase [EC:2.7.2.11 1.2.1.41]
Ghir_D01G022970	K12657	delta-1-pyrroline-5-carboxylate synthetase [EC:2.7.2.11 1.2.1.41]
Ghir_D04G013490	K12657	delta-1-pyrroline-5-carboxylate synthetase [EC:2.7.2.11 1.2.1.41]
Ghir_D04G013490	K12657	delta-1-pyrroline-5-carboxylate synthetase [EC:2.7.2.11 1.2.1.41]
Ghir_D04G013490	K12657	delta-1-pyrroline-5-carboxylate synthetase [EC:2.7.2.11 1.2.1.41]
Ghir_D10G025280	K12657	delta-1-pyrroline-5-carboxylate synthetase [EC:2.7.2.11 1.2.1.41]
Ghir_D11G036240	K12657	delta-1-pyrroline-5-carboxylate synthetase [EC:2.7.2.11 1.2.1.41]
Ghir_D11G036240	K12657	delta-1-pyrroline-5-carboxylate synthetase [EC:2.7.2.11 1.2.1.41]
Ghir_A10G022820	K12657	delta-1-pyrroline-5-carboxylate synthetase [EC:2.7.2.11 1.2.1.41]
Ghir_A04G016360	K12657	delta-1-pyrroline-5-carboxylate synthetase [EC:2.7.2.11 1.2.1.41]
Ghir_D05G012050	K09753	cinnamoyl-CoA reductase [EC:1.2.1.44]
Ghir_A05G012340	K09753	cinnamoyl-CoA reductase [EC:1.2.1.44]
Ghir_A05G012340	K09753	cinnamoyl-CoA reductase [EC:1.2.1.44]
Ghir_D05G002490	K12355	coniferyl-aldehyde dehydrogenase [EC:1.2.1.68]
Ghir_D06G006510	K12355	coniferyl-aldehyde dehydrogenase [EC:1.2.1.68]
Ghir_D06G006510	K12355	coniferyl-aldehyde dehydrogenase [EC:1.2.1.68]
Ghir_D07G000450	K12355	coniferyl-aldehyde dehydrogenase [EC:1.2.1.68]
Ghir_D07G000460	K12355	coniferyl-aldehyde dehydrogenase [EC:1.2.1.68]
Ghir_D07G000460	K12355	coniferyl-aldehyde dehydrogenase [EC:1.2.1.68]
Ghir_A05G002330	K12355	coniferyl-aldehyde dehydrogenase [EC:1.2.1.68]
Ghir_A05G002330	K12355	coniferyl-aldehyde dehydrogenase [EC:1.2.1.68]
Ghir_A06G006430	K12355	coniferyl-aldehyde dehydrogenase [EC:1.2.1.68]
Ghir_A07G000740	K12355	coniferyl-aldehyde dehydrogenase [EC:1.2.1.68]
Ghir_A07G000750	K12355	coniferyl-aldehyde dehydrogenase [EC:1.2.1.68]
Ghir_A01G011310	K02492	glutamyl-tRNA reductase [EC:1.2.1.70]
Ghir_D01G012360	K02492	glutamyl-tRNA reductase [EC:1.2.1.70]
Ghir_D05G022010	K02492	glutamyl-tRNA reductase [EC:1.2.1.70]
Ghir_D05G022010	K02492	glutamyl-tRNA reductase [EC:1.2.1.70]
Ghir_D05G022010	K02492	glutamyl-tRNA reductase [EC:1.2.1.70]
Ghir_D05G022010	K02492	glutamyl-tRNA reductase [EC:1.2.1.70]
Ghir_D05G022010	K02492	glutamyl-tRNA reductase [EC:1.2.1.70]
Ghir_D05G022010	K02492	glutamyl-tRNA reductase [EC:1.2.1.70]
Ghir_A05G022080	K02492	glutamyl-tRNA reductase [EC:1.2.1.70]
Ghir_A05G022080	K02492	glutamyl-tRNA reductase [EC:1.2.1.70]
Ghir_A05G022080	K02492	glutamyl-tRNA reductase [EC:1.2.1.70]
Ghir_A05G022080	K02492	glutamyl-tRNA reductase [EC:1.2.1.70]
Ghir_A05G022080	K02492	glutamyl-tRNA reductase [EC:1.2.1.70]
Ghir_A05G022080	K02492	glutamyl-tRNA reductase [EC:1.2.1.70]
Ghir_D07G011660	K13356	alcohol-forming fatty acyl-CoA reductase [EC:1.2.1.84]
Ghir_D08G000910	K13356	alcohol-forming fatty acyl-CoA reductase [EC:1.2.1.84]
Ghir_D08G000910	K13356	alcohol-forming fatty acyl-CoA reductase [EC:1.2.1.84]
Ghir_D09G009860	K13356	alcohol-forming fatty acyl-CoA reductase [EC:1.2.1.84]
Ghir_D09G009860	K13356	alcohol-forming fatty acyl-CoA reductase [EC:1.2.1.84]
Ghir_D09G010020	K13356	alcohol-forming fatty acyl-CoA reductase [EC:1.2.1.84]
Ghir_D09G010020	K13356	alcohol-forming fatty acyl-CoA reductase [EC:1.2.1.84]
Ghir_D09G010020	K13356	alcohol-forming fatty acyl-CoA reductase [EC:1.2.1.84]
Ghir_D09G010020	K13356	alcohol-forming fatty acyl-CoA reductase [EC:1.2.1.84]
Ghir_D09G010020	K13356	alcohol-forming fatty acyl-CoA reductase [EC:1.2.1.84]
Ghir_D09G010020	K13356	alcohol-forming fatty acyl-CoA reductase [EC:1.2.1.84]
Ghir_D09G010020	K13356	alcohol-forming fatty acyl-CoA reductase [EC:1.2.1.84]
Ghir_D09G010020	K13356	alcohol-forming fatty acyl-CoA reductase [EC:1.2.1.84]
Ghir_D09G010020	K13356	alcohol-forming fatty acyl-CoA reductase [EC:1.2.1.84]
Ghir_D09G013360	K13356	alcohol-forming fatty acyl-CoA reductase [EC:1.2.1.84]
Ghir_A07G011650	K13356	alcohol-forming fatty acyl-CoA reductase [EC:1.2.1.84]
Ghir_A08G000910	K13356	alcohol-forming fatty acyl-CoA reductase [EC:1.2.1.84]
Ghir_A09G010130	K13356	alcohol-forming fatty acyl-CoA reductase [EC:1.2.1.84]
Ghir_A09G010260	K13356	alcohol-forming fatty acyl-CoA reductase [EC:1.2.1.84]
Ghir_A09G010260	K13356	alcohol-forming fatty acyl-CoA reductase [EC:1.2.1.84]
Ghir_A09G013860	K13356	alcohol-forming fatty acyl-CoA reductase [EC:1.2.1.84]
Ghir_A09G013860	K13356	alcohol-forming fatty acyl-CoA reductase [EC:1.2.1.84]
Ghir_A10G020790	K13356	alcohol-forming fatty acyl-CoA reductase [EC:1.2.1.84]
Ghir_D03G010120	K00294	1-pyrroline-5-carboxylate dehydrogenase [EC:1.2.1.88]
Ghir_D03G010120	K00294	1-pyrroline-5-carboxylate dehydrogenase [EC:1.2.1.88]
Ghir_A03G007610	K00294	1-pyrroline-5-carboxylate dehydrogenase [EC:1.2.1.88]
Ghir_D03G001670	K09842	abscisic-aldehyde oxidase [EC:1.2.3.14]
Ghir_D05G007960	K09842	abscisic-aldehyde oxidase [EC:1.2.3.14]
Ghir_D05G007980	K09842	abscisic-aldehyde oxidase [EC:1.2.3.14]
Ghir_D07G012340	K09842	abscisic-aldehyde oxidase [EC:1.2.3.14]
Ghir_D09G010730	K09842	abscisic-aldehyde oxidase [EC:1.2.3.14]
Ghir_D09G010730	K09842	abscisic-aldehyde oxidase [EC:1.2.3.14]
Ghir_D09G010730	K09842	abscisic-aldehyde oxidase [EC:1.2.3.14]
Ghir_D09G010730	K09842	abscisic-aldehyde oxidase [EC:1.2.3.14]
Ghir_A05G007910	K09842	abscisic-aldehyde oxidase [EC:1.2.3.14]
Ghir_A05G007920	K09842	abscisic-aldehyde oxidase [EC:1.2.3.14]
Ghir_A07G012220	K09842	abscisic-aldehyde oxidase [EC:1.2.3.14]
Ghir_A09G011170	K09842	abscisic-aldehyde oxidase [EC:1.2.3.14]
Ghir_A11G010870	K00161	pyruvate dehydrogenase E1 component alpha subunit [EC:1.2.4.1]
Ghir_D02G017380	K00161	pyruvate dehydrogenase E1 component alpha subunit [EC:1.2.4.1]
Ghir_D02G017390	K00161	pyruvate dehydrogenase E1 component alpha subunit [EC:1.2.4.1]
Ghir_D02G017380	K00161	pyruvate dehydrogenase E1 component alpha subunit [EC:1.2.4.1]
Ghir_D05G033190	K00161	pyruvate dehydrogenase E1 component alpha subunit [EC:1.2.4.1]
Ghir_D05G033190	K00161	pyruvate dehydrogenase E1 component alpha subunit [EC:1.2.4.1]
Ghir_A03G016120	K00161	pyruvate dehydrogenase E1 component alpha subunit [EC:1.2.4.1]
Ghir_D08G014280	K00161	pyruvate dehydrogenase E1 component alpha subunit [EC:1.2.4.1]
Ghir_D11G010810	K00161	pyruvate dehydrogenase E1 component alpha subunit [EC:1.2.4.1]
Ghir_D11G023350	K00161	pyruvate dehydrogenase E1 component alpha subunit [EC:1.2.4.1]
Ghir_D12G012800	K00161	pyruvate dehydrogenase E1 component alpha subunit [EC:1.2.4.1]
Ghir_D12G020610	K00161	pyruvate dehydrogenase E1 component alpha subunit [EC:1.2.4.1]
Ghir_D13G005430	K00161	pyruvate dehydrogenase E1 component alpha subunit [EC:1.2.4.1]
Ghir_A05G033690	K00161	pyruvate dehydrogenase E1 component alpha subunit [EC:1.2.4.1]
Ghir_A01G002240	K00162	pyruvate dehydrogenase E1 component beta subunit [EC:1.2.4.1]
Ghir_A01G002240	K00162	pyruvate dehydrogenase E1 component beta subunit [EC:1.2.4.1]
Ghir_A12G015220	K00162	pyruvate dehydrogenase E1 component beta subunit [EC:1.2.4.1]
Ghir_A12G015220	K00162	pyruvate dehydrogenase E1 component beta subunit [EC:1.2.4.1]
Ghir_D01G002140	K00162	pyruvate dehydrogenase E1 component beta subunit [EC:1.2.4.1]
Ghir_D01G002140	K00162	pyruvate dehydrogenase E1 component beta subunit [EC:1.2.4.1]
Ghir_D02G018070	K00162	pyruvate dehydrogenase E1 component beta subunit [EC:1.2.4.1]
Ghir_D02G018070	K00162	pyruvate dehydrogenase E1 component beta subunit [EC:1.2.4.1]
Ghir_D02G018070	K00162	pyruvate dehydrogenase E1 component beta subunit [EC:1.2.4.1]
Ghir_D02G018070	K00162	pyruvate dehydrogenase E1 component beta subunit [EC:1.2.4.1]
Ghir_D05G015060	K00162	pyruvate dehydrogenase E1 component beta subunit [EC:1.2.4.1]
Ghir_D06G015640	K00162	pyruvate dehydrogenase E1 component beta subunit [EC:1.2.4.1]
Ghir_D06G022150	K00162	pyruvate dehydrogenase E1 component beta subunit [EC:1.2.4.1]
Ghir_A03G016790	K00162	pyruvate dehydrogenase E1 component beta subunit [EC:1.2.4.1]
Ghir_D12G015450	K00162	pyruvate dehydrogenase E1 component beta subunit [EC:1.2.4.1]
Ghir_A05G015220	K00162	pyruvate dehydrogenase E1 component beta subunit [EC:1.2.4.1]
Ghir_A06G014930	K00162	pyruvate dehydrogenase E1 component beta subunit [EC:1.2.4.1]
Ghir_A06G021100	K00162	pyruvate dehydrogenase E1 component beta subunit [EC:1.2.4.1]
Ghir_D04G006600	K00164	2-oxoglutarate dehydrogenase E1 component [EC:1.2.4.2]
Ghir_D04G006610	K00164	2-oxoglutarate dehydrogenase E1 component [EC:1.2.4.2]
Ghir_D10G024060	K00164	2-oxoglutarate dehydrogenase E1 component [EC:1.2.4.2]
Ghir_A05G036450	K00164	2-oxoglutarate dehydrogenase E1 component [EC:1.2.4.2]
Ghir_A05G036460	K00164	2-oxoglutarate dehydrogenase E1 component [EC:1.2.4.2]
Ghir_A05G036460	K00164	2-oxoglutarate dehydrogenase E1 component [EC:1.2.4.2]
Ghir_A05G036460	K00164	2-oxoglutarate dehydrogenase E1 component [EC:1.2.4.2]
Ghir_A10G021980	K00164	2-oxoglutarate dehydrogenase E1 component [EC:1.2.4.2]
Ghir_A02G007230	K00166	2-oxoisovalerate dehydrogenase E1 component alpha subunit [EC:1.2.4.4]
Ghir_A02G007230	K00166	2-oxoisovalerate dehydrogenase E1 component alpha subunit [EC:1.2.4.4]
Ghir_D02G007660	K00166	2-oxoisovalerate dehydrogenase E1 component alpha subunit [EC:1.2.4.4]
Ghir_D02G007660	K00166	2-oxoisovalerate dehydrogenase E1 component alpha subunit [EC:1.2.4.4]
Ghir_D04G003480	K00166	2-oxoisovalerate dehydrogenase E1 component alpha subunit [EC:1.2.4.4]
Ghir_D05G024360	K00166	2-oxoisovalerate dehydrogenase E1 component alpha subunit [EC:1.2.4.4]
Ghir_A05G024560	K00166	2-oxoisovalerate dehydrogenase E1 component alpha subunit [EC:1.2.4.4]
Ghir_A05G039630	K00166	2-oxoisovalerate dehydrogenase E1 component alpha subunit [EC:1.2.4.4]
Ghir_A05G039630	K00166	2-oxoisovalerate dehydrogenase E1 component alpha subunit [EC:1.2.4.4]
Ghir_A05G039630	K00166	2-oxoisovalerate dehydrogenase E1 component alpha subunit [EC:1.2.4.4]
Ghir_A05G039630	K00166	2-oxoisovalerate dehydrogenase E1 component alpha subunit [EC:1.2.4.4]
Ghir_A05G039630	K00166	2-oxoisovalerate dehydrogenase E1 component alpha subunit [EC:1.2.4.4]
Ghir_A05G039630	K00166	2-oxoisovalerate dehydrogenase E1 component alpha subunit [EC:1.2.4.4]
Ghir_A05G039630	K00166	2-oxoisovalerate dehydrogenase E1 component alpha subunit [EC:1.2.4.4]
Ghir_A05G039630	K00166	2-oxoisovalerate dehydrogenase E1 component alpha subunit [EC:1.2.4.4]
Ghir_A05G039630	K00166	2-oxoisovalerate dehydrogenase E1 component alpha subunit [EC:1.2.4.4]
Ghir_A05G039630	K00166	2-oxoisovalerate dehydrogenase E1 component alpha subunit [EC:1.2.4.4]
Ghir_D05G000260	K00167	2-oxoisovalerate dehydrogenase E1 component beta subunit [EC:1.2.4.4]
Ghir_A05G000100	K00167	2-oxoisovalerate dehydrogenase E1 component beta subunit [EC:1.2.4.4]
Ghir_A05G000100	K00167	2-oxoisovalerate dehydrogenase E1 component beta subunit [EC:1.2.4.4]
Ghir_D09G017720	K00207	dihydropyrimidine dehydrogenase (NADP+) [EC:1.3.1.2]
Ghir_A09G018240	K00207	dihydropyrimidine dehydrogenase (NADP+) [EC:1.3.1.2]
Ghir_A02G008910	K22419	Delta4-3-oxosteroid 5beta-reductase [EC:1.3.1.3]
Ghir_A12G019190	K22419	Delta4-3-oxosteroid 5beta-reductase [EC:1.3.1.3]
Ghir_A13G021170	K22419	Delta4-3-oxosteroid 5beta-reductase [EC:1.3.1.3]
Ghir_D02G009100	K22419	Delta4-3-oxosteroid 5beta-reductase [EC:1.3.1.3]
Ghir_D02G021630	K22419	Delta4-3-oxosteroid 5beta-reductase [EC:1.3.1.3]
Ghir_D05G021260	K22419	Delta4-3-oxosteroid 5beta-reductase [EC:1.3.1.3]
Ghir_A03G020210	K22419	Delta4-3-oxosteroid 5beta-reductase [EC:1.3.1.3]
Ghir_D09G006930	K22419	Delta4-3-oxosteroid 5beta-reductase [EC:1.3.1.3]
Ghir_D09G006950	K22419	Delta4-3-oxosteroid 5beta-reductase [EC:1.3.1.3]
Ghir_D09G006960	K22419	Delta4-3-oxosteroid 5beta-reductase [EC:1.3.1.3]
Ghir_D09G006970	K22419	Delta4-3-oxosteroid 5beta-reductase [EC:1.3.1.3]
Ghir_D12G019410	K22419	Delta4-3-oxosteroid 5beta-reductase [EC:1.3.1.3]
Ghir_D13G022030	K22419	Delta4-3-oxosteroid 5beta-reductase [EC:1.3.1.3]
Ghir_A05G021310	K22419	Delta4-3-oxosteroid 5beta-reductase [EC:1.3.1.3]
Ghir_A09G007220	K22419	Delta4-3-oxosteroid 5beta-reductase [EC:1.3.1.3]
Ghir_A09G007230	K22419	Delta4-3-oxosteroid 5beta-reductase [EC:1.3.1.3]
Ghir_D09G025810	K22419	Delta4-3-oxosteroid 5beta-reductase [EC:1.3.1.3]
Ghir_A13G022700	K00208	enoyl-[acyl-carrier protein] reductase I [EC:1.3.1.9 1.3.1.10]
Ghir_A13G022700	K00208	enoyl-[acyl-carrier protein] reductase I [EC:1.3.1.9 1.3.1.10]
Ghir_D04G009540	K00208	enoyl-[acyl-carrier protein] reductase I [EC:1.3.1.9 1.3.1.10]
Ghir_D08G001780	K00208	enoyl-[acyl-carrier protein] reductase I [EC:1.3.1.9 1.3.1.10]
Ghir_D13G023360	K00208	enoyl-[acyl-carrier protein] reductase I [EC:1.3.1.9 1.3.1.10]
[truncated: 60,107 more rows]
