# Supplementary material for: Genome-wide identification and functional analysis of class III peroxidases in Gossypium hirsutum
Source: PeerJ. 2022 Jul 1;10:e13635. doi: 10.7717/peerj.13635 (PMC9252181; doi:10.7717/peerj.13635)
Supplement: Supplemental Information 2 [file peerj-10-13635-s002.xlsx]

## Sheet: Sheet1
Primer name	Primer Sequence (5'-3')	Used to
GhPRX107-F	TTGTGGATCACCAACTGGCT	analyse the relative transcript levels of cotton PRX genes by qRT-PCR
GhPRX107-R	TGTCTCTTGGAAAAGAAACAAGTAA
GhPRX128-F	CTTGCCCCAACACTGTTTCC
GhPRX128-R	CCCACATTGCTAAACCTGTTCT
qRT-PCR-GhPRX-F	CAAGGATTCTTGTCCTCAGGCT	Analyse the silencing efficiency of GhPRX107 gene by qRT-PCR
qRT-PCR-GhPRX-R	TAGGCCAAAGCTCCTGTCTG
