# Supplementary material for: Genome-wide identification and functional analysis of class III peroxidases in Gossypium hirsutum
Source: PeerJ. 2022 Jul 1;10:e13635. doi: 10.7717/peerj.13635 (PMC9252181; doi:10.7717/peerj.13635)
Supplement: Supplemental Information 3 [file peerj-10-13635-s003.xlsx]

## Sheet: Sheet1
Table S3. Primer used for plasmid construction in this study
Vector	Primer Name	Primer Sequence (5'to 3')	Cleavage Sites
TRV2	TRV2-F	TAAGGTTACCGAATTCATGAGGAAAATCATGGGTGCCAAAG	EcoRⅠ
	TRV2-R	GCTCGGTACCGGATCCTCTCTAGCAGACAGAACAAGGATATCAGC	BamHⅠ
PRI-AN-101	PRI-F	TTCAGAATTCGGATCTTAGTGAAGCTTGTTTGCAAGATTGCATT	EcoRI
	PRI-R	CACTGTTGATACATAATGAGGAAAATCATGGGTGCCA	XbaI
