# Supplementary material for: Genome-wide identification and functional analysis of class III peroxidases in Gossypium hirsutum
Source: PeerJ. 2022 Jul 1;10:e13635. doi: 10.7717/peerj.13635 (PMC9252181; doi:10.7717/peerj.13635)
Supplement: Supplemental Information 4 [file peerj-10-13635-s004.xlsx]

## Sheet: Sheet1
Table S4.List of the identified PRX genes in cotton
ID	Cotton Identfier	Chromosomal location	CDS length (bp)	Protein length (bp)	Molecular weight(KD)	Isoelectric point (PI)	Signal Peptide (SP)	Subcellular location
GhPRX1	Ghir_A01G013500.1	A01 : 70819021-70820046 : +	927	308	34.535	8.35	Yes	chloroplast
GhPRX2	Ghir_A01G013780.1	A01 : 75348862-75350224 : +	960	319	34.519	7.925	Yes	chloroplast
GhPRX3	Ghir_A01G016980.1	A01 : 107871126-107873331 : -	972	323	34.892	5.693	Yes	chloroplast
GhPRX4	Ghir_A02G005650.1	A02 : 8088831-8090165 : +	993	330	35.599	4.074	Yes	extracellular
GhPRX5	Ghir_A02G006580.1	A02 : 10395938-10398392 : +	1029	342	37.147	5.162	Yes	chloroplast
GhPRX6	Ghir_A02G009350.1	A02 : 27667917-27669918 : -	1020	339	37.95	8.29	Yes	chloroplast
GhPRX7	Ghir_A02G013970.1	A02 : 93575195-93577041 : -	984	327	35.325	8.199	No	chloroplast
GhPRX8	Ghir_A02G016820.1	A02 : 105213204-105216348 : -	993	330	36.013	9.436	Yes	chloroplast
GhPRX9	Ghir_A02G018930.1	A02 : 107633175-107635805 : -	954	317	34.249	9.598	Yes	endoplasmic reticulum
GhPRX10	Ghir_A03G003150.1	A03 : 4841103-4843952 : +	1071	356	38.516	9.941	No	plasma
GhPRX11	Ghir_A03G003160.1	A03 : 4850242-4851888 : +	909	302	32.583	8.194	Yes	extracellular
GhPRX12	Ghir_A03G012130.1	A03 : 70529487-70530666 : +	972	323	35.548	6.499	Yes	extracellular
GhPRX13	Ghir_A03G012260.1	A03 : 71915926-71917646 : +	987	328	35.934	8.865	Yes	chloroplast
GhPRX14	Ghir_A03G012270.1	A03 : 71968143-71970526 : +	948	315	34.765	8.318	No	nucleus
GhPRX15	Ghir_A04G004660.1	A04 : 12430001-12431540 : -	921	306	32.838	8.499	Yes	chloroplast
GhPRX16	Ghir_A04G008350.1	A04 : 65105483-65107715 : +	954	317	35.866	7.299	Yes	extracellular
GhPRX17	Ghir_A04G013140.1	A04 : 81840796-81844490 : -	981	326	36.244	7.22	No	chloroplast
GhPRX18	Ghir_A05G001710.1	A05 : 1730692-1731924 : +	963	320	34.922	7.339	Yes	extracellular
GhPRX19	Ghir_A05G008300.1	A05 : 7576106-7587975 : -	1014	337	36.162	6.731	Yes	extracellular
GhPRX20	Ghir_A05G016230.1	A05:15305219-15307204:+	987	328	35.866	9.435	Yes	chloroplast
GhPRX21	Ghir_A05G017690.1	A05 : 16882210-16883325 : +	1011	336	36.816	8.25	No	cytoplasm
GhPRX22	Ghir_A05G018790.1	A05 : 17805799-17807473 : +	951	316	34.184	9.504	Yes	endoplasmic reticulum
GhPRX23	Ghir_A05G019420.1	A05 : 18523939-18525576 : +	1050	349	37.729	7.696	Yes	extracellular
GhPRX24	Ghir_A05G028580.1	A05 : 31823920-31825399 : -	813	270	29.135	9.34	Yes	nucleus
GhPRX25	Ghir_A05G034970.1	A05 : 81866864-81869775 : -	972	323	35.193	4.674	Yes	plasma
GhPRX26	Ghir_A05G037420.1	A05 : 98443041-98444762 : +	966	321	35.473	8.858	Yes	extracellular
GhPRX27	Ghir_A05G038670.1	A05 : 101964643-101966195 : +	918	305	33.791	4.923	Yes	extracellular
GhPRX28	Ghir_A05G041410.1	A05 : 107426285-107428253 : +	993	330	35.424	9.733	Yes	chloroplast
GhPRX29	Ghir_A06G000160.1	A06 : 97215-98983 : +	954	317	34.22	9.283	Yes	vacuoble
GhPRX30	Ghir_A06G011000.1	A06 : 41416969-41418735 : +	1038	345	37.148	4.398	Yes	extracellular
GhPRX31	Ghir_A06G022890.1	Scaffold2999 : 12303-15207 : +	747	248	26.667	8.889	Yes	chloroplast
GhPRX32	Ghir_A07G000130.1	A07 : 154399-156562 : -	783	260	28.546	8.907	Yes	extracellular
GhPRX33	Ghir_A07G003800.1	A07 : 4200539-4202200 : +	996	331	35.82	4.818	Yes	chloroplast
GhPRX34	Ghir_A07G023450.1	A07 : 95606622-95608070 : -	981	326	35.759	8.136	Yes	extracellular
GhPRX35	Ghir_A07G024460.1	A07 : 96913776-96915402 : -	936	311	34.139	7.738	Yes	chloroplast
GhPRX36	Ghir_A07G024640.1	A07 : 97104485-97105907 : +	966	321	34.92	4.265	Yes	chloroplast
GhPRX37	Ghir_A07G024650.1	A07 : 97106178-97107910 : +	975	324	35.421	7.682	Yes	extracellular
GhPRX38	Ghir_A08G004330.1	A08 : 4664185-4665554 : -	1002	333	35.893	7.906	Yes	chloroplast
GhPRX39	Ghir_A08G004340.1	A08 : 4723079-4724441 : +	1005	334	35.614	8.258	Yes	chloroplast
GhPRX40	Ghir_A08G004350.1	A08 : 4762583-4763945 : -	1005	334	35.598	8.26	Yes	chloroplast
GhPRX41	Ghir_A08G004360.1	A08 : 4766265-4767354 : +	951	316	33.77	8.551	Yes	chloroplast
GhPRX42	Ghir_A08G008400.1	A08 : 18429898-18432168 : +	999	332	35.189	5.706	No	chloroplast
GhPRX43	Ghir_A08G008410.1	A08 : 19005235-19011151 : +	885	294	31.846	4.08	No	cytoplasm
GhPRX44	Ghir_A08G008430.1	A08 : 19056647-19058402 : -	1032	343	36.814	4.506	Yes	chloroplast
GhPRX45	Ghir_A08G008860.1	A08 : 26108062-26111615 : +	990	329	36.303	10.429	Yes	nucleus
GhPRX46	Ghir_A08G021300.1	A08 : 117038295-117039995 : +	966	321	34.628	5.674	Yes	chloroplast
GhPRX47	Ghir_A08G022920.1	A08 : 119010867-119012098 : +	960	319	34.89	9.89	Yes	chloroplast
GhPRX48	Ghir_A08G024060.1	A08 : 120395470-120397234 : -	969	322	34.951	7.753	Yes	chloroplast
GhPRX49	Ghir_A09G006880.1	A09 : 53082884-53086605 : -	984	327	36.37	8.952	Yes	chloroplast
GhPRX50	Ghir_A09G013730.1	A09 : 68482327-68484096 : +	963	320	33.939	5.212	Yes	chloroplast
GhPRX51	Ghir_A09G016000.1	A09 : 72163620-72166145 : +	990	329	37.119	6.576	Yes	chloroplast
GhPRX52	Ghir_A09G022530.1	A09 : 78695873-78707120 : -	954	317	34.685	9.675	Yes	chloroplast
GhPRX53	Ghir_A09G022540.1	A09 : 78709670-78710947 : +	951	316	34.544	10.034	Yes	chloroplast
GhPRX54	Ghir_A09G022550.1	A09 : 78712522-78719458 : +	1035	344	37.563	8.803	Yes	plasma
GhPRX55	Ghir_A09G022560.1	A09 : 78720722-78724705 : -	951	316	34.522	9.911	Yes	chloroplast
GhPRX56	Ghir_A10G006110.1	A10 : 7310429-7311934 : -	1038	345	38.199	6.034	Yes	extracellular
GhPRX57	Ghir_A10G008850.1	A10 : 17007473-17009135 : -	993	330	35.908	9.883	Yes	chloroplast
GhPRX58	Ghir_A10G010330.1	A10 : 22269320-22271857 : +	984	327	35.846	9.841	Yes	chloroplast
GhPRX59	Ghir_A10G010360.1	A10 : 22292254-22293838 : +	993	330	36.024	8.943	Yes	chloroplast
GhPRX60	Ghir_A10G015080.1	A10 : 82391966-82394249 : +	972	323	33.971	8.325	Yes	chloroplast
GhPRX61	Ghir_A10G015090.1	A10 : 82513212-82514504 : +	954	317	34.63	9.067	Yes	extracellular
GhPRX62	Ghir_A10G017680.1	A10:98268121-98270590:+	972	323	35.585	8.641	Yes	chloroplast
GhPRX63	Ghir_A10G018640.1	A10 : 101345720-101347187 : +	963	320	35.349	10.406	Yes	vacuoble
GhPRX64	Ghir_A10G018650.1	A10 : 101347704-101348870 : +	957	318	34.206	9.498	Yes	extracellular
GhPRX65	Ghir_A11G004880.1	A11 : 4229430-4231092 : -	996	331	36.494	9.369	Yes	extracellular
GhPRX66	Ghir_A11G006260.1	A11 : 5491501-5492734 : +	945	314	34.971	9.21	No	chloroplast
GhPRX67	Ghir_A11G019080.1	A11 : 25857059-25858673 : -	1005	334	36.929	8.456	Yes	extracellular
GhPRX68	Ghir_A11G021430.1	A11 : 47032390-47033909 : +	966	321	34.968	7.998	Yes	chloroplast
GhPRX69	Ghir_A11G021660.1	A11 : 49486759-49489648 : +	972	323	35.584	4.719	Yes	chloroplast
GhPRX70	Ghir_A11G024800.1	A11 : 91548083-91549024 : -	831	276	30.459	10.837	Yes	vacuoble
GhPRX71	Ghir_A12G000750.1	A12 : 886718-907537 : -	1947	648	70.61	8.113	Yes	extracellular
GhPRX72	Ghir_A12G000760.1	A12 : 910995-912215 : -	972	323	35.561	8.99	Yes	chloroplast
GhPRX73	Ghir_A12G008420.1	A12 : 37125058-37126443 : +	990	329	36.654	4.878	Yes	vacuoble
GhPRX74	Ghir_A12G016660.1	A12 : 91600282-91602268 : -	1023	340	37.138	9.362	No	endoplasmic reticulum
GhPRX75	Ghir_A12G016850.1	A12 : 92232396-92233876 : -	1011	336	37.078	5.049	Yes	extracellular
GhPRX76	Ghir_A12G022350.1	A12 : 101145145-101146663 : -	1014	337	37.884	6.002	Yes	vacuoble
GhPRX77	Ghir_A12G025870.1	A12 : 104635939-104637562 : +	990	329	35.629	7.676	No	plasma
GhPRX78	Ghir_A12G027530.1	A12 : 106143390-106145595 : -	972	323	35.715	9.049	Yes	chloroplast
GhPRX79	Ghir_A12G028960.1	A12 : 107598015-107599596 : -	1005	334	37.166	7.729	Yes	extracellular
GhPRX80	Ghir_A13G000360.1	A13 : 334130-336441 : +	978	325	35.413	9.015	Yes	extracellular
GhPRX81	Ghir_A13G025050.1	Scaffold2435 : 27664-29275 : -	987	328	35.298	7.36	Yes	chloroplast
GhPRX82	Ghir_A13G025060.1	Scaffold2435 : 32248-34508 : +	945	314	34.324	6.765	No	nucleus
GhPRX83	Ghir_A13G025070.1	Scaffold2435:51708-53591；-	975	324	34.893	6.653	Yes	extracellular
GhPRX84	Ghir_D01G014610.1	D01 : 38754059-38755231 : -	996	331	36.892	8.188	Yes	chloroplast
GhPRX85	Ghir_D01G014680.1	D01 : 39083233-39084345 : +	996	331	36.749	7.968	Yes	chloroplast
GhPRX86	Ghir_D01G015040.1	D01 : 41688798-41691933 : +	999	332	36.056	8.198	No	plasma
GhPRX87	Ghir_D01G015060.1	D01 : 41756524-41758072 : +	969	322	34.695	7.925	Yes	chloroplast
GhPRX88	Ghir_D01G018530.1	D01 : 55635722-55637960 : -	972	323	34.892	5.396	Yes	chloroplast
GhPRX89	Ghir_D02G006000.1	D02 : 8021170-8022415 : +	987	328	35.545	4.134	Yes	extracellular
GhPRX90	Ghir_D02G006990.1	D02 : 9693546-9696440 : +	1116	371	40.616	7.696	No	mitochondrian
GhPRX91	Ghir_D02G011420.1	D02 : 30069641-30071592 : -	1020	339	37.905	8.451	Yes	chloroplast
GhPRX92	Ghir_D02G013640.1	D02 : 45740810-45742049 : +	1008	335	36.753	5.381	Yes	extracellular
GhPRX93	Ghir_D02G013810.1	D02 : 46773318-46775075 : +	987	328	35.988	9.025	Yes	vacuoble
GhPRX94	Ghir_D02G013820.1	D02 : 46887699-46889423 : +	984	327	35.431	7.718	Yes	extracellular
GhPRX95	Ghir_D03G000640.1	D03 : 397556-399526 : +	954	317	34.264	9.272	Yes	extracellular
GhPRX96	Ghir_D03G002800.1	D03 : 2700840-2703009 : +	993	330	35.981	9.443	Yes	chloroplast
GhPRX97	Ghir_D03G015870.1	D03 : 48391685-48402155 : -	969	322	34.681	8.896	Yes	extracellular
GhPRX98	Ghir_D04G001520.1	D04 : 1856473-1858443 : -	993	330	35.405	9.401	Yes	chloroplast
GhPRX99	Ghir_D04G004410.1	D04 : 6345235-6347063 : -	972	323	35.653	5.049	Yes	extracellular
GhPRX100	Ghir_D04G008130.1	D04 : 15734885-15736388 : -	1023	340	37.555	9.712	No	cytoplasm
GhPRX101	Ghir_D04G008140.1	D04 : 15742337-15743901 : -	858	285	31.228	4.794	Yes	glog_plas
GhPRX102	Ghir_D04G012400.1	D04 : 41222012-41224266 : +	954	317	35.869	7.064	Yes	extracellular
GhPRX103	Ghir_D04G017500.1	D04 : 52877251-52879607 : -	1020	339	37.419	7.403	No	chloroplast
GhPRX104	Ghir_D05G001910.1	D05 : 1669554-1671300 : +	978	325	35.03	7.992	Yes	chloroplast
GhPRX105	Ghir_D05G006440.1	D05 : 5172811-5174685 : +	999	332	36.016	5.049	No	extracellular
GhPRX106	Ghir_D05G008310.1	D05 : 6808295-6809996 : -	1071	356	38.313	7.22	No	endoplasmic reticulum
GhPRX107	Ghir_D05G017420.1	D05 : 15176644-15179114 : -	996	331	37.498	8.541	Yes	cytoplasm
GhPRX108	Ghir_D05G018800.1	D05 : 16318211-16319823 : +	951	316	34.216	9.47	Yes	endoplasmic reticulum
GhPRX109	Ghir_D05G019450.1	D05 : 16981191-16982794 : +	1050	349	37.796	7.977	Yes	endoplasmic reticulum
GhPRX110	Ghir_D05G025150.1	D05 : 23443251-23444521 : -	921	306	33.396	4.731	Yes	chloroplast
GhPRX111	Ghir_D05G028610.1	D05 : 28029926-28031467 : -	972	323	34.861	8.917	Yes	chloroplast
GhPRX112	Ghir_D05G034510.1	D05 : 51987772-51989734 : +	951	316	33.69	8.497	Yes	chloroplast
GhPRX113	Ghir_D06G012120.1	D06 : 28856310-28858164 : -	1038	345	37.205	4.455	Yes	endoplasmic reticulum
GhPRX114	Ghir_D06G012460.1	D06:30700631-30704095:+	1050	349	37.913	8.386	Yes	chloroplast
GhPRX115	Ghir_D07G000160.1	D07 : 208785-210602 : -	996	331	36.415	9.106	Yes	extracellular
GhPRX116	Ghir_D07G017760.1	D07 : 33252638-33253752 : -	918	305	33.468	9.177	Yes	chloroplast
GhPRX117	Ghir_D07G017770.1	D07 : 33326151-33328665 : -	981	326	36.009	9.592	Yes	chloroplast
GhPRX118	Ghir_D07G023530.1	D07 : 57085712-57087212 : -	981	326	35.767	8.136	Yes	extracellular
GhPRX119	Ghir_D07G024710.1	D07 : 58549875-58551275 : +	966	321	35.071	4.345	Yes	chloroplast
GhPRX120	Ghir_D07G024720.1	D07 : 58551778-58553217 : +	975	324	35.38	7.24	Yes	extracellular
GhPRX121	Ghir_D08G004540.1	D08 : 4647576-4648662 : +	846	281	29.873	8.104	Yes	vacuoble
GhPRX122	Ghir_D08G004560.1	D08 : 4668957-4670188 : +	1020	339	36.478	8.849	Yes	chloroplast
GhPRX123	Ghir_D08G008470.1	D08 : 13999868-14002065 : +	999	332	35.792	6.496	Yes	chloroplast
GhPRX124	Ghir_D08G008490.1	D08 : 14242912-14244664 : -	1044	347	37.438	4.6	Yes	extracellular
GhPRX125	Ghir_D08G009020.1	D08 : 17395616-17398998 : +	924	307	33.96	10.498	Yes	nucleus
GhPRX126	Ghir_D08G022090.1	D08 : 63552911-63554539 : +	963	320	34.469	5.36	Yes	chloroplast
GhPRX127	Ghir_D08G023820.1	D08 : 65421309-65422599 : +	945	314	34.213	9.444	Yes	chloroplast
GhPRX128	Ghir_D08G024980.1	D08 : 66629672-66631377 : -	969	322	34.883	7.753	Yes	chloroplast
GhPRX129	Ghir_D09G006590.1	D09 : 30224638-30228474 : -	990	329	36.598	9.743	Yes	vacuoble
GhPRX130	Ghir_D09G013210.1	D09 : 40971164-40972601 : +	1020	339	35.973	4.952	Yes	extracellular
GhPRX131	Ghir_D09G015430.1	D09 : 43859055-43861594 :	990	329	37.045	6.283	Yes	chloroplast
GhPRX132	Ghir_D09G017350.1	D09 : 45642944-45644293 : -	1083	360	39.808	6.762	No	cytoplasm
GhPRX133	Ghir_D09G021780.1	D09 : 49783463-49784620 : +	951	316	34.577	9.757	Yes	chloroplast
GhPRX134	Ghir_D09G021790.1	D09 : 49786265-49787389 : +	951	316	34.524	9.378	Yes	chloroplast
GhPRX135	Ghir_D09G021800.1	D09 : 49789855-49790819 : -	792	263	28.613	9.377	No	nucleus
GhPRX136	Ghir_D09G021810.1	D09 : 49797880-49799003 : -	951	316	34.617	9.899	Yes	extracellular
GhPRX137	Ghir_D10G006930.1	D10 : 6875605-6877275 : -	1038	345	38.194	6.118	Yes	extracellular
GhPRX138	Ghir_D10G010430.1	D10 : 13240606-13241879 : +	993	330	36	9.99	Yes	chloroplast
GhPRX139	Ghir_D10G012470.1	D10 : 19686672-19688047 : -	954	317	34.542	9.064	Yes	chloroplast
GhPRX140	Ghir_D10G012480.1	D10 : 19744689-19746863 : -	972	323	34.062	7.66	Yes	chloroplast
GhPRX141	Ghir_D10G017640.1	D10 : 47929451-47931034 : -	993	330	36.093	8.984	Yes	chloroplast
GhPRX142	Ghir_D10G019140.1	D10 : 52934407-52936680 : +	972	323	35.715	8.791	Yes	chloroplast
GhPRX143	Ghir_D10G020140.1	D10 : 55214361-55215690 : +	963	320	34.753	8.963	Yes	chloroplast
GhPRX144	Ghir_D10G020170.1	D10 : 55327426-55328869 : +	963	320	35.231	10.39	Yes	vacuoble
GhPRX145	Ghir_D10G020180.1	D10 : 55329387-55330561 : +	957	318	34.159	9.491	Yes	extracellular
GhPRX146	Ghir_D11G004780.1	D11 : 3891470-3893049 : -	996	331	36.567	9.222	Yes	extracellular
GhPRX147	Ghir_D11G006200.1	D11 : 5103710-5105018 : +	1002	333	37.009	9.093	Yes	extracellular
GhPRX148	Ghir_D11G019190.1	D11 : 21370060-21371310 : -	969	322	35.543	8.456	Yes	extracellular
GhPRX149	Ghir_D11G022730.1	D11 : 33420509-33423465 : -	972	323	35.508	4.659	Yes	chloroplast
GhPRX150	Ghir_D11G023090.1	D11 : 34850066-34851610 : +	966	321	34.897	7.736	Yes	chloroplast
GhPRX151	Ghir_D11G025000.1	D11 : 50764271-50765538 : -	891	296	32.816	10.882	Yes	vacuoble
GhPRX152	Ghir_D12G000730.1	D12 : 872369-873585 : -	972	323	35.394	8.259	Yes	extracellular
GhPRX153	Ghir_D12G000770.1	D12 : 895853-897007 : -	888	295	32.037	8.354	No	chloroplast
GhPRX154	Ghir_D12G000780.1	D12 : 903722-920737 : -	1374	457	49.673	7.167	Yes	extracellular
GhPRX155	Ghir_D12G007270.1	D12 : 13741355-13743168 : +	984	327	36.223	6.761	Yes	extracellular
GhPRX156	Ghir_D12G008190.1	D12 : 22367396-22369054 : +	990	329	36.466	4.72	Yes	extracellular
GhPRX157	Ghir_D12G009050.1	D12 : 29490066-29494457 : -	993	330	35.769	8.489	Yes	chloroplast
GhPRX158	Ghir_D12G016910.1	D12 : 49483080-49484931 : -	708	235	25.639	10.012	No	chloroplast
GhPRX159	Ghir_D12G017120.1	D12 : 49762753-49764299 : -	1017	338	37.296	5.21	Yes	extracellular
GhPRX160	Ghir_D12G022330.1	D12 : 56402261-56403555 : -	1002	333	37.488	5.481	Yes	vacuoble
GhPRX161	Ghir_D12G025890.1	D12 : 59713534-59719532 : +	969	322	35.038	7.678	Yes	plasma
GhPRX162	Ghir_D12G027560.1	D12 : 61265536-61268048 : -	972	323	35.478	8.716	Yes	chloroplast
GhPRX163	Ghir_D12G029130.1	D12 : 62569092-62570704 : -	1005	334	37.094	7.729	Yes	extracellular
GhPRX164	Ghir_D13G009170.1	D13 : 18768929-18770914 : +	978	325	34.945	6.6764	Yes	extracellular
GhPRX165	Ghir_D13G009180.1	D13 : 18787683-18790156 : -	945	314	34.314	6.851	Yes	nucleus
GhPRX166	Ghir_D13G009200.1	D13 : 18801772-18805037 : +	984	327	35.67	6.765	No	cytoplasm
GaPRX1	Garb_01G003590.1	Chr01:4441268..4451833	1200	399	43.47	8.76	Yes	Endoplasmic reticulum
GaPRX2	Garb_01G012590.1	Chr01:46702201..46704902	996	331	36.89	7.24	Yes	chloroplast
GaPRX3	Garb_01G012610.1	Chr01:47045121..47046116	996	331	36.8	7.24	Yes	chloroplast
GaPRX4	Garb_02G000610.1	Chr02:332018..333764	954	317	34.25	9.27	Yes	Endoplasmic reticulum
GaPRX5	Garb_02G002950.1	Chr02:3219353..3222411	993	330	36.08	9.6	Yes	chloroplast
GaPRX6	Garb_02G006590.1	Chr02:16514174..16515384	984	327	35.53	8.38	No	chloroplast
GaPRX7	Garb_02G014990.1	Chr02:105059272..105060906	972	323	34.89	5.39	Yes	chloroplast
GaPRX8	Garb_03G012960.1	Chr03:40129361..40130717	984	327	35.52	7.98	Yes	extracellular
GaPRX9	Garb_03G012970.1	Chr03:40187523..40189600	987	328	35.97	9.02	Yes	plasma
GaPRX10	Garb_03G013260.1	Chr03:41762075..41763255	963	320	35.19	6.49	Yes	extracellular
GaPRX11	Garb_03G021570.1	Chr03:127454640..127457457	1116	371	40.52	7.69	No	Mitochondrial
GaPRX12	Garb_03G022590.1	Chr03:129924284..129925569	987	328	35.46	4.07	Yes	chloroplast
GaPRX13	Garb_04G001690.1	Chr04:2037524..2039223	969	322	34.48	9.61	Yes	chloroplast
GaPRX14	Garb_04G004640.1	Chr04:7661883..7663686	972	323	35.71	5.22	No	extracellular
GaPRX15	Garb_04G006120.1	Chr04:11345260..11346578	966	321	35.44	8.76	Yes	extracellular
GaPRX16	Garb_04G009260.1	Chr04:23760058..23762102	972	323	35.43	8.55	Yes	Vacuolar
GaPRX17	Garb_04G009270.1	Chr04:23780010..23781570	975	324	35.07	4.57	Yes	plasma
GaPRX18	Garb_04G015300.1	Chr04:100597012..100599224	987	328	37.17	7.29	Yes	extracellular
GaPRX19	Garb_04G021360.1	Chr04:118649080..118651247	1020	339	37.62	7.72	No	chloroplast
GaPRX20	Garb_05G004550.1	Chr05:4212033..4213827	999	332	36.06	5.04	No	chloroplast
GaPRX21	Garb_05G006520.1	Chr05:5902384..5903740	1014	337	36.17	6.27	No	Endoplasmic reticulum
GaPRX22	Garb_05G014630.1	Chr05:13418306..13420304	1053	350	38.21	9.51	Yes	chloroplast
GaPRX23	Garb_05G015980.1	Chr05:14890626..14892772	999	332	37.65	8.54	Yes	cytoplasm
GaPRX24	Garb_05G017330.1	Chr05:16018394..16019879	951	316	34.14	9.32	Yes	Endoplasmic reticulum
GaPRX25	Garb_05G018040.1	Chr05:16742110..16743482	1050	349	37.76	7.97	Yes	extracellular
GaPRX26	Garb_05G027300.1	Chr05:29599413..29600738	972	323	34.97	9.47	Yes	chloroplast
GaPRX27	Garb_05G035910.1	Chr05:80106151..80107687	951	316	33.77	8.66	Yes	chloroplast
GaPRX28	Garb_06G013670.1	Chr06:81750098..81752675	1050	349	37.92	8.38	Yes	chloroplast
GaPRX29	Garb_06G015240.1	Chr06:98175163..98176555	1038	345	37.17	4.39	Yes	extracellular
GaPRX30	Garb_06G027900.1	Chr06:143291877..143293283	954	317	34.23	9.28	Yes	vacuoble
GaPRX31	Garb_07G000550.1	Chr07:632174..633324	975	324	35.45	7.68	Yes	extracellular
GaPRX32	Garb_07G000560.1	Chr07:634120..635331	966	321	34.89	4.26	Yes	chloroplast
GaPRX33	Garb_07G000770.1	Chr07:867636..870831	960	319	34.86	8.21	Yes	chloroplast
GaPRX34	Garb_07G001800.1	Chr07:2309837..2311156	981	326	35.69	7.93	Yes	extracellular
GaPRX35	Garb_07G025900.1	Chr07:101859768..101861372	996	331	35.82	4.81	Yes	chloroplast
GaPRX36	Garb_07G029730.1	Chr07:105914682..105915935	996	331	36.38	9.58	Yes	extracellular
GaPRX37	Garb_08G002780.1	Chr08:2235537..2236957	939	312	33.94	8.01	Yes	chloroplast
GaPRX38	Garb_08G004120.1	Chr08:3662901..3663940	960	319	34.86	9.77	Yes	chloroplast
GaPRX39	Garb_08G022640.1	Chr08:113227509..113230849	990	329	36.32	10.33	Yes	Nuclear
GaPRX40	Garb_08G023370.1	Chr08:121432559..121434215	1032	343	36.87	4.45	Yes	extracellular
GaPRX41	Garb_08G023390.1	Chr08:121504687..121506249	1056	351	38.2	4.63	Yes	vacuoble
GaPRX42	Garb_08G028500.1	Chr08:136871536..136872626	1005	334	35.65	8.4	Yes	chloroplast
GaPRX43	Garb_08G028510.1	Chr08:136875042..136876132	1005	334	35.65	8.4	Yes	chloroplast
GaPRX44	Garb_08G028520.1	Chr08:136911856..136912944	1005	334	35.65	8.4	Yes	chloroplast
GaPRX45	Garb_08G028560.1	Chr08:136957396..136958567	1002	333	35.86	8.09	Yes	chloroplast
GaPRX46	Garb_09G009300.1	Chr09:59706395..59710141	990	329	36.57	9.29	Yes	chloroplast
GaPRX47	Garb_09G016720.1	Chr09:75978215..75979619	1020	339	35.96	5.22	Yes	chloroplast
GaPRX48	Garb_09G019250.1	Chr09:79615288..79617142	990	329	37.11	6.57	Yes	chloroplast
GaPRX49	Garb_09G021190.1	Chr09:81373565..81374551	987	328	36.07	7.06	Yes	extracellular
GaPRX50	Garb_10G006990.1	Chr10:7625610..7626807	1038	345	38.14	6.22	Yes	extracellular
GaPRX51	Garb_10G010170.1	Chr10:18422423..18423960	993	330	35.92	9.88	Yes	chloroplast
GaPRX52	Garb_10G020660.1	Chr10:101319195..101320558	975	324	35.31	9.61	Yes	chloroplast
GaPRX53	Garb_10G020670.1	Chr10:101334387..101336566	975	324	35.31	9.61	Yes	chloroplast
GaPRX54	Garb_10G022640.1	Chr10:111111191..111113493	972	323	35.66	8.8	Yes	chloroplast
GaPRX55	Garb_10G023850.1	Chr10:114239513..114240720	972	323	35.14	8.91	Yes	chloroplast
GaPRX56	Garb_10G023880.1	Chr10:114546095..114547758	909	302	33.25	10.38	Yes	vacuoble
GaPRX57	Garb_10G023890.1	Chr10:114547832..114549535	987	328	35.29	9.64	Yes	extracellular
GaPRX58	Garb_11G004950.1	Chr11:4156567..4157911	996	331	36.43	9.5	Yes	extracellular
GaPRX59	Garb_11G020400.1	Chr11:26553103..26554355	1005	334	36.93	8.59	Yes	extracellular
GaPRX60	Garb_11G024970.1	Chr11:55444779..55447611	972	323	35.53	4.65	Yes	chloroplast
GaPRX61	Garb_11G025380.1	Chr11:58867879..58870386	942	313	34.05	6.98	Yes	chloroplast
GaPRX62	Garb_11G029530.1	Chr11:104733127..104734174	957	318	34.96	10.43	Yes	vacuoble
GaPRX63	Garb_12G000750.1	Chr12:885409..886626	975	324	35.64	8.98	Yes	chloroplast
GaPRX64	Garb_12G000760.1	Chr12:894512..895656	975	324	35.64	8.98	Yes	extracellular
GaPRX65	Garb_12G000770.1	Chr12:900890..902158	975	324	35.64	8.98	Yes	extracellular
GaPRX66	Garb_12G000780.1	Chr12:905719..906939	975	324	35.64	8.98	Yes	chloroplast
GaPRX67	Garb_12G008160.1	Chr12:19466452..19467820	1056	351	38.83	7.99	No	chloroplast
GaPRX68	Garb_12G009600.1	Chr12:37020904..37022158	990	329	36.65	4.87	Yes	vacuoble
GaPRX69	Garb_12G020180.1	Chr12:103550709..103552492	1023	340	37.15	9.36	Yes	chloroplast
GaPRX70	Garb_12G020460.1	Chr12:104210944..104212239	1818	605	68.85	6.82	Yes	extracellular
GaPRX71	Garb_12G026560.1	Chr12:113727204..113728500	1014	337	37.88	6	Yes	vacuoble
GaPRX72	Garb_12G030130.1	Chr12:117112702..117114157	3411	1136	126.85	7.96	Yes	plasma
GaPRX73	Garb_12G031870.1	Chr12:118586823..118588751	972	323	35.58	8.88	Yes	chloroplast
GaPRX74	Garb_12G033440.1	Chr12:119899976..119900980	1005	334	37.14	7.72	Yes	extracellular
GaPRX75	Garb_13G000590.1	Chr13:524792..526890	978	325	35.42	9.01	Yes	chloroplast
GaPRX76	Garb_13G012700.1	Chr13:64716940..64718491	975	324	34.89	6.65	Yes	extracellular
GaPRX77	Garb_13G012710.1	Chr13:64736005..64737266	987	328	35.53	7.4	Yes	vacuoble
GaPRX78	Garb_13G012720.1	Chr13:64741303..64742565	987	328	35.52	7.36	Yes	chloroplast
GrPRX1	Gorai.001G001800.1	Chr01 : 166,392-168,271 :	996	331	36.42	8.94	Yes	extracellular
GrPRX2	Gorai.001G039200.1	Chr01 : 3653739-3655335 : +	1026	341	36.92	4.65	No	chloroplast
GrPRX3	Gorai.001G259400.1	Chr01 : 53,421,180-53,423,546 :	1026	341	37.69	8.37	Yes	chloroplast
GrPRX4	Gorai.001G271800.1	Chr01 : 54877951-54879434 : +	966	321	35.03	4.29	Yes	chloroplast
GrPRX5	Gorai.001G271900.1	Chr01 : 54879841-54881410 : +	975	324	35.42	7.24	Yes	extracellular
GrPRX6	Gorai.002G164800.1	Chr02 : 40106361-40107390 : -	996	331	36.92	8.18	Yes	chloroplast
GrPRX7	Gorai.002G165200.1	Chr02 : 40373651-40374646 : +	996	331	36.73	7.96	Yes	chloroplast
GrPRX8	Gorai.002G168400.1	Chr02 : 41920020-41921341 : -	969	322	34.69	7.92	Yes	chloroplast
GrPRX9	Gorai.002G208800.1	Chr02 : 55583491-55585673 : -	972	323	34.88	5.69	Yes	chloroplast
GrPRX10	Gorai.003G006600.1	Chr03 : 372535-374039 : +	954	317	34.26	9.27	Yes	Endoplasmic reticulum
GrPRX11	Gorai.003G029000.1	Chr03 : 2622708-2625287 : +	993	330	36	9.44	Yes	vacuoble
GrPRX12	Gorai.003G151700.1	Chr03 : 41929968-41932599 : -	969	322	34.6	9.83	Yes	extracellular
GrPRX13	Gorai.004G049000.1	Chr04 : 4484450-4485733 : -	1005	334	36.17	7.67	Yes	Chloroplast
GrPRX14	Gorai.004G049100.1	Chr04 : 4503942-4505252 : -	1005	334	35.69	8.54	Yes	chloroplast
GrPRX15	Gorai.004G049200.1	Chr04 : 4508302-4509387 : +	1005	334	35.74	8.54	Yes	chloroplast
GrPRX16	Gorai.004G093000.1	Chr04 : 13435625-13437698 : +	999	332	35.76	6.49	Yes	chloroplast
GrPRX17	Gorai.004G093200.1	Chr04 : 13708330-13709956 : -	1065	354	38.21	4.6	Yes	extracellular
GrPRX18	Gorai.004G098800.1	Chr04 : 16735410-16738973 : +	990	329	36.3	10.33	Yes	Nuclear
GrPRX19	Gorai.004G234900.1	Chr04 : 57273081-57274766 : +	966	321	34.58	5.68	Yes	Chloroplast
GrPRX20	Gorai.004G252800.1	Chr04 : 59023476-59024647 : +	945	314	34.22	9.47	Yes	chloroplast
GrPRX21	Gorai.004G265900.1	Chr04 : 60135667-60137258 : -	969	322	34.88	7.75	Yes	chloroplast
GrPRX22	Gorai.005G068200.1	Chr05 : 7299198-7300617 : +	993	330	35.7	4.13	Yes	extracellular
GrPRX23	Gorai.005G077600.1	Chr05 : 8891396-8894264 : +	1116	371	40.58	7.69	No	Mitochondrial.
GrPRX24	Gorai.005G126200.1	Chr05 : 28170634-28173071 : -	1020	339	37.95	8.3	Yes	chloroplast
GrPRX25	Gorai.005G148900.1	Chr05 : 40824145-40825861 : +	1008	335	36.72	5.03	Yes	extracellular
GrPRX26	Gorai.005G150500.1	Chr05 : 41752164-41753889 : +	987	328	35.92	9.32	Yes	vacuoble
GrPRX27	Gorai.005G150600.1	Chr05 : 41845848-41847613 : +	984	327	35.41	7.71	Yes	extracellular
GrPRX28	Gorai.006G074900.1	Chr06 : 29700116-29703396 : -	771	256	28	9.11	No	cytoplasm
GrPRX29	Gorai.006G143400.1	Chr06 : 40149364-40151033 : +	1020	339	35.97	4.95	Yes	chloroplast
GrPRX30	Gorai.006G168000.1	Chr06 : 42778855-42781289 : +	990	329	37.14	6.43	Yes	chloroplast
GrPRX31	Gorai.006G187600.1	Chr06 : 44449585-44450571 : -	987	328	36.06	6.85	Yes	extracellular
GrPRX32	Gorai.006G233800.1	Chr06 : 48235483-48236639 : -	951	316	34.58	10.15	Yes	chloroplast
GrPRX33	Gorai.006G233900.1	Chr06 : 48239119-48240279 : +	951	316	34.63	10.05	Yes	chloroplast
GrPRX34	Gorai.006G234100.1	Chr06 : 48242614-48243765 : -	921	306	33.34	8.89	Yes	chloroplast
GrPRX35	Gorai.007G049900.1	Chr07 : 3512343-3513968 : -	996	331	36.49	9.07	Yes	extracellular
GrPRX36	Gorai.007G065200.1	Chr07 : 4579530-4580773 : +	978	325	35.98	8.96	Yes	Endoplasmic reticulum
GrPRX37	Gorai.007G070800.1	Chr07 : 4994802-4996041 : +	967	318	34.98	9.53	No	Endoplasmic reticulum
GrPRX38	Gorai.007G199700.1	Chr07 : 20278508-20280127 : -	1005	334	36.88	8.59	Yes	extracellular
GrPRX39	Gorai.007G234600.1	Chr07 : 30577347-30580341 : +	972	323	35.63	4.65	Yes	chloroplast
GrPRX40	Gorai.007G238800.1	Chr07 : 32592918-32594395 : +	966	321	34.99	8.21	Yes	chloroplast
GrPRX41	Gorai.007G253300.1	Chr07 : 40697006-40698050 : -	957	318	35.04	10.46	Yes	chloroplast
GrPRX42	Gorai.008G007500.1	Chr08 : 882361-883681 : -	972	323	35.33	7.9	Yes	extracellular
GrPRX43	Gorai.008G007600.1	Chr08 : 898587-899855 : -	972	323	35.07	6.34	Yes	extracellular
GrPRX44	Gorai.008G007700.1	Chr08 : 904394-905787 : -	972	323	35.64	8.99	Yes	chloroplast
GrPRX45	Gorai.008G073800.1	Chr08 : 13245572-13247278 : +	984	327	36.26	7.68	Yes	vacuoble
GrPRX46	Gorai.008G080800.1	Chr08 : 15787962-15789978 : +	993	330	35.83	8.64	Yes	chloroplast
GrPRX47	Gorai.008G090200.1	Chr08 : 21319074-21320586 : +	990	329	36.45	4.72	Yes	extracellular
GrPRX48	Gorai.008G172200.1	Chr08 : 44722321-44724384 : -	1023	340	37.09	9.36	No	chloroplast
GrPRX49	Gorai.008G174200.1	Chr08 : 45008652-45010374 : -	1011	336	37.1	4.92	Yes	extracellular
GrPRX50	Gorai.008G228500.1	Chr08 : 51467021-51468716 : -	1002	333	37.48	5.48	Yes	vacuoble
GrPRX51	Gorai.008G264300.1	Chr08 : 54393226-54394916 : +	990	329	35.75	7.93	Yes	plasma
GrPRX52	Gorai.008G281600.1	Chr08 : 55816191-55818253 : -	1006	335	37.04	8.87	Yes	chloroplast
GrPRX53	Gorai.008G298000.1	Chr08 : 57043343-57045011 : -	1005	334	37.09	7.72	Yes	extracellular
GrPRX54	Gorai.009G017700.1	Chr09 : 1400322-1402015 : +	978	325	35.11	7.72	Yes	chloroplast
GrPRX55	Gorai.009G064700.1	Chr09 : 4599708-4601443 : +	1002	333	36.14	5.04	No	chloroplast
GrPRX56	Gorai.009G084400.1	Chr09 : 6151158-6152554 : -	1014	337	36.09	6.73	Yes	extracellular
GrPRX57	Gorai.009G165100.1	Chr09 : 12666793-12669151 : +	1062	353	38.41	9.63	No	chloroplast
GrPRX58	Gorai.009G178400.1	Chr09 : 13776673-13778817 : -	999	332	37.67	8.69	Yes	cytoplasm
GrPRX59	Gorai.009G192200.1	Chr09 : 14789972-14791408 : +	951	316	34.2	9.46	Yes	Endoplasmic reticulum
GrPRX60	Gorai.009G198700.1	Chr09 : 15380563-15382302 : +	1050	349	37.77	7.98	Yes	Endoplasmic reticulum
GrPRX61	Gorai.009G295200.1	Chr09 : 25739756-25741294 : -	972	323	34.86	8.39	Yes	chloroplast
GrPRX62	Gorai.009G361800.1	Chr09 : 47660591-47662245 : +	951	316	33.69	8.33	Yes	chloroplast
GrPRX63	Gorai.009G419100.1	Chr09 : 65292607-65294845 : +	987	328	37.21	6.77	Yes	extracellular
GrPRX64	Gorai.010G001900.1	Chr10 : 73452-74986 : +	954	317	34.32	9.45	Yes	vacuoble
GrPRX65	Gorai.010G127400.1	Chr10 : 27239826-27241689 : -	1036	346	37.21	4.45	Yes	Endoplasmic reticulum
GrPRX66	Gorai.010G131800.1	Chr10 : 28981956-28985381 : +	1050	349	37.9	8.38	Yes	chloroplast
GrPRX67	Gorai.011G069800.1	Chr11 : 6245706-6246906 : -	1038	345	38.21	6.11	Yes	extracellular
GrPRX68	Gorai.011G107800.1	Chr11 : 12632775-12634611 : +	993	330	36	9.99	Yes	chloroplast
GrPRX69	Gorai.011G129800.1	Chr11 : 19105019-19106254 : -	954	317	34.54	9.24	Yes	chloroplast
GrPRX70	Gorai.011G129900.1	Chr11 : 19167211-19169565 : -	972	323	34.01	7.93	Yes	chloroplast
GrPRX71	Gorai.011G184500.1	Chr11 : 43855155-43856741 : -	993	330	36.08	8.98	Yes	chloroplast
GrPRX72	Gorai.011G184600.1	Chr11 : 43875274-43877711 : -	984	327	35.74	10.04	Yes	extracellular
GrPRX73	Gorai.011G200600.1	Chr11 : 48602180-48604682 : +	972	323	35.7	8.63	Yes	chloroplast
GrPRX74	Gorai.011G211100.1	Chr11 : 50861358-50862719 : +	963	320	34.64	8.96	Yes	chloroplast
GrPRX75	Gorai.011G211300.1	Chr11 : 51051691-51053513 : +	972	323	35.6	10.4	Yes	vacuoble
GrPRX76	Gorai.011G211400.1	Chr11 : 51053730-51055220 : +	987	328	35.24	9.53	Yes	extracellular
GrPRX77	Gorai.012G016200.1	Chr12 : 1841548-1843432 : -	1014	337	36.05	9.2	Yes	chloroplast
GrPRX78	Gorai.012G046400.1	Chr12 : 5786828-5788600 : -	972	323	35.71	5.22	No	extracellular
GrPRX79	Gorai.012G059300.1	Chr12 : 8310005-8310970 : -	966	321	35.5	9.01	Yes	extracellular
GrPRX80	Gorai.012G086200.1	Chr12 : 14700172-14706444 : -	978	325	35.56	8.95	Yes	chloroplast
GrPRX81	Gorai.012G086300.1	Chr12 : 14707094-14709280 : -	978	325	35.4	4.53	Yes	plasma
GrPRX82	Gorai.012G150400.1	Chr12 : 32420070-32422371 : -	1020	339	37.39	7.06	No	chloroplast
GrPRX83	Gorai.013G005800.1	Chr13 : 410298-412852 : +	1068	355	39	9.69	No	cytoplasm
GrPRX84	Gorai.013G099400.1	Chr13 : 17901788-17903697 : +	978	325	34.91	6.76	Yes	extracellular
GrPRX85	Gorai.013G099500.1	Chr13 : 17916399-17917578 : -	618	205	21.09	6.76	Yes	vacuoble
GrPRX86	Gorai.013G099600.1	Chr13 : 17919161-17920721 : +	987	328	35.46	7.4	Yes	chloroplast
GrPRX87	Gorai.N001200.1	scaffold_14 : 210153-211264 : +	939	312	34.27	9.72	Yes	chloroplast
GrPRX88	Gorai.N001300.1	scaffold_14 : 220845-221952 : -	825	274	30.1	9.65	Yes	plasma
GrPRX89	Gorai.N001400.1	scaffold_14 : 294268-295406 : +	951	316	34.58	9.02	Yes	chloroplast
