# Supplementary material for: Genome-wide identification and functional analysis of class III peroxidases in Gossypium hirsutum
Source: PeerJ. 2022 Jul 1;10:e13635. doi: 10.7717/peerj.13635 (PMC9252181; doi:10.7717/peerj.13635)
Supplement: Supplemental Information 6 [file peerj-10-13635-s006.xlsx]

## Sheet: Sheet1
	MeJA responsive element		ABA responsive element	drought responsive element	anaerobic induced response element	circadian control element	defence and stress response element	endosperm expression element	auxin responsive element	SA responsive element	meristem expression element	low-temperature responsive element	gibberellin responsive element		seed-specific element	cell cycle element
	TGACG-motif	CGTCA-motif	ABRE	MBS	ARE	circadian	TC-rich repeats	GCN4_motif	AuxRR-core	TCA-element	CAT-box	LTR	GARE-motif	p-box	RY-element	MSA-like
GhPRX1	1	1			1				1			1
GhPRX2	1	1	2		3			1	1	1	1	3
GhPRX3			3	1	2	1	1			1	1
GhPRX4	1	1	1		2	1				1		1		1
GhPRX5	1	1	1								1
GhPRX6	1	1	4		2						1	1
GhPRX7	1	1		1										1
GhPRX8	1	1	2	1	1				1			1
GhPRX9				1	4	1	1			1			1	1
GhPRX10	1	1		1	2		1		1			1	1	2
GhPRX11	1	1	1		1		1		1			1
GhPRX12			4		2				1		1	1	1	1
GhPRX13	1	1	2	1	5									1
GhPRX14					1					1	1
GhPRX15	2	2	2		1		1		1	2	1	1
GhPRX16	1	1			1						1					1
GhPRX17	2	2			2							1	1	1
GhPRX18			2	1	1					1	1	1		1
GhPRX19	1	1	2
GhPRX20	3	3			1						1	1		1
GhPRX21	2	2	1		2	1					2		1
GhPRX22								1				1	1	1
GhPRX23	3	3	2	1	1							2		2
GhPRX24	1	1	3	2	4	1			1
GhPRX25	2	2	1		1					1
GhPRX26	2	2	3	2	3		1			1
GhPRX27	2	2	4		1							1			1
GhPRX28			1	1					1
GhPRX29	2	2	2	1	1	1			1	1
GhPRX30	1	1	2		3					2	1			2
GhPRX31														1
GhPRX32	1	1			5	1	2			1	2	1
GhPRX33	1	1	2		3		1
GhPRX34			2		1		2		1	1			1
GhPRX35			3		3	1						1
GhPRX36	1	1	2								2	1			1
GhPRX37				2								1			1
GhPRX38	1	1	1
GhPRX39			1	2	5						1	1
GhPRX40			1		3			1			1	1
GhPRX41			1					1
GhPRX42				2	3			1			1	1
GhPRX43	2	2	2	1	2	1	1		1		1			1
GhPRX44			1		1	1	2
GhPRX45			2
GhPRX46	1	1		1	3		1	1			1	1		1
GhPRX47	2	2	6	1	2
GhPRX48	1	1	2	1	2			1		1				1	4
GhPRX49
GhPRX50	3	3	1		1		2						1	1
GhPRX51			1	2			1					2
GhPRX52	1	1	2		2	1	1	1
GhPRX53	1	1	3		4			1	1						2
GhPRX54			1		2			1	1						2
GhPRX55	1	1	3	2	1		1			1				2
GhPRX56	2	2	2		2			1	1						2
GhPRX57			3		1									1
GhPRX58			2		1	1						1
GhPRX59	1	1	1	2	2						1		1
GhPRX60	1	1		2	3						1
GhPRX61	1	1	1		1						1
GhPRX62			3		1		1							1
GhPRX63										1	1	2
GhPRX64	4	4	1	1	1	1				2
GhPRX65			3	1	3		1			2			1
GhPRX66	1	1	3	1	3			1		2
GhPRX67			4			1	1			3		1
GhPRX68	1	1	3	1	1			1		1		1		1
GhPRX69			2	1	4		1			1	1	1		1
GhPRX70			2	1	1		1			1
GhPRX71	2	2	3	2	1					2
GhPRX72					2		1			1		1	1
GhPRX73			1	2	3							1		1	2
GhPRX74			1							1		1
GhPRX75	2	2	2		1
GhPRX76	1	1	1	2	2		1				2	1		1		1
GhPRX77					2		1				1
GhPRX78				1					1	2	1	1	1	2
GhPRX79			4		1	1				3
GhPRX80	3	3	4	2	2			1					1
GhPRX81	1	1	1		2					1
GhPRX82					1	1	1			1	1
GhPRX83	1	1	3	1	1			2
GhPRX84			1	1						1			1
GhPRX85	2	2		1		1				1	1			1
GhPRX86	1	1	3		4		1		1
GhPRX87			3		3	1
GhPRX88			3		1			1				1		1
GhPRX89	2	2	1	1		1	1		1	1	1			1
GhPRX90			1		3		1		1			3
GhPRX91	1	1	4		1		1			1		1
GhPRX92	1	1	3	2	4						1	1		1
GhPRX93	2	2	1		2				2		1	1		1
GhPRX94	3	3	1	1	3	2										1
GhPRX95			1					1		2			1
GhPRX96	1	1	4	1	2		1	1		1	1			2
GhPRX97	1	1	1	1	2	1	1		1			1		1
GhPRX98	1	1	3		2	1	1		1			1
GhPRX99	2	2	6	2	1			1	2
GhPRX100					1										1
GhPRX101	1	1		2	1	1								1
GhPRX102			1		4					1		1
GhPRX103	2	2	5	1							2	1	1
GhPRX104	2	2	4		5	1	1				2
GhPRX105	1	1	2	1	1					2	1			1
GhPRX106	1	1	4		1						1			1
GhPRX107	3	3	3	1
GhPRX108			1	1	3				2	1						1
GhPRX109	4	4	1									1		2		1
GhPRX110	2	2		1	3
GhPRX111	1	1	4		1			1		1				1
GhPRX112	2	2	6	1	3	1	1	1				1
GhPRX113			1			1	3		1	1
GhPRX114			1		2					3	1
GhPRX115					1					1		2
GhPRX116	1	1			5	1	2				2
GhPRX117			1				1	1					1			1
GhPRX118	1	1	1			1							1	2	1
GhPRX119			2		1				1	1			1
GhPRX120					2		1		1		1			1	1
GhPRX121	1	1	3	1	1		1					1			1
GhPRX122	2	2	1	1	2						2	3		1
GhPRX123				1	1		1				1	1	1	2
GhPRX124			2		3						1
GhPRX125			2		1	1	1				1	3
GhPRX126	1	1		1	3					1
GhPRX127	2	2	4		2		1
GhPRX128	1	1	2		1		1						1	1
GhPRX129				2	2			2		1					1
GhPRX130	2	2	1	1	1		1						1
GhPRX131	1	1	3	2								1
GhPRX132	4	4	5	1	2	1	1				2
GhPRX133			6	1	4					1		1
GhPRX134				1	1			1	1						1
GhPRX135	1	1	4	1			1			1		2		2
GhPRX136			3	2						1	1	3		1
GhPRX137	2	2	2							1				1
GhPRX138	1	1	4			1		1
GhPRX139	1	1	1
GhPRX140			2		1		1		1		1			1
GhPRX141	1	1	2								1
GhPRX142					3					1	1
GhPRX143			6		1						1	2
GhPRX144				2		1	1				1	3		1
GhPRX145	5	5	3	1	3	1				2
GhPRX146	8	8	9	1	3		1			3			1
GhPRX147	1	1	2		4					1
GhPRX148			2		1	1	1			2	1	2
GhPRX149			1	1	1					2	1			2
GhPRX150			2	1	1		3			1
GhPRX151	1	1	3		1	1				1
GhPRX152	1	1	1	1	4					1
GhPRX153					2
GhPRX154					3		1					1
GhPRX155			1	2	2					1	1	2		1
GhPRX156					4						1	1
GhPRX157	1	1	3	1										1
GhPRX158	1	1	2		1					2
GhPRX159	1	1	3	1										1
GhPRX160				3	3		1			2		1		1
GhPRX161					2		1			1	2
GhPRX162			2	1		1			1	1	1	1	1	2
GhPRX163			4		1	1				2		1
GhPRX164				2	2	1		1					1
GhPRX165	1	1	2		1			2
GhPRX166	1	1	1	1	2		2	1		1	1	1
