# Supplementary material for: Genome-wide identification and functional analysis of class III peroxidases in Gossypium hirsutum
Source: PeerJ. 2022 Jul 1;10:e13635. doi: 10.7717/peerj.13635 (PMC9252181; doi:10.7717/peerj.13635)
Supplement: Supplemental Information 7 [file peerj-10-13635-s007.xlsx]

## Sheet: Sheet1
Table S7. The GO and KEGG enrichment analysis of PRXS genes.
Molecular function(MF)	GO ID	GO Term	GeneRatio	BgRatio	Pvalue	FDR	Gene ID
	GO:0004601	peroxidase activity	138/151 (91.39%)	280/31303 (0.89%)	6.46361e-283	1.03418e-281	Ghir_A01G013780;Ghir_A01G016980;Ghir_A02G005650;Ghir_A02G006580;Ghir_A02G009350;Ghir_A02G013970;Ghir_A02G016820;Ghir_A02G018930;Ghir_A03G003150;Ghir_A03G003160;Ghir_A03G012130;Ghir_A03G012260;Ghir_A03G012270;Ghir_A04G004660;Ghir_A04G008350;Ghir_A05G001710;Ghir_A05G016230;Ghir_A05G018790;Ghir_A05G019420;Ghir_A05G028580;Ghir_A05G034970;Ghir_A05G037420;Ghir_A05G038670;Ghir_A05G041410;Ghir_A06G000160…
	GO:0016684	oxidoreductase activity, acting on peroxide as acceptor	138/151 (91.39%)	284/31303 (0.92%)	6.79482e-281	5.43586e-280	Ghir_A01G013780;Ghir_A01G016980;Ghir_A02G005650;Ghir_A02G006580;Ghir_A02G009350;Ghir_A02G013970;Ghir_A02G016820;Ghir_A02G018930;Ghir_A03G003150;Ghir_A03G003160;Ghir_A03G012130;Ghir_A03G012260;Ghir_A03G012270;Ghir_A04G004660;Ghir_A04G008350;Ghir_A05G001710;Ghir_A05G016230;Ghir_A05G018790;Ghir_A05G019420;Ghir_A05G028580;Ghir_A05G034970;Ghir_A05G037420;Ghir_A05G038670;Ghir_A05G041410;Ghir_A06G000160…
	GO:0016209	antioxidant activity	138/151 (91.39%)	344/31303 (1.1%)	1.2677e-266	6.76107e-266	Ghir_A01G013780;Ghir_A01G016980;Ghir_A02G005650;Ghir_A02G006580;Ghir_A02G009350;Ghir_A02G013970;Ghir_A02G016820;Ghir_A02G018930;Ghir_A03G003150;Ghir_A03G003160;Ghir_A03G012130;Ghir_A03G012260;Ghir_A03G012270;Ghir_A04G004660;Ghir_A04G008350;Ghir_A05G001710;Ghir_A05G016230;Ghir_A05G018790;Ghir_A05G019420;Ghir_A05G028580;Ghir_A05G034970;Ghir_A05G037420;Ghir_A05G038670;Ghir_A05G041410;Ghir_A06G000160…
	GO:0020037	heme binding	136/151 (90.07%)	652/31303 (2.08%)	1.05877e-215	4.23508e-215	Ghir_A01G013780;Ghir_A01G016980;Ghir_A02G005650;Ghir_A02G006580;Ghir_A02G009350;Ghir_A02G013970;Ghir_A02G016820;Ghir_A02G018930;Ghir_A03G003150;Ghir_A03G003160;Ghir_A03G012130;Ghir_A03G012260;Ghir_A03G012270;Ghir_A04G004660;Ghir_A04G008350;Ghir_A05G001710;Ghir_A05G016230;Ghir_A05G018790;Ghir_A05G019420;Ghir_A05G028580;Ghir_A05G034970;Ghir_A05G037420;Ghir_A05G038670;Ghir_A05G041410;Ghir_A06G000160…
	GO:0046906	tetrapyrrole binding	136/151 (90.07%)	724/31303 (2.31%)	7.91853e-209	2.53393e-208	Ghir_A01G013780;Ghir_A01G016980;Ghir_A02G005650;Ghir_A02G006580;Ghir_A02G009350;Ghir_A02G013970;Ghir_A02G016820;Ghir_A02G018930;Ghir_A03G003150;Ghir_A03G003160;Ghir_A03G012130;Ghir_A03G012260;Ghir_A03G012270;Ghir_A04G004660;Ghir_A04G008350;Ghir_A05G001710;Ghir_A05G016230;Ghir_A05G018790;Ghir_A05G019420;Ghir_A05G028580;Ghir_A05G034970;Ghir_A05G037420;Ghir_A05G038670;Ghir_A05G041410;Ghir_A06G000160…
	GO:0016491	oxidoreductase activity	151/151 (100%)	4699/31303 (15.01%)	5.47863e-126	1.46097e-125	Ghir_A01G013500;Ghir_A01G013780;Ghir_A01G016980;Ghir_A02G005650;Ghir_A02G006580;Ghir_A02G009350;Ghir_A02G013970;Ghir_A02G016820;Ghir_A02G018930;Ghir_A03G003150;Ghir_A03G003160;Ghir_A03G012130;Ghir_A03G012260;Ghir_A03G012270;Ghir_A04G004660;Ghir_A04G008350;Ghir_A04G013140;Ghir_A05G001710;Ghir_A05G016230;Ghir_A05G018790;Ghir_A05G019420;Ghir_A05G028580;Ghir_A05G034970;Ghir_A05G037420;Ghir_A05G038670…
	GO:0046872	metal ion binding	135/151 (89.4%)	5757/31303 (18.39%)	9.43194e-81	2.16e-80	Ghir_A01G013780;Ghir_A01G016980;Ghir_A02G005650;Ghir_A02G006580;Ghir_A02G009350;Ghir_A02G013970;Ghir_A02G016820;Ghir_A02G018930;Ghir_A03G003150;Ghir_A03G003160;Ghir_A03G012130;Ghir_A03G012260;Ghir_A03G012270;Ghir_A04G004660;Ghir_A04G008350;Ghir_A05G001710;Ghir_A05G016230;Ghir_A05G018790;Ghir_A05G019420;Ghir_A05G028580;Ghir_A05G034970;Ghir_A05G037420;Ghir_A05G038670;Ghir_A05G041410;Ghir_A06G000160…
	GO:0043169	cation binding	135/151 (89.4%)	5875/31303 (18.77%)	1.40026e-79	2.80052e-79	Ghir_A01G013780;Ghir_A01G016980;Ghir_A02G005650;Ghir_A02G006580;Ghir_A02G009350;Ghir_A02G013970;Ghir_A02G016820;Ghir_A02G018930;Ghir_A03G003150;Ghir_A03G003160;Ghir_A03G012130;Ghir_A03G012260;Ghir_A03G012270;Ghir_A04G004660;Ghir_A04G008350;Ghir_A05G001710;Ghir_A05G016230;Ghir_A05G018790;Ghir_A05G019420;Ghir_A05G028580;Ghir_A05G034970;Ghir_A05G037420;Ghir_A05G038670;Ghir_A05G041410;Ghir_A06G000160…
	GO:0043167	ion binding	135/151 (89.4%)	10813/31303 (34.54%)	5.45446e-45	9.69682e-45	Ghir_A01G013780;Ghir_A01G016980;Ghir_A02G005650;Ghir_A02G006580;Ghir_A02G009350;Ghir_A02G013970;Ghir_A02G016820;Ghir_A02G018930;Ghir_A03G003150;Ghir_A03G003160;Ghir_A03G012130;Ghir_A03G012260;Ghir_A03G012270;Ghir_A04G004660;Ghir_A04G008350;Ghir_A05G001710;Ghir_A05G016230;Ghir_A05G018790;Ghir_A05G019420;Ghir_A05G028580;Ghir_A05G034970;Ghir_A05G037420;Ghir_A05G038670;Ghir_A05G041410;Ghir_A06G000160…
	GO:1901363	heterocyclic compound binding	136/151 (90.07%)	11660/31303 (37.25%)	5.39691e-42	8.63506e-42	Ghir_A01G013780;Ghir_A01G016980;Ghir_A02G005650;Ghir_A02G006580;Ghir_A02G009350;Ghir_A02G013970;Ghir_A02G016820;Ghir_A02G018930;Ghir_A03G003150;Ghir_A03G003160;Ghir_A03G012130;Ghir_A03G012260;Ghir_A03G012270;Ghir_A04G004660;Ghir_A04G008350;Ghir_A05G001710;Ghir_A05G016230;Ghir_A05G018790;Ghir_A05G019420;Ghir_A05G028580;Ghir_A05G034970;Ghir_A05G037420;Ghir_A05G038670;Ghir_A05G041410;Ghir_A06G000160…
	GO:0097159	organic cyclic compound binding	136/151 (90.07%)	11675/31303 (37.3%)	6.36216e-42	9.25405e-42	Ghir_A01G013780;Ghir_A01G016980;Ghir_A02G005650;Ghir_A02G006580;Ghir_A02G009350;Ghir_A02G013970;Ghir_A02G016820;Ghir_A02G018930;Ghir_A03G003150;Ghir_A03G003160;Ghir_A03G012130;Ghir_A03G012260;Ghir_A03G012270;Ghir_A04G004660;Ghir_A04G008350;Ghir_A05G001710;Ghir_A05G016230;Ghir_A05G018790;Ghir_A05G019420;Ghir_A05G028580;Ghir_A05G034970;Ghir_A05G037420;Ghir_A05G038670;Ghir_A05G041410;Ghir_A06G000160…
	GO:0005488	binding	151/151 (100%)	18509/31303 (59.17%)	2.70563e-35	3.6075e-35	Ghir_A01G013500;Ghir_A01G013780;Ghir_A01G016980;Ghir_A02G005650;Ghir_A02G006580;Ghir_A02G009350;Ghir_A02G013970;Ghir_A02G016820;Ghir_A02G018930;Ghir_A03G003150;Ghir_A03G003160;Ghir_A03G012130;Ghir_A03G012260;Ghir_A03G012270;Ghir_A04G004660;Ghir_A04G008350;Ghir_A04G013140;Ghir_A05G001710;Ghir_A05G016230;Ghir_A05G018790;Ghir_A05G019420;Ghir_A05G028580;Ghir_A05G034970;Ghir_A05G037420;Ghir_A05G038670…
	GO:0003824	catalytic activity	151/151 (100%)	20372/31303 (65.08%)	5.57125e-29	6.85692e-29	Ghir_A01G013500;Ghir_A01G013780;Ghir_A01G016980;Ghir_A02G005650;Ghir_A02G006580;Ghir_A02G009350;Ghir_A02G013970;Ghir_A02G016820;Ghir_A02G018930;Ghir_A03G003150;Ghir_A03G003160;Ghir_A03G012130;Ghir_A03G012260;Ghir_A03G012270;Ghir_A04G004660;Ghir_A04G008350;Ghir_A04G013140;Ghir_A05G001710;Ghir_A05G016230;Ghir_A05G018790;Ghir_A05G019420;Ghir_A05G028580;Ghir_A05G034970;Ghir_A05G037420;Ghir_A05G038670…
Cellular component(CC)	GO:0009505	plant-type cell wall	24/46 (52.17%)	357/21288 (1.68%)	6.35903e-31	1.52617e-29	Ghir_A02G006580;Ghir_A02G018930;Ghir_A03G012270;Ghir_A05G018790;Ghir_A05G037420;Ghir_A06G000160;Ghir_A06G011000;Ghir_A06G022890;Ghir_A07G023450;Ghir_A08G008430;Ghir_A13G025050;Ghir_A13G025060;Ghir_A13G025070;Ghir_D02G006990;Ghir_D02G013820;Ghir_D03G000640;Ghir_D05G018800;Ghir_D06G012120;Ghir_D06G012460;Ghir_D07G023530;Ghir_D08G008490;Ghir_D13G009170;Ghir_D13G009180;Ghir_D13G009200
	GO:0030312	external encapsulating structure	25/46 (54.35%)	923/21288 (4.34%)	1.79446e-22	1.43557e-21	Ghir_A02G006580;Ghir_A02G018930;Ghir_A03G012270;Ghir_A05G018790;Ghir_A05G037420;Ghir_A06G000160;Ghir_A06G011000;Ghir_A06G022890;Ghir_A07G023450;Ghir_A08G008410;Ghir_A08G008430;Ghir_A13G025050;Ghir_A13G025060;Ghir_A13G025070;Ghir_D02G006990;Ghir_D02G013820;Ghir_D03G000640;Ghir_D05G018800;Ghir_D06G012120;Ghir_D06G012460;Ghir_D07G023530;Ghir_D08G008490;Ghir_D13G009170;Ghir_D13G009180;Ghir_D13G009200
	GO:0005618	cell wall	25/46 (54.35%)	923/21288 (4.34%)	1.79446e-22	1.43557e-21	Ghir_A02G006580;Ghir_A02G018930;Ghir_A03G012270;Ghir_A05G018790;Ghir_A05G037420;Ghir_A06G000160;Ghir_A06G011000;Ghir_A06G022890;Ghir_A07G023450;Ghir_A08G008410;Ghir_A08G008430;Ghir_A13G025050;Ghir_A13G025060;Ghir_A13G025070;Ghir_D02G006990;Ghir_D02G013820;Ghir_D03G000640;Ghir_D05G018800;Ghir_D06G012120;Ghir_D06G012460;Ghir_D07G023530;Ghir_D08G008490;Ghir_D13G009170;Ghir_D13G009180;Ghir_D13G009200
	GO:0005576	extracellular region	21/46 (45.65%)	1135/21288 (5.33%)	2.96929e-15	1.78157e-14	Ghir_A01G016980;Ghir_A02G009350;Ghir_A05G019420;Ghir_A06G011000;Ghir_A08G008430;Ghir_A09G013730;Ghir_A10G015080;Ghir_A10G017680;Ghir_A11G021660;Ghir_A12G008420;Ghir_D01G018530;Ghir_D02G011420;Ghir_D03G015870;Ghir_D05G019450;Ghir_D06G012120;Ghir_D08G008490;Ghir_D09G013210;Ghir_D10G012480;Ghir_D10G019140;Ghir_D11G022730;Ghir_D12G008190
	GO:0071944	cell periphery	25/46 (54.35%)	4159/21288 (19.54%)	1.61133e-07	7.73437e-07	Ghir_A02G006580;Ghir_A02G018930;Ghir_A03G012270;Ghir_A05G018790;Ghir_A05G037420;Ghir_A06G000160;Ghir_A06G011000;Ghir_A06G022890;Ghir_A07G023450;Ghir_A08G008410;Ghir_A08G008430;Ghir_A13G025050;Ghir_A13G025060;Ghir_A13G025070;Ghir_D02G006990;Ghir_D02G013820;Ghir_D03G000640;Ghir_D05G018800;Ghir_D06G012120;Ghir_D06G012460;Ghir_D07G023530;Ghir_D08G008490;Ghir_D13G009170;Ghir_D13G009180;Ghir_D13G009200
	GO:0005773	vacuole	8/46 (17.39%)	1212/21288 (5.69%)	0.00407024	0.016281	Ghir_A02G006580;Ghir_A06G011000;Ghir_A06G022890;Ghir_A08G008430;Ghir_D02G006990;Ghir_D06G012120;Ghir_D06G012460;Ghir_D08G008490
Biological process(BP)	GO:0006979	response to oxidative stress	130/139 (93.53%)	696/29822 (2.33%)	8.29676e-205	1.86677e-202	Ghir_A01G013780;Ghir_A01G016980;Ghir_A02G005650;Ghir_A02G006580;Ghir_A02G009350;Ghir_A02G013970;Ghir_A02G016820;Ghir_A02G018930;Ghir_A03G003150;Ghir_A03G003160;Ghir_A03G012130;Ghir_A03G012260;Ghir_A03G012270;Ghir_A04G004660;Ghir_A04G008350;Ghir_A05G001710;Ghir_A05G016230;Ghir_A05G018790;Ghir_A05G019420;Ghir_A05G028580;Ghir_A05G034970;Ghir_A05G037420;Ghir_A05G038670;Ghir_A05G041410;Ghir_A06G000160…
	GO:0055114	oxidation-reduction process	135/139 (97.12%)	3990/29822 (13.38%)	1.3748e-112	1.54665e-110	Ghir_A01G013780;Ghir_A01G016980;Ghir_A02G005650;Ghir_A02G006580;Ghir_A02G009350;Ghir_A02G013970;Ghir_A02G016820;Ghir_A02G018930;Ghir_A03G003150;Ghir_A03G003160;Ghir_A03G012130;Ghir_A03G012260;Ghir_A03G012270;Ghir_A04G004660;Ghir_A04G008350;Ghir_A05G001710;Ghir_A05G016230;Ghir_A05G018790;Ghir_A05G019420;Ghir_A05G028580;Ghir_A05G034970;Ghir_A05G037420;Ghir_A05G038670;Ghir_A05G041410;Ghir_A06G000160…
	GO:0006950	response to stress	133/139 (95.68%)	4525/29822 (15.17%)	7.95285e-101	5.96464e-99	Ghir_A01G013780;Ghir_A01G016980;Ghir_A02G005650;Ghir_A02G006580;Ghir_A02G009350;Ghir_A02G013970;Ghir_A02G016820;Ghir_A02G018930;Ghir_A03G003150;Ghir_A03G003160;Ghir_A03G012130;Ghir_A03G012260;Ghir_A03G012270;Ghir_A04G004660;Ghir_A04G008350;Ghir_A05G001710;Ghir_A05G016230;Ghir_A05G018790;Ghir_A05G019420;Ghir_A05G028580;Ghir_A05G034970;Ghir_A05G037420;Ghir_A05G038670;Ghir_A05G041410;Ghir_A06G000160…
	GO:0050896	response to stimulus	134/139 (96.4%)	8561/29822 (28.71%)	8.54216e-66	4.80497e-64	Ghir_A01G013780;Ghir_A01G016980;Ghir_A02G005650;Ghir_A02G006580;Ghir_A02G009350;Ghir_A02G013970;Ghir_A02G016820;Ghir_A02G018930;Ghir_A03G003150;Ghir_A03G003160;Ghir_A03G012130;Ghir_A03G012260;Ghir_A03G012270;Ghir_A04G004660;Ghir_A04G008350;Ghir_A05G001710;Ghir_A05G016230;Ghir_A05G018790;Ghir_A05G019420;Ghir_A05G028580;Ghir_A05G034970;Ghir_A05G037420;Ghir_A05G038670;Ghir_A05G041410;Ghir_A06G000160…
	GO:0044710	single-organism metabolic process	137/139 (98.56%)	10956/29822 (36.74%)	5.99222e-57	2.6965e-55	Ghir_A01G013780;Ghir_A01G016980;Ghir_A02G005650;Ghir_A02G006580;Ghir_A02G009350;Ghir_A02G013970;Ghir_A02G016820;Ghir_A02G018930;Ghir_A03G003150;Ghir_A03G003160;Ghir_A03G012130;Ghir_A03G012260;Ghir_A03G012270;Ghir_A04G004660;Ghir_A04G008350;Ghir_A05G001710;Ghir_A05G016230;Ghir_A05G018790;Ghir_A05G019420;Ghir_A05G028580;Ghir_A05G034970;Ghir_A05G037420;Ghir_A05G038670;Ghir_A05G041410;Ghir_A06G000160…
	GO:0044699	single-organism process	137/139 (98.56%)	18253/29822 (61.21%)	7.55326e-27	2.83247e-25	Ghir_A01G013780;Ghir_A01G016980;Ghir_A02G005650;Ghir_A02G006580;Ghir_A02G009350;Ghir_A02G013970;Ghir_A02G016820;Ghir_A02G018930;Ghir_A03G003150;Ghir_A03G003160;Ghir_A03G012130;Ghir_A03G012260;Ghir_A03G012270;Ghir_A04G004660;Ghir_A04G008350;Ghir_A05G001710;Ghir_A05G016230;Ghir_A05G018790;Ghir_A05G019420;Ghir_A05G028580;Ghir_A05G034970;Ghir_A05G037420;Ghir_A05G038670;Ghir_A05G041410;Ghir_A06G000160…
	GO:0008152	metabolic process	137/139 (98.56%)	22233/29822 (74.55%)	1.9777e-15	6.35689e-14	Ghir_A01G013780;Ghir_A01G016980;Ghir_A02G005650;Ghir_A02G006580;Ghir_A02G009350;Ghir_A02G013970;Ghir_A02G016820;Ghir_A02G018930;Ghir_A03G003150;Ghir_A03G003160;Ghir_A03G012130;Ghir_A03G012260;Ghir_A03G012270;Ghir_A04G004660;Ghir_A04G008350;Ghir_A05G001710;Ghir_A05G016230;Ghir_A05G018790;Ghir_A05G019420;Ghir_A05G028580;Ghir_A05G034970;Ghir_A05G037420;Ghir_A05G038670;Ghir_A05G041410;Ghir_A06G000160…
	GO:0009269	response to desiccation	8/139 (5.76%)	74/29822 (0.25%)	2.11441e-09	5.94677e-08	Ghir_A03G012270;Ghir_A13G025050;Ghir_A13G025060;Ghir_A13G025070;Ghir_D02G013820;Ghir_D13G009170;Ghir_D13G009180;Ghir_D13G009200
	GO:0042538	hyperosmotic salinity response	8/139 (5.76%)	136/29822 (0.46%)	2.59155e-07	6.47887e-06	Ghir_A03G012270;Ghir_A13G025050;Ghir_A13G025060;Ghir_A13G025070;Ghir_D02G013820;Ghir_D13G009170;Ghir_D13G009180;Ghir_D13G009200
	GO:0045926	negative regulation of growth	4/139 (2.88%)	14/29822 (0.05%)	4.36293e-07	9.81659e-06	Ghir_A06G011000;Ghir_A08G008430;Ghir_D06G012120;Ghir_D08G008490
	GO:0002215	defense response to nematode	2/139 (1.44%)	2/29822 (0.01%)	2.15692e-05	0.000434873	Ghir_A09G013730;Ghir_D09G013210
	GO:0006972	hyperosmotic response	8/139 (5.76%)	249/29822 (0.83%)	2.31932e-05	0.000434873	Ghir_A03G012270;Ghir_A13G025050;Ghir_A13G025060;Ghir_A13G025070;Ghir_D02G013820;Ghir_D13G009170;Ghir_D13G009180;Ghir_D13G009200
	GO:0010043	response to zinc ion	4/139 (2.88%)	46/29822 (0.15%)	6.33517e-05	0.00109647	Ghir_A06G011000;Ghir_A08G008430;Ghir_D06G012120;Ghir_D08G008490
	GO:0042744	hydrogen peroxide catabolic process	5/139 (3.6%)	91/29822 (0.31%)	6.89907e-05	0.00110878	Ghir_A09G013730;Ghir_A10G015080;Ghir_D03G015870;Ghir_D09G013210;Ghir_D10G012480
	GO:0050832	defense response to fungus	8/139 (5.76%)	329/29822 (1.1%)	0.000162328	0.00243492	Ghir_A04G008350;Ghir_A06G011000;Ghir_A08G008430;Ghir_A09G016000;Ghir_D04G012400;Ghir_D06G012120;Ghir_D08G008490;Ghir_D09G015430
	GO:0040008	regulation of growth	8/139 (5.76%)	355/29822 (1.19%)	0.000271388	0.00381639	Ghir_A06G011000;Ghir_A08G008430;Ghir_A11G021660;Ghir_A12G008420;Ghir_D06G012120;Ghir_D08G008490;Ghir_D11G022730;Ghir_D12G008190
	GO:0009651	response to salt stress	13/139 (9.35%)	895/29822 (3%)	0.000295211	0.00390721	Ghir_A03G012270;Ghir_A06G011000;Ghir_A08G008430;Ghir_A13G025050;Ghir_A13G025060;Ghir_A13G025070;Ghir_D02G013820;Ghir_D05G017420;Ghir_D06G012120;Ghir_D08G008490;Ghir_D13G009170;Ghir_D13G009180;Ghir_D13G009200
	GO:0009944	polarity specification of adaxial/abaxial axis	4/139 (2.88%)	82/29822 (0.27%)	0.000596464	0.00745579	Ghir_A11G021660;Ghir_A12G008420;Ghir_D11G022730;Ghir_D12G008190
	GO:0065001	specification of axis polarity	4/139 (2.88%)	86/29822 (0.29%)	0.000713845	0.00803076	Ghir_A11G021660;Ghir_A12G008420;Ghir_D11G022730;Ghir_D12G008190
	GO:0009943	adaxial/abaxial axis specification	4/139 (2.88%)	86/29822 (0.29%)	0.000713845	0.00803076	Ghir_A11G021660;Ghir_A12G008420;Ghir_D11G022730;Ghir_D12G008190
	GO:0006970	response to osmotic stress	13/139 (5.76%)	1000/29822 (3.35%)	0.000832437	0.00891897	Ghir_A03G012270;Ghir_A06G011000;Ghir_A08G008430;Ghir_A13G025050;Ghir_A13G025060;Ghir_A13G025070;Ghir_D02G013820;Ghir_D05G017420;Ghir_D06G012120;Ghir_D08G008490;Ghir_D13G009170;Ghir_D13G009180;Ghir_D13G009200
	GO:0009414	response to water deprivation	8/139 (5.76%)	455/29822 (1.53%)	0.00136569	0.013631	Ghir_A03G012270;Ghir_A13G025050;Ghir_A13G025060;Ghir_A13G025070;Ghir_D02G013820;Ghir_D13G009170;Ghir_D13G009180;Ghir_D13G009200
	GO:0009955	adaxial/abaxial pattern specification	4/139 (2.88%)	103/29822 (0.35%)	0.00139834	0.013631	Ghir_A11G021660;Ghir_A12G008420;Ghir_D11G022730;Ghir_D12G008190
	GO:0009855	determination of bilateral symmetry	4/139 (2.88%)	106/29822 (0.36%)	0.00155437	0.013631	Ghir_A11G021660;Ghir_A12G008420;Ghir_D11G022730;Ghir_D12G008190
	GO:0009798	axis specification	4/139 (2.88%)	106/29822 (0.36%)	0.00155437	0.013631	Ghir_A11G021660;Ghir_A12G008420;Ghir_D11G022730;Ghir_D12G008190
	GO:0009415	response to water	8/139 (5.76%)	468/29822 (1.57%)	0.00162992	0.013631	Ghir_A03G012270;Ghir_A13G025050;Ghir_A13G025060;Ghir_A13G025070;Ghir_D02G013820;Ghir_D13G009170;Ghir_D13G009180;Ghir_D13G009200
	GO:0009799	specification of symmetry	4/139 (2.88%)	108/29822 (0.36%)	0.00166487	0.013631	Ghir_A11G021660;Ghir_A12G008420;Ghir_D11G022730;Ghir_D12G008190
	GO:0009620	response to fungus	8/139 (5.76%)	471/29822 (1.58%)	0.0016963	0.013631	Ghir_A04G008350;Ghir_A06G011000;Ghir_A08G008430;Ghir_A09G016000;Ghir_D04G012400;Ghir_D06G012120;Ghir_D08G008490;Ghir_D09G015430
	GO:1990267	response to transition metal nanoparticle	4/139 (2.88%)	114/29822 (0.38%)	0.00202899	0.0157421	Ghir_A06G011000;Ghir_A08G008430;Ghir_D06G012120;Ghir_D08G008490
	GO:0042743	hydrogen peroxide metabolic process	5/139 (3.6%)	234/29822 (0.78%)	0.00489421	0.0367065	Ghir_A09G013730;Ghir_A10G015080;Ghir_D03G015870;Ghir_D09G013210;Ghir_D10G012480
	GO:0009409	response to cold	8/139 (5.76%)	572/29822 (1.92%)	0.00549649	0.0398938	Ghir_A03G012270;Ghir_A13G025050;Ghir_A13G025060;Ghir_A13G025070;Ghir_D02G013820;Ghir_D13G009170;Ghir_D13G009180;Ghir_D13G009200
	GO:0006598	polyamine catabolic process	2/139 (1.44%)	27/29822 (0.09%)	0.00701425	0.049319	Ghir_A05G038670;Ghir_D04G004410
Pathway	GeneRatio	BgRatio	Pathway ID	P value	Qvalue	Gene ID
Phenylpropanoid biosynthesis	166/166 (100%)	488/14505 (3.36%）	ko00940	1.03827e-258	3.1148e-258	Ghir_A01G013500;Ghir_A01G013780;Ghir_A01G016980;Ghir_A02G005650;Ghir_A02G006580;Ghir_A02G009350;Ghir_A02G013970;Ghir_A02G016820;Ghir_A02G018930;Ghir_A11G004880;Ghir_A11G006260;Ghir_A11G019080;Ghir_A11G021430;Ghir_A11G021660;Ghir_A11G024800;Ghir_A12G000750;Ghir_A12G000760;Ghir_A12G008420;Ghir_A12G016660;Ghir_A12G016850;Ghir_A12G022350;Ghir_A12G025870;Ghir_A12G027530;Ghir_A12G028960;Ghir_A13G000360…
Biosynthesis of secondary metabolites	166/166 (100%)	3476/14505 (23.96%)	ko01110	4.78654e-105	7.17981e-105	Ghir_A01G013500;Ghir_A01G013780;Ghir_A01G016980;Ghir_A02G005650;Ghir_A02G006580;Ghir_A02G009350;Ghir_A02G013970;Ghir_A02G016820;Ghir_A02G018930;Ghir_A11G004880;Ghir_A11G006260;Ghir_A11G019080;Ghir_A11G021430;Ghir_A11G021660;Ghir_A11G024800;Ghir_A12G000750;Ghir_A12G000760;Ghir_A12G008420;Ghir_A12G016660;Ghir_A12G016850;Ghir_A12G022350;Ghir_A12G025870;Ghir_A12G027530;Ghir_A12G028960;Ghir_A13G000360…
Metabolic pathways	166/166 (100%)	6175/14505 (42.57%)	ko01100	7.47302e-63	7.47302e-63	Ghir_A01G013500;Ghir_A01G013780;Ghir_A01G016980;Ghir_A02G005650;Ghir_A02G006580;Ghir_A02G009350;Ghir_A02G013970;Ghir_A02G016820;Ghir_A02G018930;Ghir_A11G004880;Ghir_A11G006260;Ghir_A11G019080;Ghir_A11G021430;Ghir_A11G021660;Ghir_A11G024800;Ghir_A12G000750;Ghir_A12G000760;Ghir_A12G008420;Ghir_A12G016660;Ghir_A12G016850;Ghir_A12G022350;Ghir_A12G025870;Ghir_A12G027530;Ghir_A12G028960;Ghir_A13G000360…
