# Supplementary material for: Genome-wide identification and functional analysis of class III peroxidases in Gossypium hirsutum
Source: PeerJ. 2022 Jul 1;10:e13635. doi: 10.7717/peerj.13635 (PMC9252181; doi:10.7717/peerj.13635)
Supplement: Supplemental Information 8 [file peerj-10-13635-s008.xlsx]

## Sheet: GhPRX107-JinA
Sample Name	Target Name	Cт
1	GhPRX107	32.91
1	GhPRX107	32.8
1	GhPRX107	32.19
2	GhPRX107	33.1353
2	GhPRX107	33.8151
2	GhPRX107	33.2614
3	GhPRX107	24.66
3	GhPRX107	24.05
3	GhPRX107	25.28
1	EF-1α	30.5
1	EF-1α	30.76
1	EF-1α	30.6
2	EF-1α	31.6479
2	EF-1α	31.5561
2	EF-1α	30.7741
3	EF-1α	29.54
3	EF-1α	29.3
3	EF-1α	29.18

## Sheet: GhPRX107-MB177
Sample Name	Target Name	Cт
1	GhPRX107	35.29
1	GhPRX107	35.74
1	GhPRX107	34.84
2	GhPRX107	37.5196
2	GhPRX107	36.608
2	GhPRX107	37.06
3	GhPRX107	30
3	GhPRX107	30.28
3	GhPRX107	29.77
1	EF-1α	31.54
1	EF-1α	31.12
1	EF-1α	31.55
2	EF-1α	31.54
2	EF-1α	31.1
2	EF-1α	31.55
3	EF-1α	29.48
3	EF-1α	29.87
3	EF-1α	29.52

## Sheet: GhPRX128-JinA
Sample Name	Target Name	Cт
1	GhPRX128	25.98
1	GhPRX128	26.02
1	GhPRX128	25.93
2	GhPRX128	24.82
2	GhPRX128	24.98
2	GhPRX128	24.67
3	GhPRX128	26.33
3	GhPRX128	26.08
3	GhPRX128	26.2
1	EF-1α	30.5
1	EF-1α	30.76
1	EF-1α	30.6
2	EF-1α	30.5
2	EF-1α	30.76
2	EF-1α	30.6
3	EF-1α	29.54
3	EF-1α	29.3
3	EF-1α	29.18

## Sheet: GhPRX128-MB177
Sample Name	Target Name	Cт
1	GhPRX128	25.64
1	GhPRX128	25.46
1	GhPRX128	25.83
2	GhPRX128	24.77
2	GhPRX128	24.06
2	GhPRX128	24.415
3	GhPRX128	25.16
3	GhPRX128	25.19
3	GhPRX128	25.14
1	EF-1α	31.54
1	EF-1α	31.1
1	EF-1α	31.55
2	EF-1α	31.54
2	EF-1α	31.1
2	EF-1α	31.55
3	EF-1α	29.48
3	EF-1α	29.87
3	EF-1α	29.52
